# Supplementary material for: Structures and Bioactivities of Psolusosides B1, B2, J, K, L, M, N, O, P, and Q from the Sea Cucumber Psolus fabricii. The First Finding of Tetrasulfated Marine Low Molecular Weight Metabolites
Source: PubMed Central journal article supplement (PMC6891663; doi:10.3390/md17110631), 2019-11-06
Supplement: marinedrugs-17-00631-s001.pdf [file marinedrugs-17-00631-s001.pdf]

## Supplementary Data Content Page

**Title:** Structures and bioactivities of psolusosides B<sub>1</sub>, B<sub>2</sub>, J, K, L, M, N, O, P and Q, triterpene glycosides from the sea cucumber *Psolus fabricii*. Novel tri- and unique tetrasulfated carbohydrate chains and the non-holostane aglycone with 7,8-epoxide

**Authors:** Alexandra S. Silchenko, Anatoly I. Kalinovsky, Sergey A. Avilov, Vladimir I. Kalinin\*, Pelageya V. Andrijaschenko, Pavel S. Dmitrenok, Roman S. Popov, Ekaterina A. Chingizova

**Address:** <sup>1</sup>G.B. Elyakov Pacific Institute of Bioorganic Chemistry, Far Eastern Branch of Russian Academy of Sciences, Pr. 100-let Vladivostoku 159, 690022 Vladivostok, Russia

**Correspondence:** kalininv@piboc.dvo.ru; Tel.: +7-423-231-1168

### Contents:

**Table 1S.** NMR data for the carbohydrate moiety of psolusosides B<sub>1</sub> (1) and B<sub>2</sub> (2).

**Table 2S.** NMR data for the aglycone moiety of psolusoside J (3).

**Table 3S.** NMR data for the aglycone moiety of psolusoside K (4), L (5), M (6), N (7), O (8), P (9), Q (10).

**Figure 1.** The <sup>13</sup>C NMR (176.04 MHz) spectrum of the aglycone moiety of 1 in C<sub>5</sub>D<sub>5</sub>N/D<sub>2</sub>O (4/1)

**Figure 2.** The <sup>1</sup>H NMR (700.13 MHz) spectrum of the aglycone moiety of 1 in C<sub>5</sub>D<sub>5</sub>N/D<sub>2</sub>O (4/1)

**Figure 3.** The HSQC (700.13 MHz) spectrum of the aglycone moiety of 1 in C<sub>5</sub>D<sub>5</sub>N/D<sub>2</sub>O (4/1)

**Figure 4.** The ROESY (700.13 MHz) spectrum of the aglycone moiety of 1 in C<sub>5</sub>D<sub>5</sub>N/D<sub>2</sub>O (4/1)

**Figure 5.** The <sup>13</sup>C NMR (176.04 MHz) spectrum of the aglycone moiety of 2 in C<sub>5</sub>D<sub>5</sub>N/D<sub>2</sub>O (4/1)

**Figure 6.** The <sup>1</sup>H NMR (700.13 MHz) spectrum of the aglycone moiety of 2 in C<sub>5</sub>D<sub>5</sub>N/D<sub>2</sub>O (4/1)

**Figure 7.** The HSQC (700.13 MHz) spectrum of the aglycone moiety of 2 in C<sub>5</sub>D<sub>5</sub>N/D<sub>2</sub>O (4/1)

**Figure 8.** The ROESY (700.13 MHz) spectrum of the aglycone moiety of 2 in C<sub>5</sub>D<sub>5</sub>N/D<sub>2</sub>O (4/1)

**Figure 9.** The <sup>13</sup>C NMR (176.04 MHz) spectrum of the carbohydrate moiety of 3 in C<sub>5</sub>D<sub>5</sub>N/D<sub>2</sub>O (4/1)

**Figure 10.** The <sup>1</sup>H NMR (700.13 MHz) spectrum of the carbohydrate moiety of 3 in C<sub>5</sub>D<sub>5</sub>N/D<sub>2</sub>O (4/1)

**Figure 11.** The COSY (700.13 MHz) spectrum of the carbohydrate moiety of 3 in C<sub>5</sub>D<sub>5</sub>N/D<sub>2</sub>O (4/1)

**Figure 12.** The HSQC (700.13 MHz) spectrum of the carbohydrate moiety of 3 in C<sub>5</sub>D<sub>5</sub>N/D<sub>2</sub>O (4/1)

**Figure 13.** The ROESY (500.13 MHz) spectrum of the carbohydrate moiety of 3 in C<sub>5</sub>D<sub>5</sub>N/D<sub>2</sub>O (4/1)

**Figure 14.** 1D TOCSY (700.13 MHz) spectra of the monosaccharide residues in 3 in C<sub>5</sub>D<sub>5</sub>N/D<sub>2</sub>O (4/1)

**Figure 15.** The <sup>13</sup>C NMR (176.04 MHz) spectrum of the carbohydrate moiety of 4 in C<sub>5</sub>D<sub>5</sub>N/D<sub>2</sub>O (4/1)

**Figure 16.** The <sup>1</sup>H NMR (700.13 MHz) spectrum of the carbohydrate moiety of 4 in C<sub>5</sub>D<sub>5</sub>N/D<sub>2</sub>O (4/1)

**Figure 17.** The COSY (700.13 MHz) spectrum of the carbohydrate moiety of 4 in C<sub>5</sub>D<sub>5</sub>N/D<sub>2</sub>O (4/1)

**Figure 18.** The HSQC (700.13 MHz) spectrum of the carbohydrate moiety of 4 in C<sub>5</sub>D<sub>5</sub>N/D<sub>2</sub>O (4/1)

**Figure 19.** The ROESY (500.13 MHz) spectrum of the carbohydrate moiety of 4 in C<sub>5</sub>D<sub>5</sub>N/D<sub>2</sub>O (4/1)

**Figure 20.** 1D TOCSY (700.13 MHz) spectra of the monosaccharide residues in 4 in C<sub>5</sub>D<sub>5</sub>N/D<sub>2</sub>O (4/1)

**Figure 21.** The <sup>13</sup>C NMR (176.04 MHz) spectrum of the carbohydrate moiety of 5 in C<sub>5</sub>D<sub>5</sub>N/D<sub>2</sub>O (4/1)

**Figure 22.** The <sup>1</sup>H NMR (700.13 MHz) spectrum of the carbohydrate moiety of 5 in C<sub>5</sub>D<sub>5</sub>N/D<sub>2</sub>O (4/1)

**Figure 23.** The COSY (700.13 MHz) spectrum of the carbohydrate moiety of **5** in C<sub>5</sub>D<sub>5</sub>N/D<sub>2</sub>O (4/1)

**Figure 24.** The HSQC (700.13 MHz) spectrum of the carbohydrate moiety of **5** in C<sub>5</sub>D<sub>5</sub>N/D<sub>2</sub>O (4/1)

**Figure 25.** The ROESY (500.13 MHz) spectrum of the carbohydrate moiety of **5** in C<sub>5</sub>D<sub>5</sub>N/D<sub>2</sub>O (4/1)

**Figure 26.** 1D TOCSY (700.13 MHz) spectra of the monosaccharide residues in **5** in C<sub>5</sub>D<sub>5</sub>N/D<sub>2</sub>O (4/1)

**Figure 27.** The <sup>13</sup>C NMR (176.04 MHz) spectrum of the carbohydrate moiety of **6** in C<sub>5</sub>D<sub>5</sub>N/D<sub>2</sub>O (4/1)

**Figure 28.** The <sup>1</sup>H NMR (700.13 MHz) spectrum of the carbohydrate moiety of **6** in C<sub>5</sub>D<sub>5</sub>N/D<sub>2</sub>O (4/1)

**Figure 29.** The COSY (700.13 MHz) spectrum of the carbohydrate moiety of **6** in C<sub>5</sub>D<sub>5</sub>N/D<sub>2</sub>O (4/1)

**Figure 30.** The HSQC (700.13 MHz) spectrum of the carbohydrate moiety of **6** in C<sub>5</sub>D<sub>5</sub>N/D<sub>2</sub>O (4/1)

**Figure 31.** The ROESY (500.13 MHz) spectrum of the carbohydrate moiety of **6** in C<sub>5</sub>D<sub>5</sub>N/D<sub>2</sub>O (4/1)

**Figure 32.** 1D TOCSY (700.13 MHz) spectra of the monosaccharide residues in **6** in C<sub>5</sub>D<sub>5</sub>N/D<sub>2</sub>O (4/1)

**Figure 33.** The <sup>13</sup>C NMR (176.04 MHz) spectrum of the carbohydrate moiety of **7** in C<sub>5</sub>D<sub>5</sub>N/D<sub>2</sub>O (4/1)

**Figure 34.** The <sup>1</sup>H NMR (700.13 MHz) spectrum of the carbohydrate moiety of **7** in C<sub>5</sub>D<sub>5</sub>N/D<sub>2</sub>O (4/1)

**Figure 35.** The COSY (700.13 MHz) spectrum of the carbohydrate moiety of **7** in C<sub>5</sub>D<sub>5</sub>N/D<sub>2</sub>O (4/1)

**Figure 36.** The HSQC (700.13 MHz) spectrum of the carbohydrate moiety of **7** in C<sub>5</sub>D<sub>5</sub>N/D<sub>2</sub>O (4/1)

**Figure 37.** The ROESY (500.13 MHz) spectrum of the carbohydrate moiety of **7** in C<sub>5</sub>D<sub>5</sub>N/D<sub>2</sub>O (4/1)

**Figure 38.** 1D TOCSY (700.13 MHz) spectra of the monosaccharide residues in **7** in C<sub>5</sub>D<sub>5</sub>N/D<sub>2</sub>O (4/1)

**Figure 39.** The <sup>13</sup>C NMR (176.04 MHz) spectrum of the carbohydrate moiety of **8** in C<sub>5</sub>D<sub>5</sub>N/D<sub>2</sub>O (4/1)

**Figure 40.** The <sup>1</sup>H NMR (700.13 MHz) spectrum of the carbohydrate moiety of **8** in C<sub>5</sub>D<sub>5</sub>N/D<sub>2</sub>O (4/1)

**Figure 41.** The COSY (700.13 MHz) spectrum of the carbohydrate moiety of **8** in C<sub>5</sub>D<sub>5</sub>N/D<sub>2</sub>O (4/1)

**Figure 42.** The HSQC (700.13 MHz) spectrum of the carbohydrate moiety of **8** in C<sub>5</sub>D<sub>5</sub>N/D<sub>2</sub>O (4/1)

**Figure 43.** The ROESY (500.13 MHz) spectrum of the carbohydrate moiety of **8** in C<sub>5</sub>D<sub>5</sub>N/D<sub>2</sub>O (4/1)

**Figure 44.** 1D TOCSY (700.13 MHz) spectra of the monosaccharide residues in **8** in C<sub>5</sub>D<sub>5</sub>N/D<sub>2</sub>O (4/1)

**Figure 45.** The <sup>13</sup>C NMR (176.04 MHz) spectrum of the carbohydrate moiety of **9** in C<sub>5</sub>D<sub>5</sub>N/D<sub>2</sub>O (4/1)

**Figure 46.** The <sup>1</sup>H NMR (700.13 MHz) spectrum of the carbohydrate moiety of **9** in C<sub>5</sub>D<sub>5</sub>N/D<sub>2</sub>O (4/1)

**Figure 47.** The COSY (700.13 MHz) spectrum of the carbohydrate moiety of **9** in C<sub>5</sub>D<sub>5</sub>N/D<sub>2</sub>O (4/1)

**Figure 48.** The HSQC (700.13 MHz) spectrum of the carbohydrate moiety of **9** in C<sub>5</sub>D<sub>5</sub>N/D<sub>2</sub>O (4/1)

**Figure 49.** The ROESY (500.13 MHz) spectrum of the carbohydrate moiety of **9** in C<sub>5</sub>D<sub>5</sub>N/D<sub>2</sub>O (4/1)

**Figure 50.** 1D TOCSY (700.13 MHz) spectra of the monosaccharide residues in **9** in C<sub>5</sub>D<sub>5</sub>N/D<sub>2</sub>O (4/1)

**Figure 51.** The <sup>13</sup>C NMR (176.04 MHz) spectrum of the carbohydrate moiety of **10** in C<sub>5</sub>D<sub>5</sub>N/D<sub>2</sub>O (4/1)

**Figure 52.** The <sup>1</sup>H NMR (700.13 MHz) spectrum of the carbohydrate moiety of **10** in C<sub>5</sub>D<sub>5</sub>N/D<sub>2</sub>O (4/1)

**Figure 53.** The COSY (700.13 MHz) spectrum of the carbohydrate moiety of **10** in C<sub>5</sub>D<sub>5</sub>N/D<sub>2</sub>O (4/1)

**Figure 54.** The HSQC (700.13 MHz) spectrum of the carbohydrate moiety of **10** in C<sub>5</sub>D<sub>5</sub>N/D<sub>2</sub>O (4/1)

- Figure 55.** The ROESY (500.13 MHz) spectrum of the carbohydrate moiety of **10** in C<sub>5</sub>D<sub>5</sub>N/D<sub>2</sub>O (4/1)
- Figure 56.** 1D TOCSY (700.13 MHz) spectra of the monosaccharide residues in **10** in C<sub>5</sub>D<sub>5</sub>N/D<sub>2</sub>O (4/1)
- Figure 57.** ESI-MS (-) and (+) spectra of psolusoside B<sub>1</sub> (**1**)
- Figure 58.** ESI-MS (-) spectra of psolusoside B<sub>2</sub> (**2**)
- Figure 59.** ESI-MS (-) spectra of psolusoside J (**3**)
- Figure 60.** ESI-MS (-) spectra of psolusoside K (**4**)
- Figure 61.** ESI-MS (-) spectra of psolusoside L (**5**)
- Figure 62.** ESI-MS (-) spectra of psolusoside M (**6**)
- Figure 63.** ESI-MS (-) spectra of psolusoside N (**7**)
- Figure 64.** ESI-MS (-) spectra of psolusoside O (**8**)
- Figure 65.** ESI-MS (-) spectra of psolusoside P (**9**)
- Figure 66.** ESI-MS (-) spectra of psolusoside Q (**10**)

**Table 1S.** <sup>13</sup>C and <sup>1</sup>H NMR chemical shifts and HMBC and ROESY correlations of carbohydrate moiety of psulososides B<sub>1</sub> (**1**) and B<sub>2</sub> (**2**). <sup>a</sup> Recorded at 176.04 MHz in C<sub>5</sub>D<sub>5</sub>N/D<sub>2</sub>O (4/1). <sup>b</sup> Bold = interglycosidic positions. <sup>c</sup> Italic = sulphate position. <sup>d</sup> Recorded at 700.13 MHz in C<sub>5</sub>D<sub>5</sub>N/D<sub>2</sub>O (4/1). Multiplicity by 1D TOCSY.

| Atom           | $\delta_c$ mult. <sup>a, b, c</sup> | $\delta_H$ mult. <sup>d</sup> (J in Hz) | HMBC                    | ROESY                 |
|----------------|-------------------------------------|-----------------------------------------|-------------------------|-----------------------|
| Xyl1 (1→C-3)   |                                     |                                         |                         |                       |
| 1              | 104.8 CH                            | 4.56 (d, 7.3)                           | C: 3; C: 5 Xyl1         | H-3; H-3, 5 Xyl1      |
| 2              | <b>81.0</b> CH                      | 4.01 (t, 8.0)                           | C: 1 Glc2; C: 1, 3 Xyl1 | H-1 Glc2              |
| 3              | 75.2 CH                             | 4.20 (t, 8.8)                           | C: 2, 4 Xyl1            | H-1 Xyl1              |
| 4              | <b>78.6</b> CH                      | 4.08 (dt, 5.6; 9.6)                     | C: 1 Clc4; C: 5 Xyl1    | H-1 Glc4              |
| 5              | 63.6 CH <sub>2</sub>                | 4.43 (dd, 5.2; 12.1)                    | C: 1, 3, 4 Xyl1         |                       |
|                |                                     | 3.73 (brt, 11.3)                        | C: 1 Xyl1               | H-1 Xyl1              |
| Glc2 (1→2Xyl1) |                                     |                                         |                         |                       |
| 1              | 104.1 CH                            | 5.11 (d, 7.8)                           | C: 2 Xyl1; C: 5 Glc2    | H-2 Xyl1; H-3, 5 Glc2 |
| 2              | 75.1 CH                             | 3.82 (t, 7.8)                           | C: 1, 3 Glc2            |                       |
| 3              | 75.2 CH                             | 3.96 (t, 8.7)                           | C: 2, 4 Glc2            | H-1 Glc2              |
| 4              | <b>82.2</b> CH                      | 3.87 (t, 8.7)                           | C: 1 Glc3; C: 5, 6 Glc2 | H-1 Glc3              |
| 5              | 75.9 CH                             | 3.70 (dt, 2.9; 9.7)                     |                         | H-1, 3 Glc2           |
| 6              | 61.4 CH <sub>2</sub>                | 4.30 (dd, 2.9; 12.3)                    |                         |                       |
|                |                                     | 4.25 (dd, 4.6; 12.2)                    | C: 4, 5 Glc2            |                       |
| Glc3 (1→4Glc2) |                                     |                                         |                         |                       |
| 1              | 104.5 CH                            | 4.81 (d, 7.9)                           | C: 4 Glc2               | H-4 Glc2; H-5 Glc3    |
| 2              | 74.1 CH                             | 3.79 (t, 9.2)                           | C: 1, 3, 4 Glc3         | H-4 Glc3              |
| 3              | <b>76.8</b> CH                      | 4.07 (t, 9.2)                           | C: 2, 4 Glc3            | H-1 Glc3              |
| 4              | 70.7 CH                             | 3.90 (t, 9.2)                           | C: 3, 5, 6 Glc3         |                       |
| 5              | 75.5 CH                             | 4.03 (dd, 4.6; 10.1)                    |                         | H-1 Glc3              |
| 6              | 67.5 CH <sub>2</sub>                | 5.01 (d, 10.1)                          | C: 4 Glc3               |                       |
|                |                                     | 4.64 (dd, 6.7; 11.1)                    | C: 5 Glc3               |                       |
| Glc4 (1→4Xyl1) |                                     |                                         |                         |                       |
| 1              | 100.9 CH                            | 4.92 (d, 7.8)                           | C: 4 Xyl1               | H-4 Xyl1; H-3, 5 Glc4 |
| 2              | 80.6 CH                             | 4.74 (t, 8.9)                           | C: 1, 3 Glc4            |                       |
| 3              | 76.8 CH                             | 4.28 (t, 8.9)                           | C: 2, 4 Glc4            | H-1, 5 Glc4           |
| 4              | 70.7 CH                             | 3.90 (t, 8.9)                           | C: 3, 5, 6 Glc4         |                       |
| 5              | 77.4 CH                             | 3.84 (dd, 4.6; 10.2)                    | C: 4 Glc4               | H-1 Glc4              |
| 6              | 61.8 CH <sub>2</sub>                | 4.32 (dd, 2.5; 12.1)                    | C: 4 Glc4               |                       |
|                |                                     | 4.01 (dd, 6.4; 12.1)                    | C: 4, 5 Glc4            |                       |



**Table 2S.**  $^{13}\text{C}$  and  $^1\text{H}$  NMR chemical shifts and HMBC and ROESY correlations of aglycone moiety of psolusoside J (3). <sup>a</sup> Recorded at 176.04 MHz in  $\text{C}_5\text{D}_5\text{N}/\text{D}_2\text{O}$  (4/1). <sup>b</sup> Recorded at 700.13 MHz in  $\text{C}_5\text{D}_5\text{N}/\text{D}_2\text{O}$  (4/1). <sup>c</sup> Recorded at 500.13 MHz in  $\text{C}_5\text{D}_5\text{N}/\text{D}_2\text{O}$  (4/1).

| Position | $\delta_{\text{C}}$ mult. <sup>a</sup> | $\delta_{\text{H}}$ mult. (J in Hz) <sup>b</sup> | HMBC                           | ROESY <sup>c</sup>          |
|----------|----------------------------------------|--------------------------------------------------|--------------------------------|-----------------------------|
| 1        | 35.4 CH <sub>2</sub>                   | 1.35 m                                           |                                | H-3, H-5, H-11, H-19        |
| 2        | 26.7 CH <sub>2</sub>                   | 2.06 m<br>1.89 m                                 |                                |                             |
| 3        | 89.2 CH                                | 3.24 dd (3.8; 11.8)                              | C: 30, 1 Xyl1                  |                             |
| 4        | 39.2 C                                 |                                                  |                                |                             |
| 5        | 48.1 CH                                | 0.92 dd (4.3; 11.6)                              |                                | H-1, H-3, H-31              |
| 6        | 23.1 CH <sub>2</sub>                   | 1.91 m                                           |                                | H-19, H-31                  |
| 7        | 121.7 CH                               | 5.63 m                                           |                                |                             |
| 8        | 143.9 C                                |                                                  |                                |                             |
| 9        | 46.9 CH                                | 3.54 brd (15.2)                                  |                                | H-19                        |
| 10       | 35.7 C                                 |                                                  |                                |                             |
| 11       | 22.2 CH <sub>2</sub>                   | 1.80 m<br>1.53 m                                 |                                | H-1<br>H-32                 |
| 12       | 29.4 CH <sub>2</sub>                   | 2.19 brdd (5.8; 8.8)                             | C: 13, 18                      | H-17, H-21, H-32            |
| 13       | 56.6 C                                 |                                                  |                                |                             |
| 14       | 45.6 C                                 |                                                  |                                |                             |
| 15       | 51.8 CH <sub>2</sub>                   | 2.65 d (15.9)<br>2.32 d (16.1)                   | C: 13, 16, 32<br>C: 14, 16, 32 | H-7, H-32<br>H-7            |
| 16       | 213.8 C                                |                                                  |                                |                             |
| 17       | 63.3 CH                                | 2.87 s                                           | C: 12, 13, 16, 18, 20, 21      | H-12, H-21, H-22, H-32      |
| 18       | 179.0 C                                |                                                  |                                |                             |
| 19       | 23.8 CH <sub>3</sub>                   | 1.10 s                                           | C: 1, 9, 10                    | H-1, H-2, H-6, H-9          |
| 20       | 83.6 C                                 |                                                  |                                |                             |
| 21       | 26.0 CH <sub>3</sub>                   | 1.45 s                                           | C: 17, 20, 22                  | H-12, H-17, H-22            |
| 22       | 38.1 CH <sub>2</sub>                   | 1.71 m<br>1.56 m                                 |                                | H-17, H-21                  |
| 23       | 22.0 CH <sub>2</sub>                   | 1.71 m<br>1.43 m                                 |                                |                             |
| 24       | 37.7 CH <sub>2</sub>                   | 1.90 m                                           | C: 25, 26                      | H-26                        |
| 25       | 145.4 C                                |                                                  |                                |                             |
| 26       | 110.3 CH <sub>2</sub>                  | 4.70 brs<br>4.69 brs                             | C: 24, 27<br>C: 24, 27         | H-27<br>H-27                |
| 27       | 22.0 CH <sub>3</sub>                   | 1.63 s                                           | C: 24, 25, 26                  |                             |
| 30       | 17.1 CH <sub>3</sub>                   | 1.07 s                                           | C: 3, 4, 5, 31                 | H-2, H-6, H-6 Glc2          |
| 31       | 28.5 CH <sub>3</sub>                   | 1.20 s                                           | C: 3, 4, 5, 30                 | H-3, H-5, H-6, H-1 Xyl1     |
| 32       | 31.7 CH <sub>3</sub>                   | 1.16 s                                           | C: 8, 13, 14, 15               | H-7, H-11, H-12, H-15, H-17 |

**Table 3S.**  $^{13}\text{C}$  and  $^1\text{H}$  NMR chemical shifts and HMBC and ROESY correlations of aglycone moiety of psolusosides K–Q (4–10). <sup>a</sup> Recorded at 176.04 MHz in  $\text{C}_5\text{D}_5\text{N}/\text{D}_2\text{O}$  (4/1). <sup>b</sup> Recorded at 700.13 MHz in  $\text{C}_5\text{D}_5\text{N}/\text{D}_2\text{O}$  (4/1). <sup>c</sup> Recorded at 500.13 MHz in  $\text{C}_5\text{D}_5\text{N}/\text{D}_2\text{O}$  (4/1).

| Position | $\delta_{\text{C}}$ mult. <sup>a</sup> | $\delta_{\text{H}}$ mult. (J in Hz) <sup>b</sup> | HMBC                      | ROESY <sup>c</sup>       |
|----------|----------------------------------------|--------------------------------------------------|---------------------------|--------------------------|
| 1        | 36.2 CH <sub>2</sub>                   | 1.89 m                                           |                           | H-11, H-19               |
|          |                                        | 1.52 m                                           |                           | H-3, H-5, H-11           |
| 2        | 27.0 CH <sub>2</sub>                   | 2.30 m                                           |                           |                          |
|          |                                        | 2.02 m                                           |                           | H-19, H-30               |
| 3        | 88.7 CH                                | 3.31 (dd, 4.8; 11.6)                             | C: 4, 30, 31, C-1 Xyl1    | H-1, H-5, H-31, H-1 Xyl1 |
| 4        | 39.6 C                                 |                                                  |                           |                          |
| 5        | 52.8 CH                                | 0.99 (brd, 12.0)                                 | C: 4, 10, 19, 30          | H-1, H-3, H-7, H-31      |
| 6        | 21.0 CH <sub>2</sub>                   | 1.75 m                                           |                           |                          |
|          |                                        | 1.57 m                                           |                           | H-19, H-30               |
| 7        | 28.4 CH <sub>2</sub>                   | 1.62 m                                           |                           | H-15                     |
|          |                                        | 1.27 m                                           |                           | H-5, H-32                |
| 8        | 38.6 CH                                | 3.29 m                                           | C: 9                      | H-15, H-19               |
| 9        | 151.2 C                                |                                                  |                           |                          |
| 10       | 39.8 C                                 |                                                  |                           |                          |
| 11       | 110.9 CH                               | 5.35 m                                           | C: 8, 13                  | H-1                      |
| 12       | 32.0 CH <sub>2</sub>                   | 2.48 m                                           | C: 14                     | H-21                     |
|          |                                        | 2.52 m                                           | C: 9, 11, 13, 14, 18      | H-17, H-32               |
| 13       | 55.6 C                                 |                                                  |                           |                          |
| 14       | 41.9 C                                 |                                                  |                           |                          |
| 15       | 51.8 CH <sub>2</sub>                   | 2.39 d (15.6)                                    | C: 13, 16, 17, 32         | H-7, H-32                |
|          |                                        | 2.23 d (15.6)                                    | C: 14, 16, 32             | H-8                      |
| 16       | 212.9 C                                |                                                  |                           |                          |
| 17       | 61.2 CH                                | 2.80 s                                           | C: 12, 13, 16, 18, 20, 21 | H-12, H-21, H-22, H-32   |
| 18       | 175.8 C                                |                                                  |                           |                          |
| 19       | 21.9 CH <sub>3</sub>                   | 1.43 s                                           | C: 1, 5, 9, 10            | H-1, H-2, H-8, H-30      |
| 20       | 82.9 C                                 |                                                  |                           |                          |
| 21       | 26.6 CH <sub>3</sub>                   | 1.40 s                                           | C: 17, 20, 22             | H-12, H-17, H-22         |
| 22       | 38.3 CH <sub>2</sub>                   | 1.81 m                                           |                           | H-12, H-17, H-21         |
|          |                                        | 1.66 m                                           |                           |                          |
| 23       | 22.1 CH <sub>2</sub>                   | 1.81 m                                           |                           |                          |
|          |                                        | 1.53 m                                           |                           |                          |
| 24       | 37.8 CH <sub>2</sub>                   | 1.99 m                                           | C: 25, 26, 27             | H-27                     |
| 25       | 145.4 C                                |                                                  |                           |                          |
| 26       | 110.3 CH <sub>2</sub>                  | 4.78 brs                                         | C: 24, 25, 27             | H-27                     |
| 27       | 22.2 CH <sub>3</sub>                   | 1.70 s                                           | C: 24, 25, 26             |                          |
| 30       | 16.5 CH <sub>3</sub>                   | 1.11 s                                           | C: 3, 4, 5, 31            | H-2, H-6, H-19           |
| 31       | 27.9 CH <sub>3</sub>                   | 1.31 s                                           | C: 3, 4, 5, 30            | H-3, H-5, H-6, H-1 Xyl1  |
| 32       | 20.5 CH <sub>3</sub>                   | 0.92 s                                           | C: 8, 13, 14, 15          | H-7, H-12, H-15, H-17    |

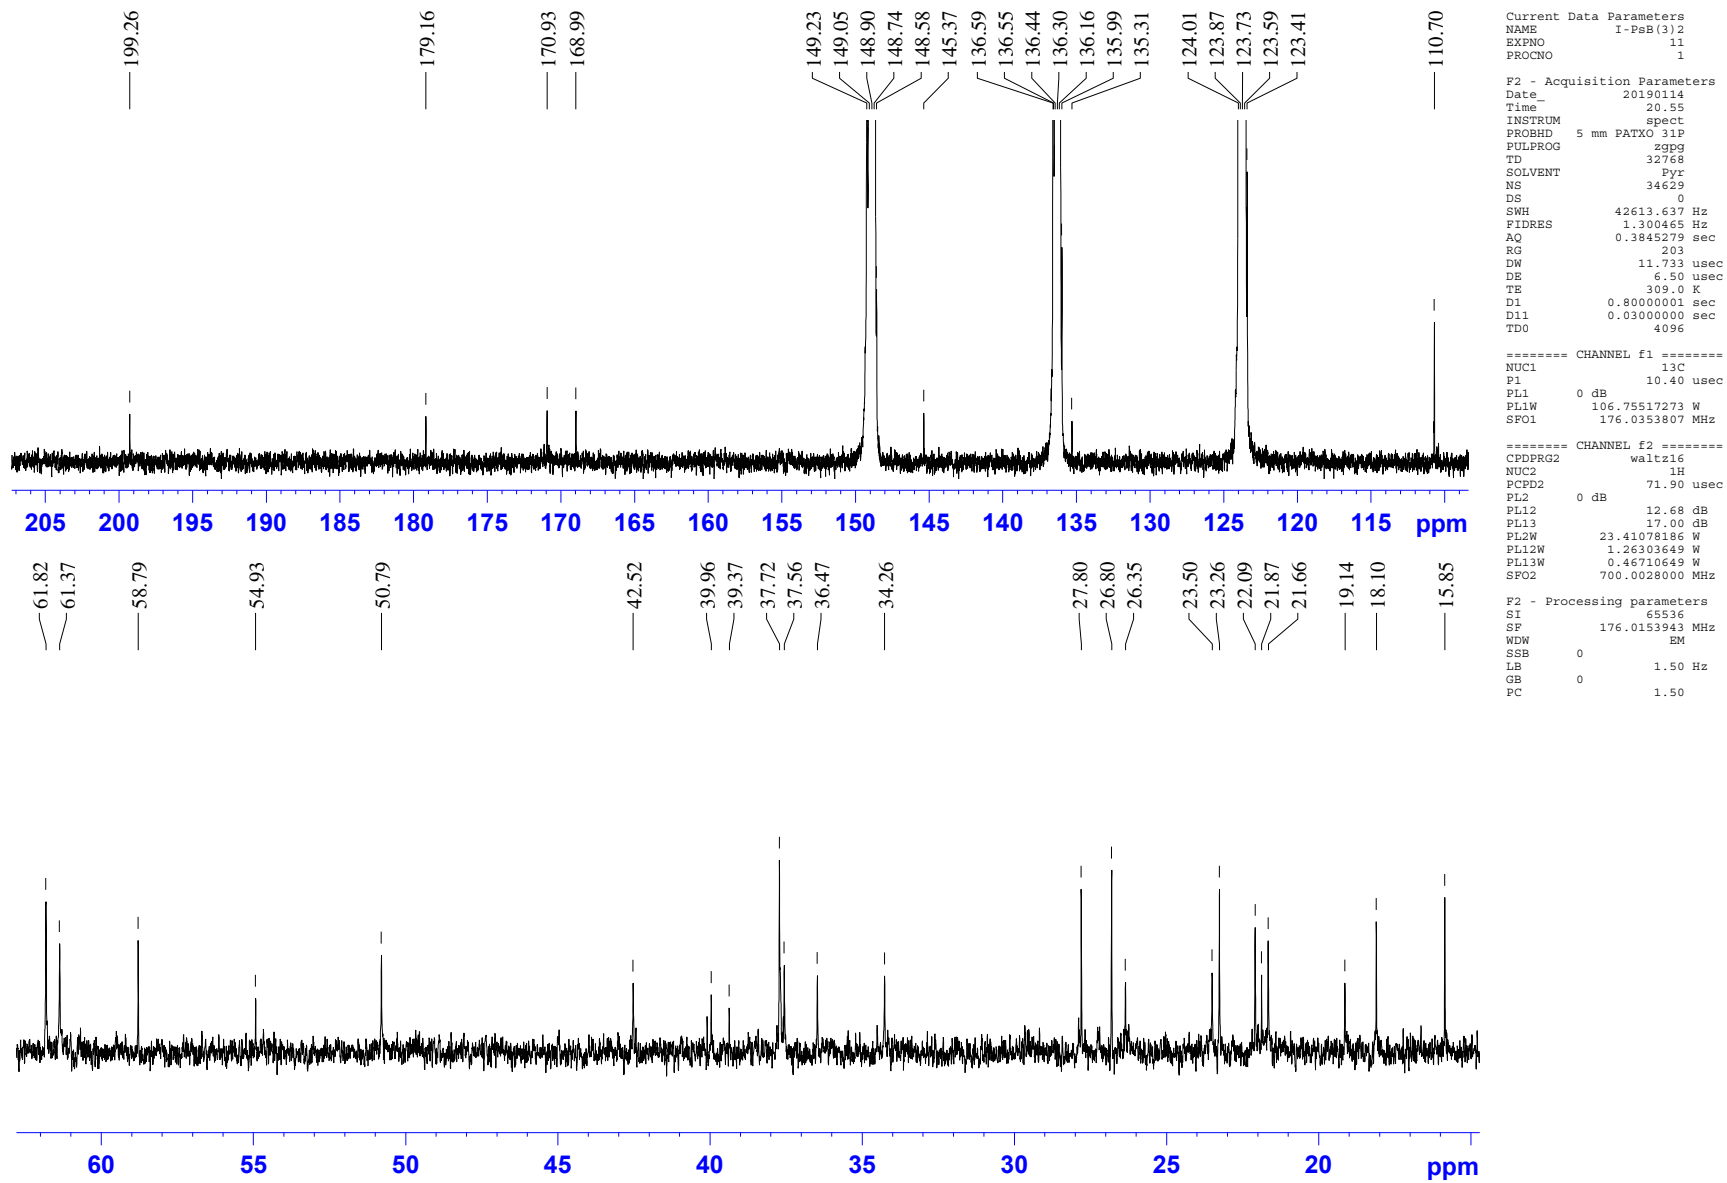

Figure 1. The  $^{13}\text{C}$  NMR (176.04 MHz) spectrum of the aglycone moiety of **1** in  $\text{C}_5\text{D}_5\text{N}/\text{D}_2\text{O}$  (4/1).

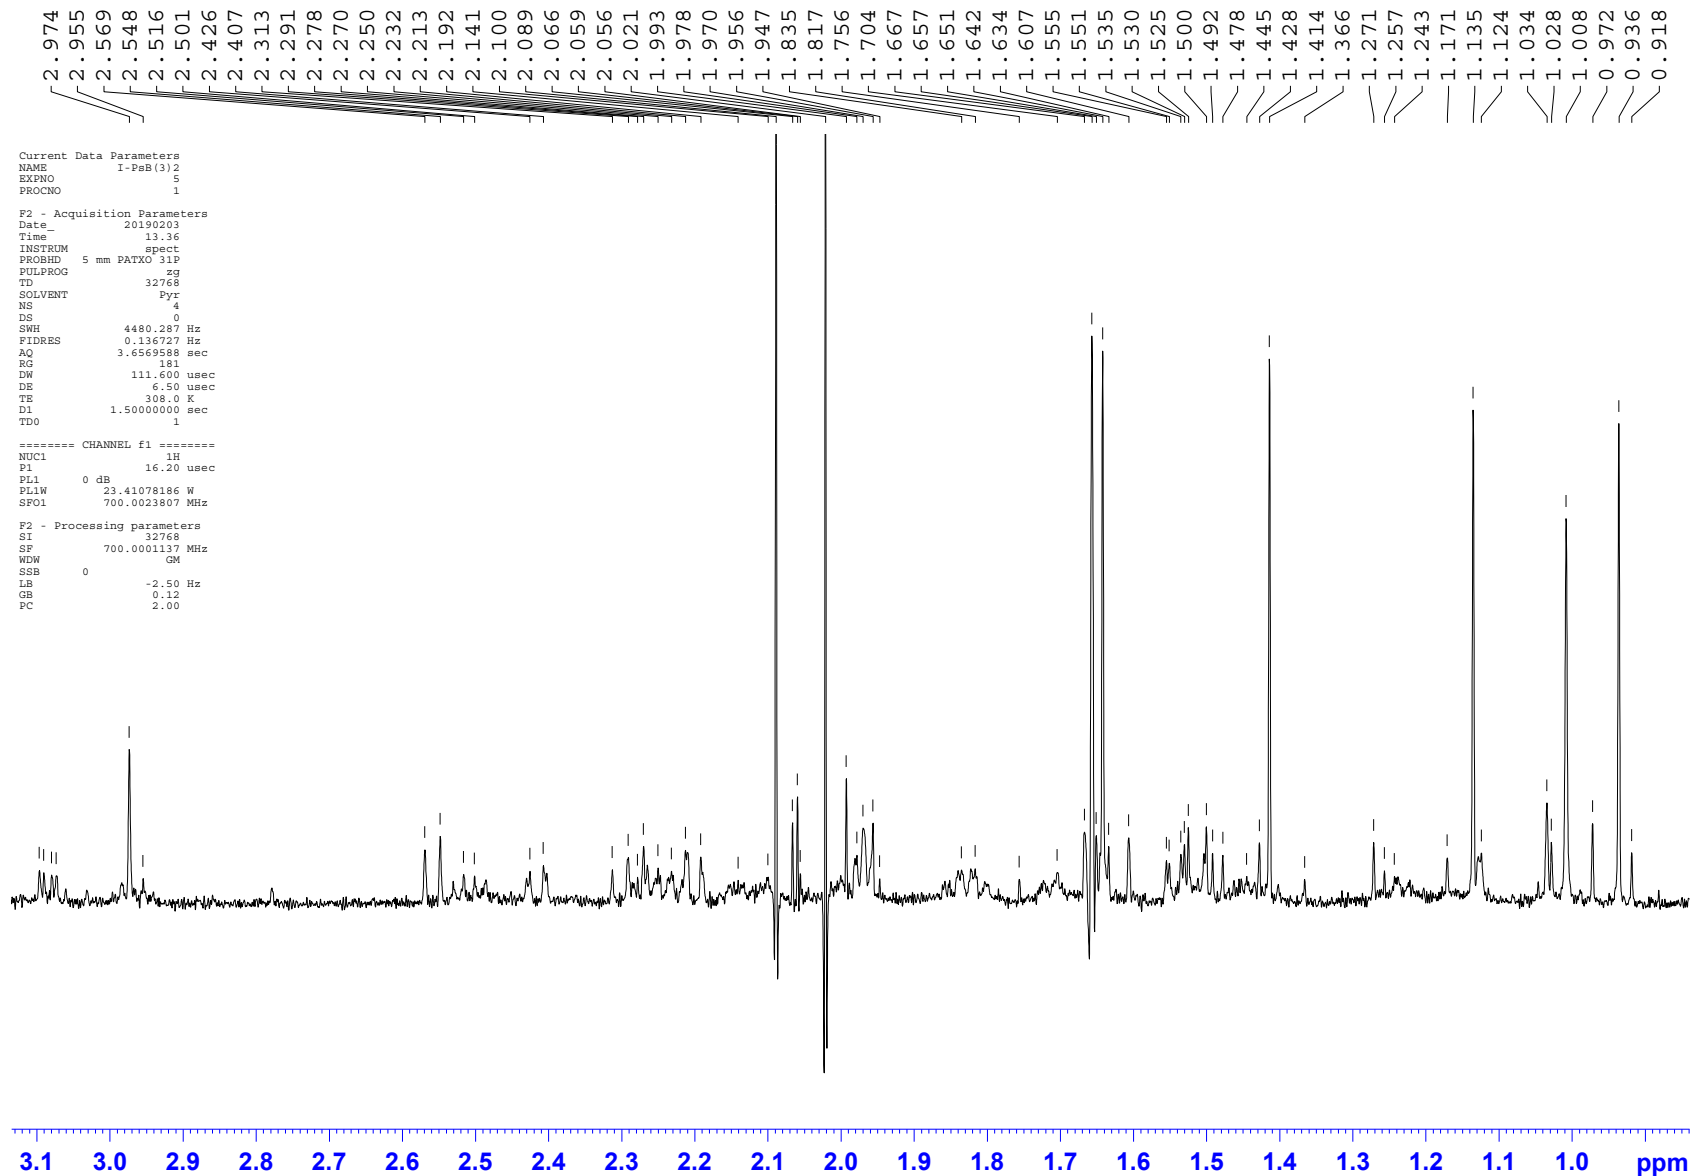

Figure 2. The  $^1\text{H}$  NMR (700.13 MHz) spectrum of the aglycone moiety of 1 in  $\text{C}_5\text{D}_5\text{N}/\text{D}_2\text{O}$  (4/1).

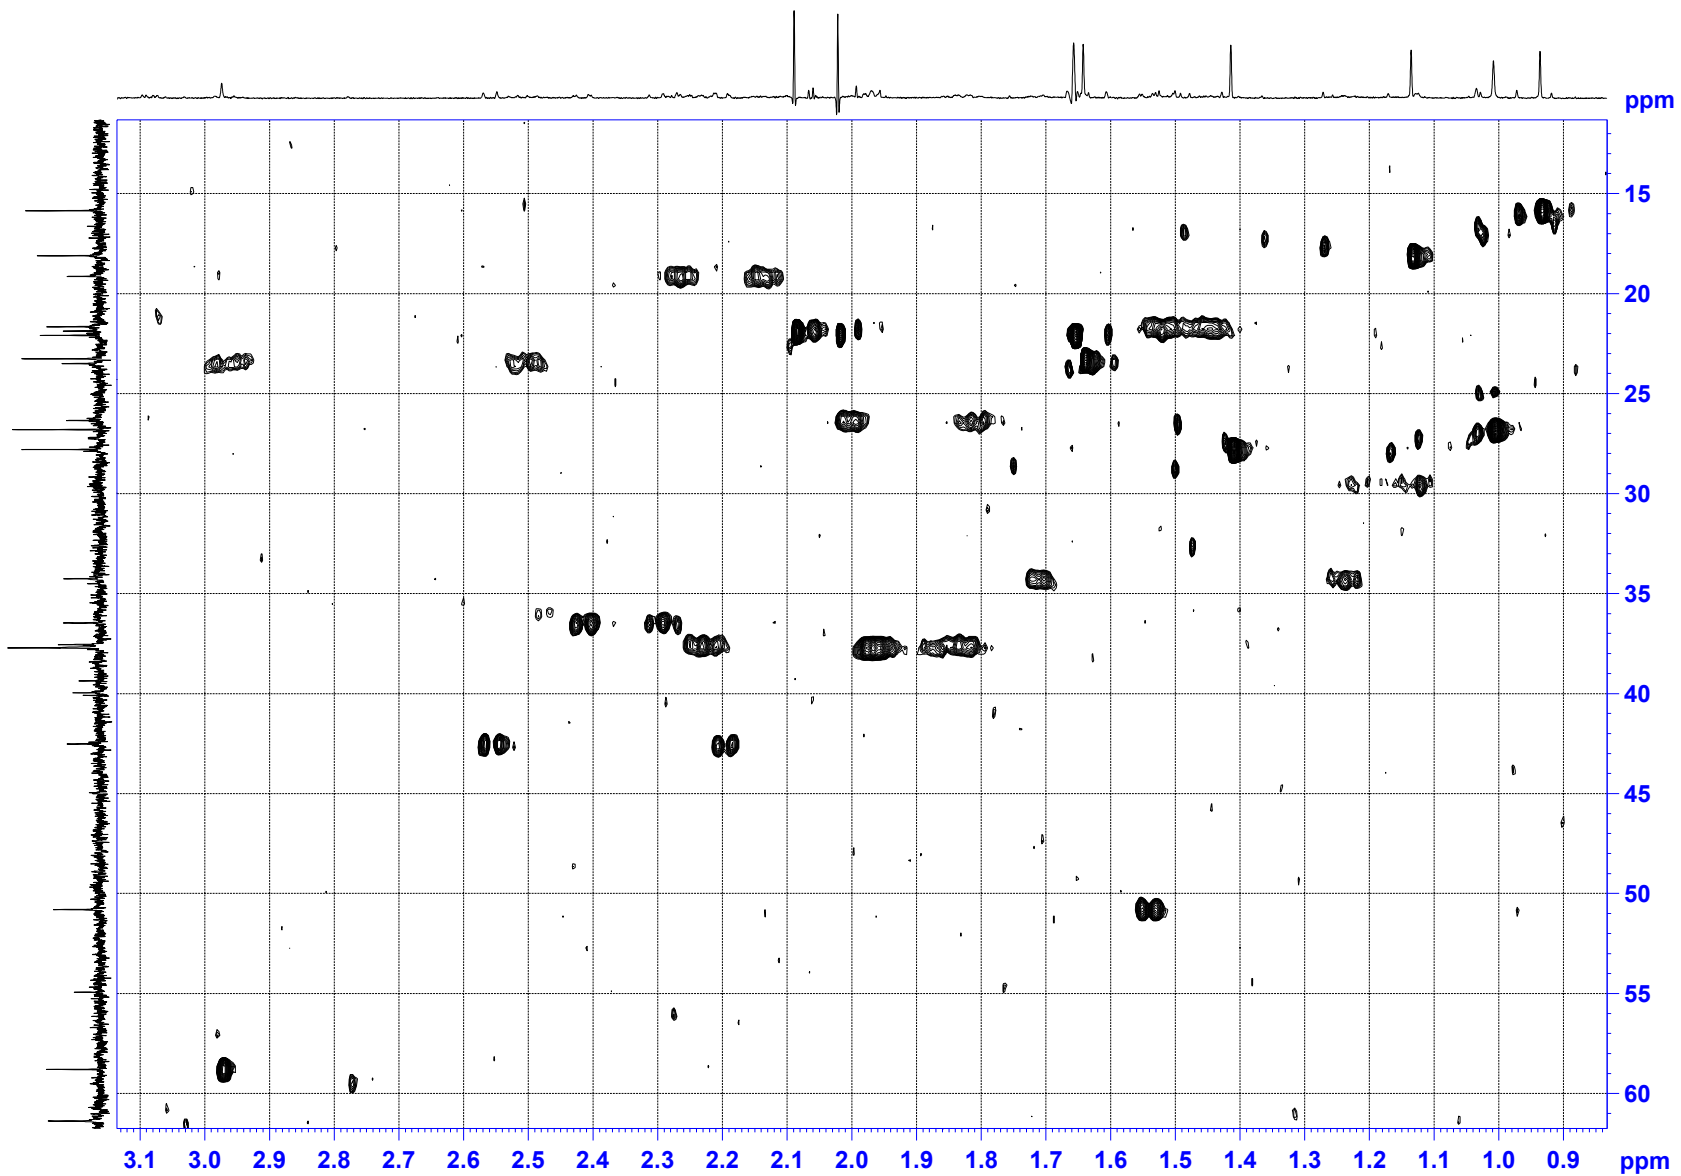

Figure 3. The HSQC (700.13 MHz) spectrum of the aglycone moiety of **1** in  $\text{C}_5\text{D}_5\text{N}/\text{D}_2\text{O}$  (4/1).

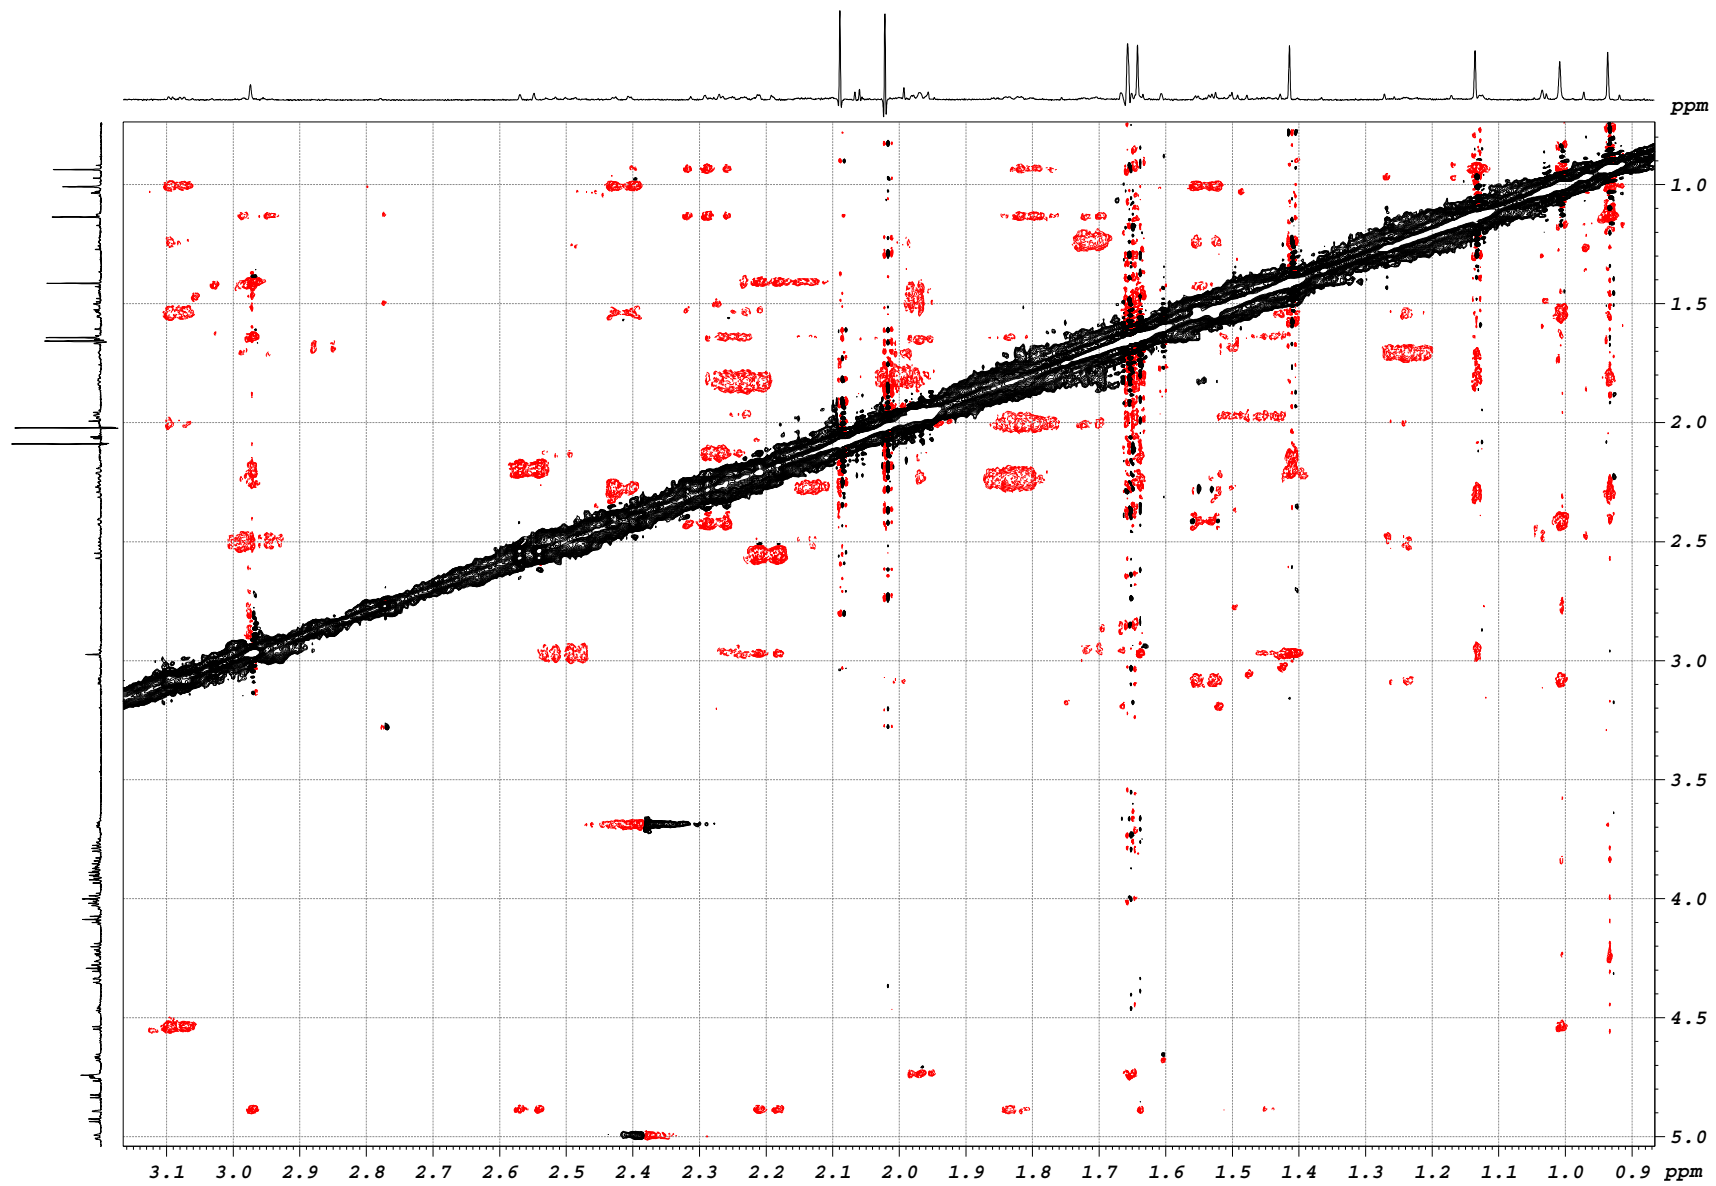

Figure 4. The ROESY (700.13 MHz) spectrum of the aglycone moiety of **1** in C<sub>5</sub>D<sub>5</sub>N/D<sub>2</sub>O (4/1).

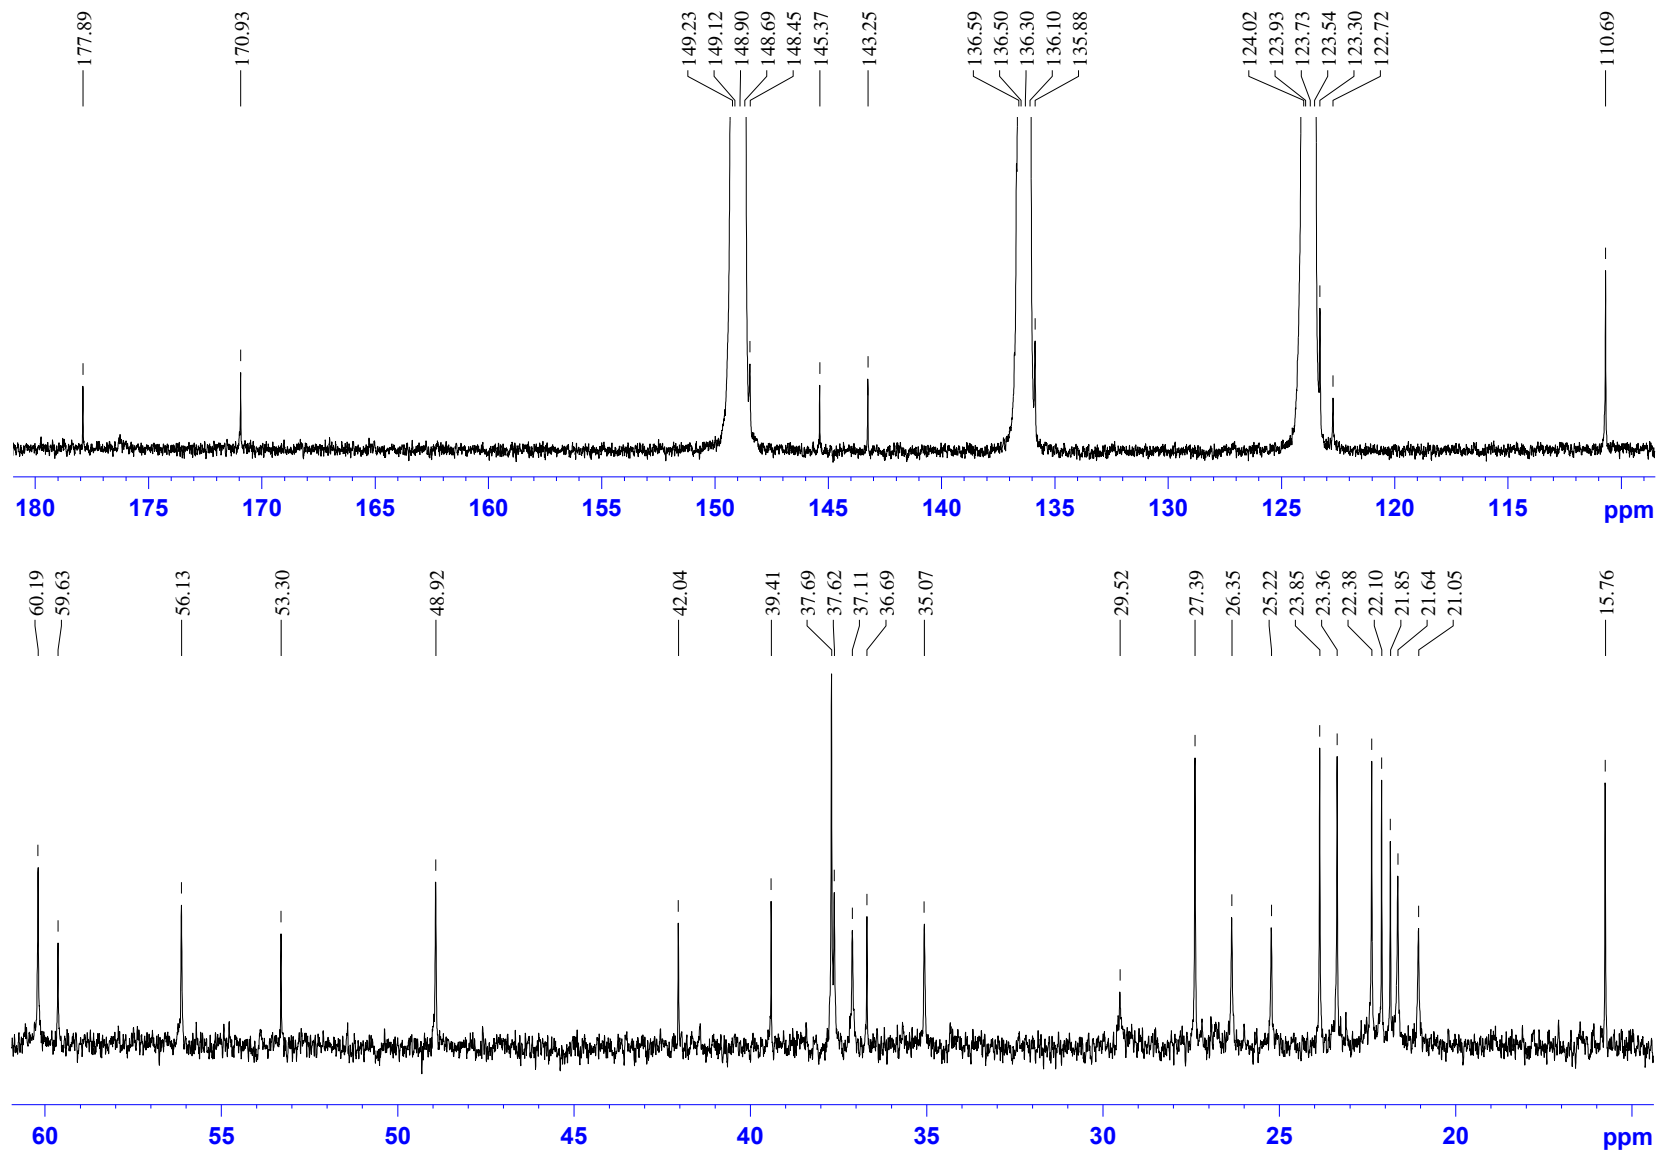

Figure 5. The <sup>13</sup>C NMR (176.04 MHz) spectrum of the aglycone moiety of **2** in C<sub>5</sub>D<sub>5</sub>N/D<sub>2</sub>O (4/1).

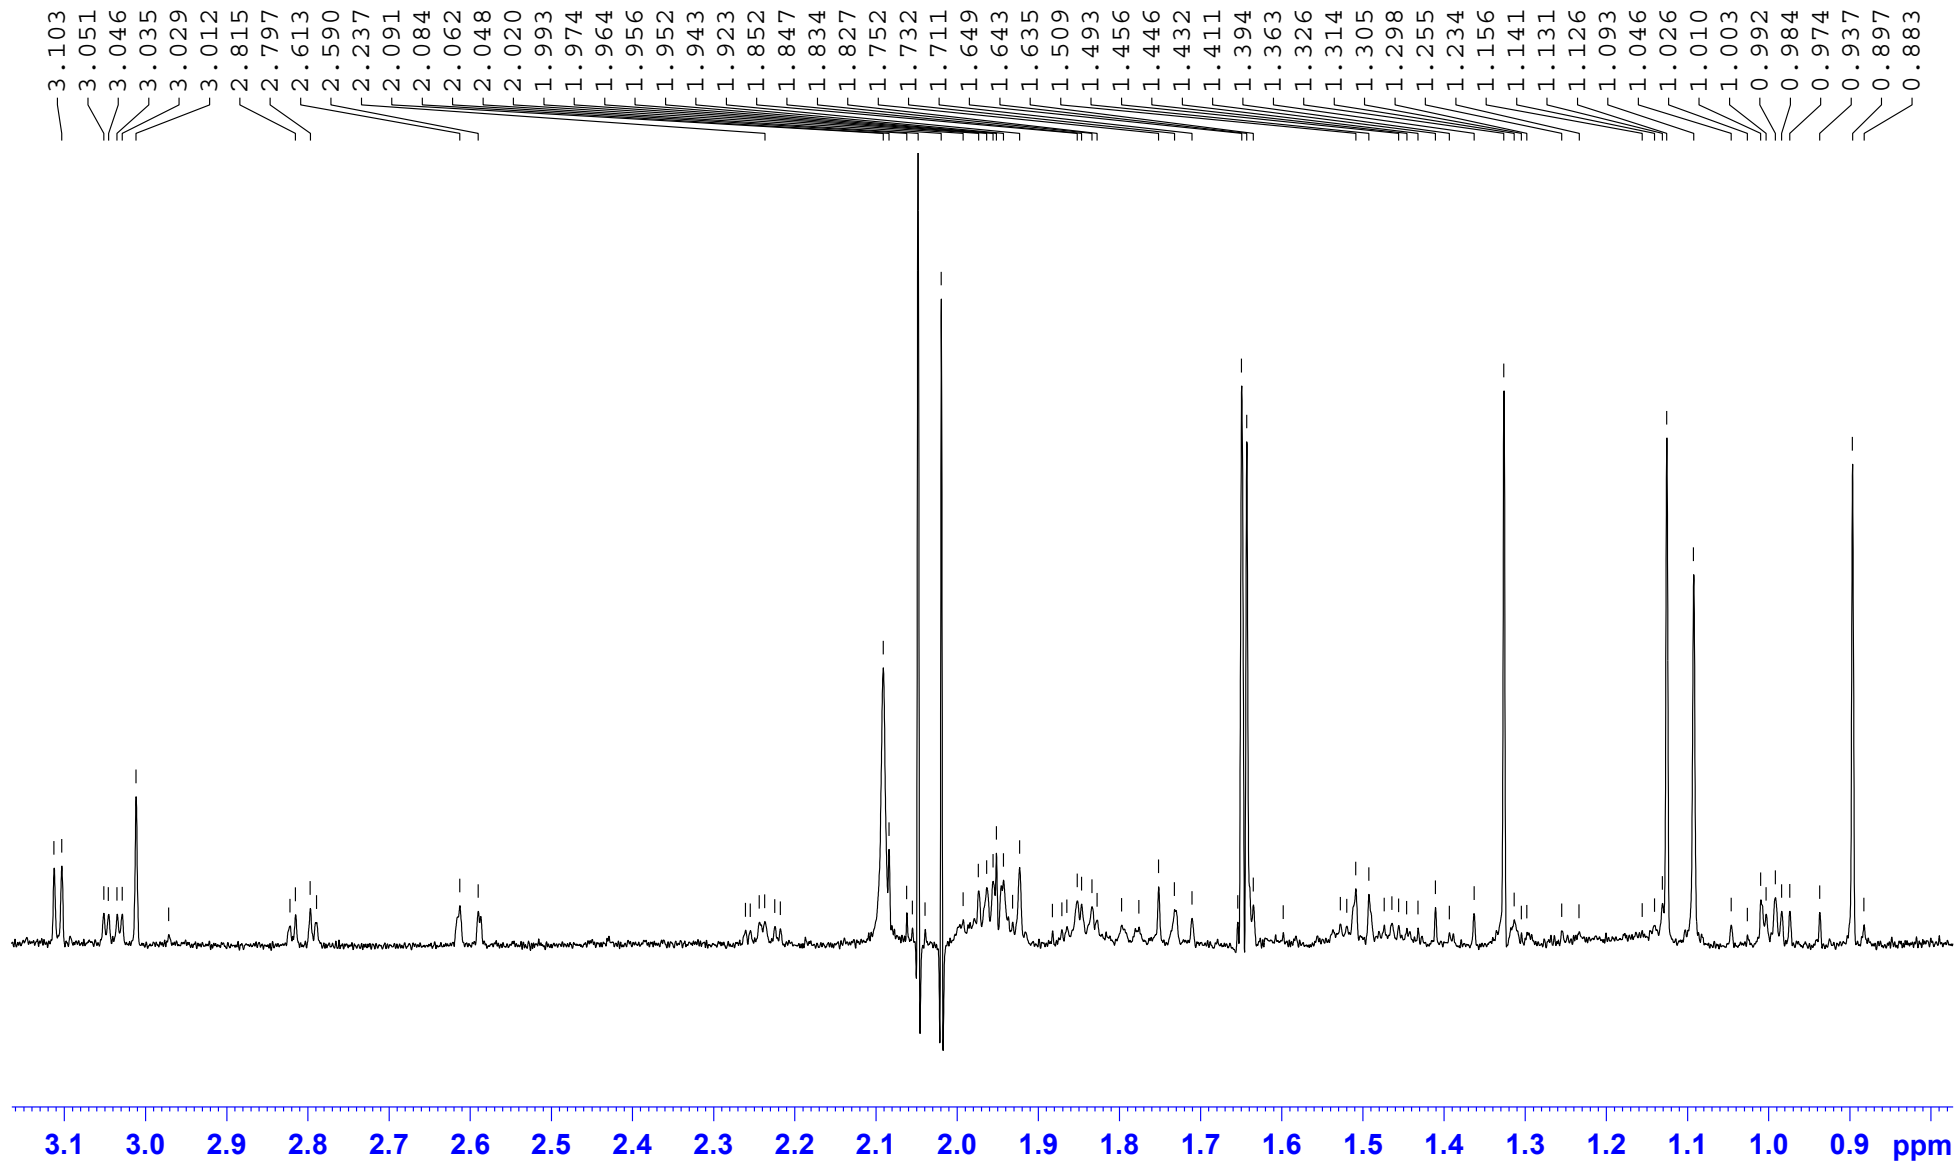

Figure 6. The  $^1\text{H}$  NMR (700.13 MHz) spectrum of the aglycone moiety of **2** in  $\text{C}_5\text{D}_5\text{N}/\text{D}_2\text{O}$  (4/1).



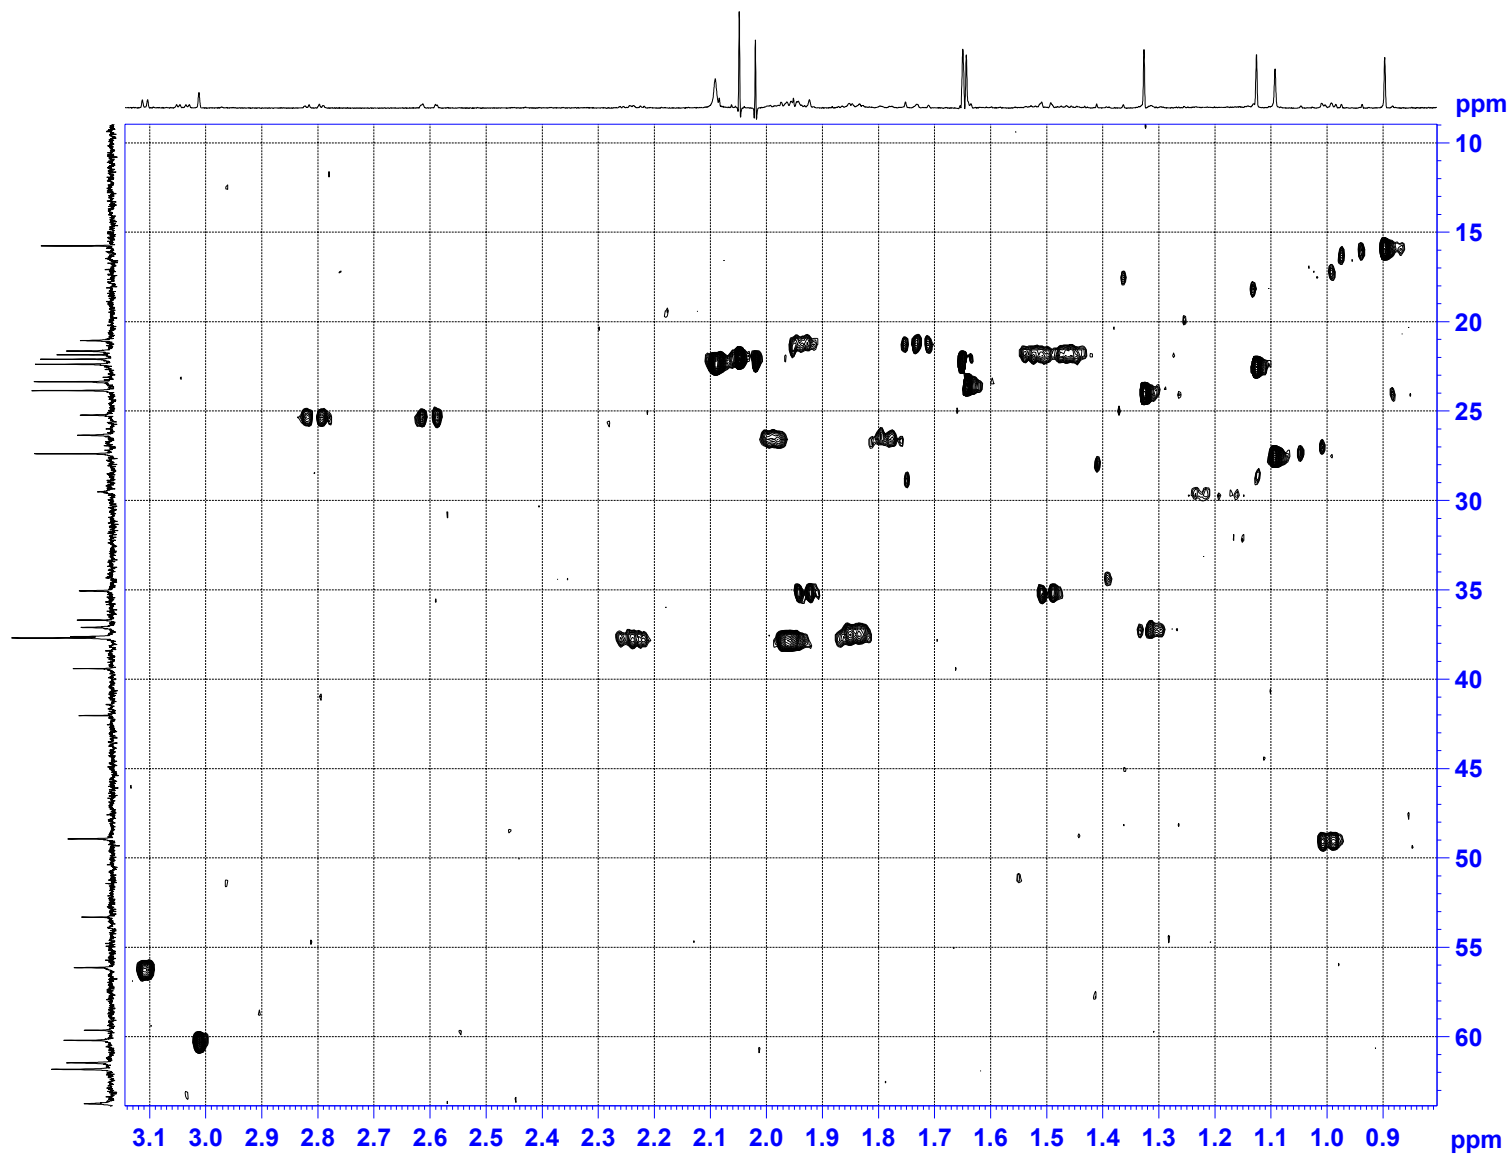

Figure 7. The HSQC (700.13 MHz) spectrum of the aglycone moiety of **2** in  $\text{C}_5\text{D}_5\text{N}/\text{D}_2\text{O}$  (4/1).

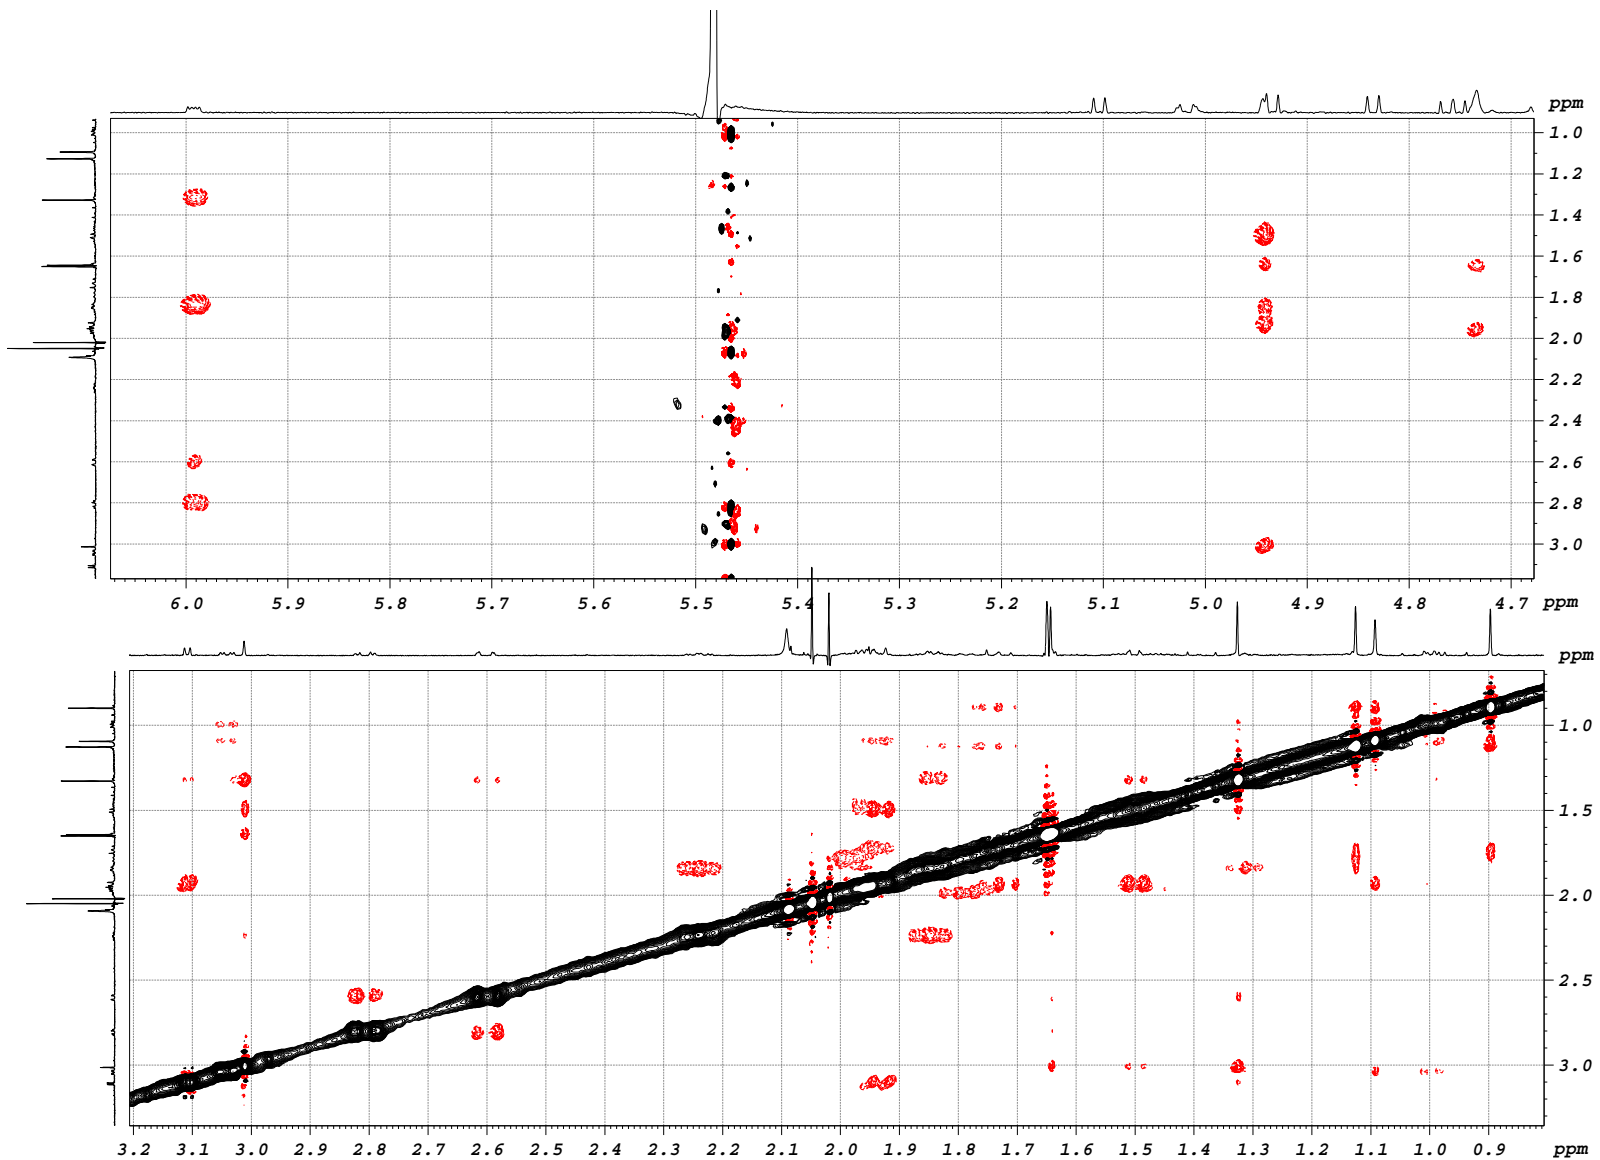

Figure 8. The ROESY (700.13 MHz) spectrum of the aglycone moiety of **2** in C<sub>5</sub>D<sub>5</sub>N/D<sub>2</sub>O (4/1).

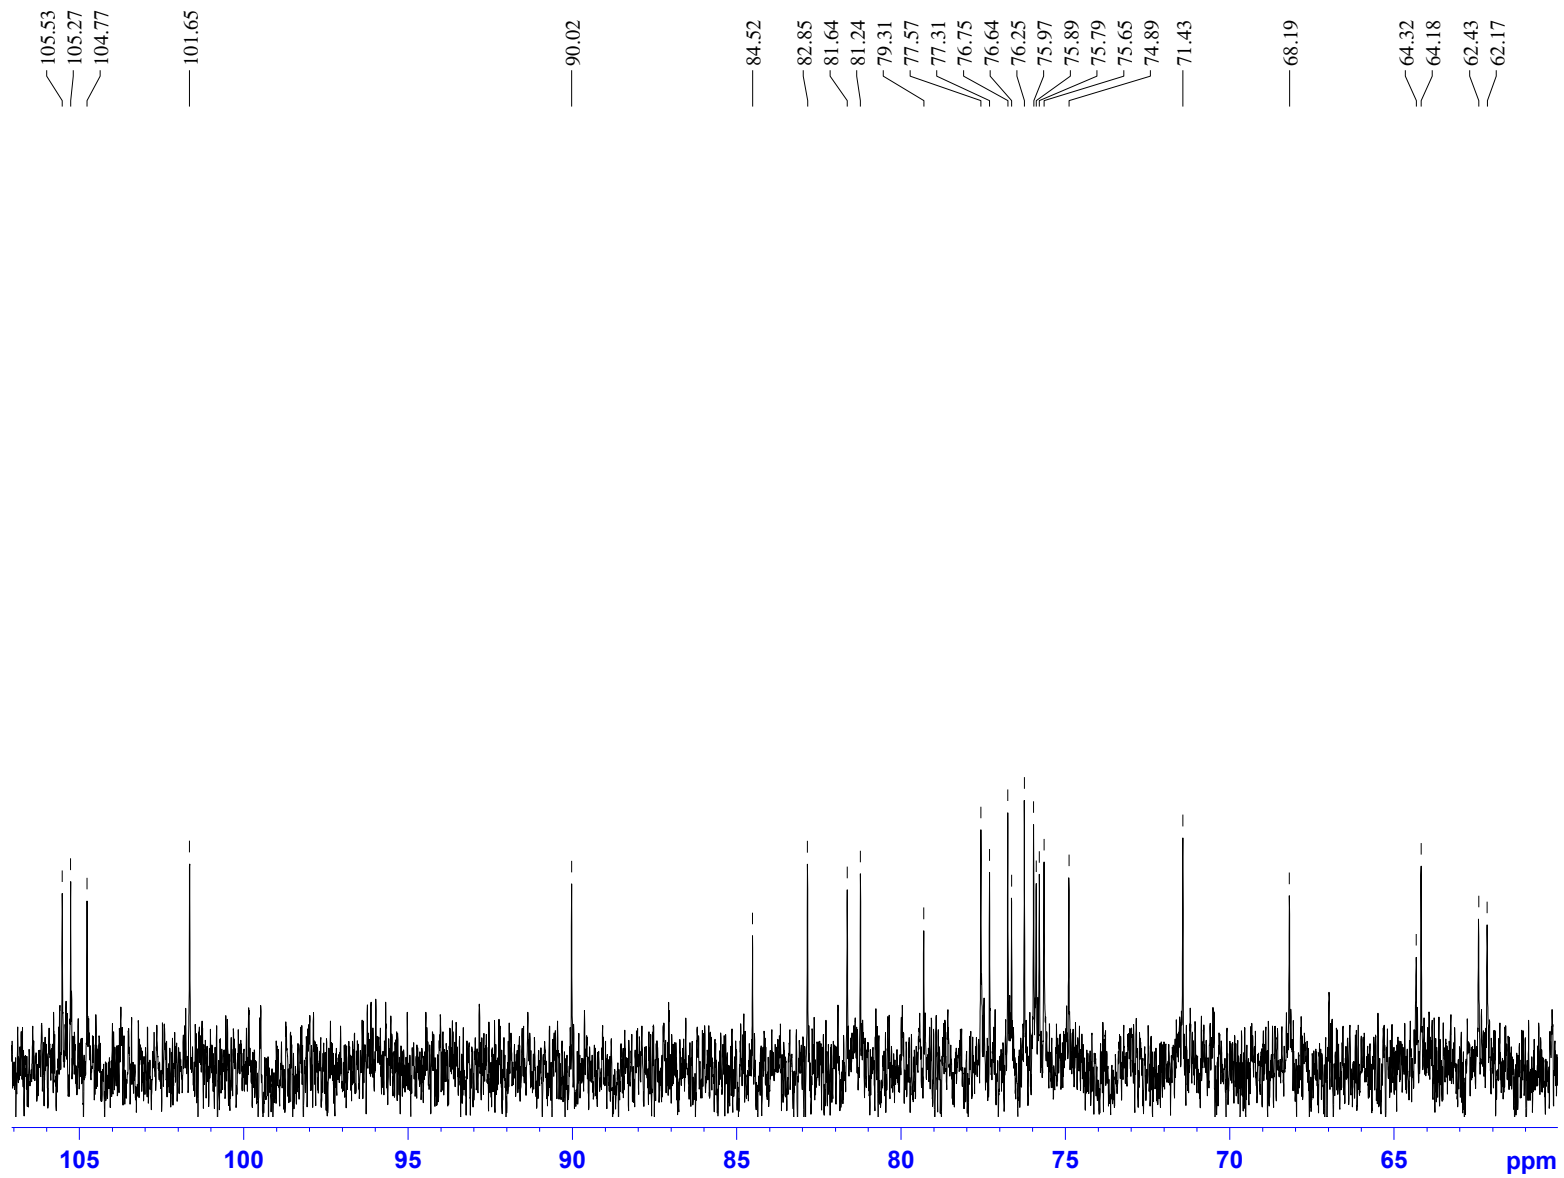

**Figure 9.** The  $^{13}\text{C}$  NMR (176.04 MHz) spectrum of the carbohydrate moiety of **3** in  $\text{C}_5\text{D}_5\text{N}/\text{D}_2\text{O}$  (4/1).

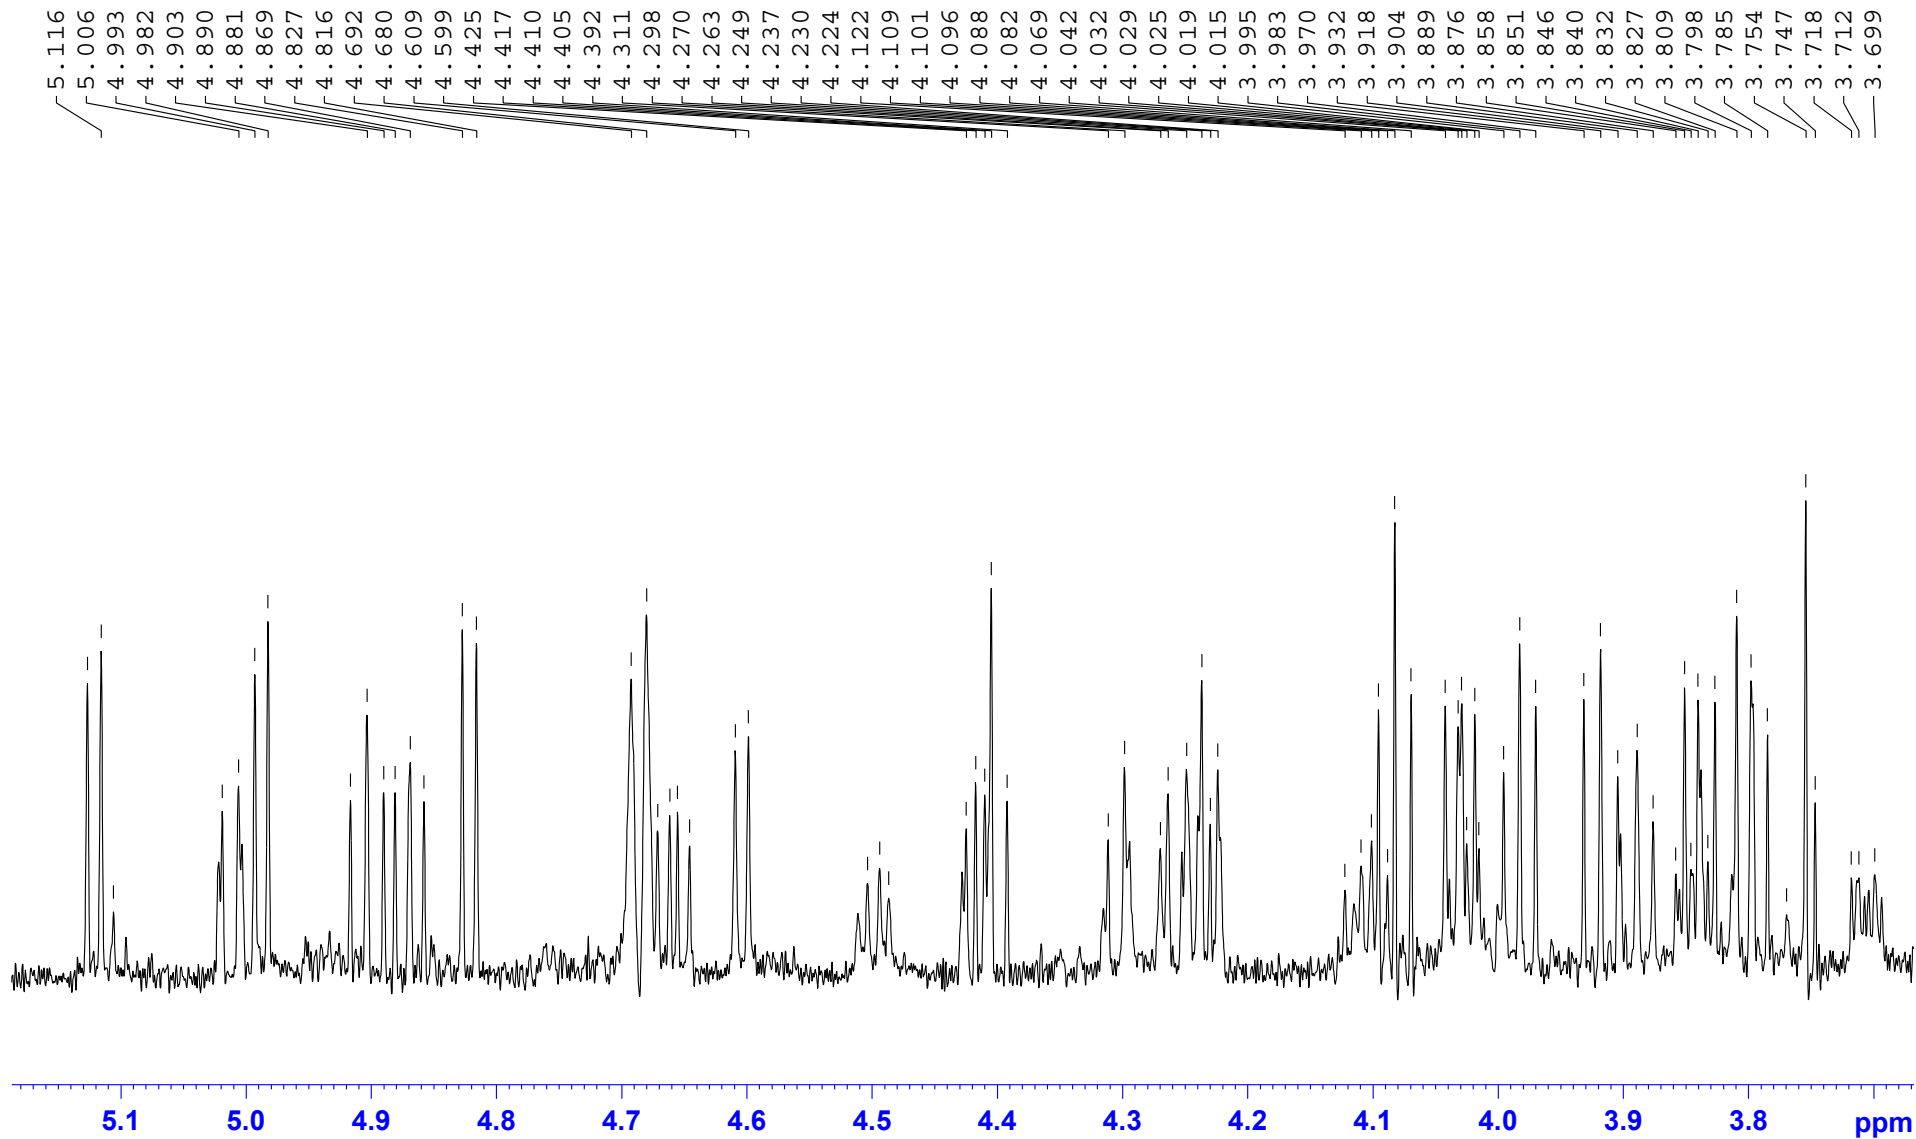

**Figure 10.** The  $^1\text{H}$  NMR (700.13 MHz) spectrum of the carbohydrate moiety of **3** in  $\text{C}_5\text{D}_5\text{N}/\text{D}_2\text{O}$  (4/1).

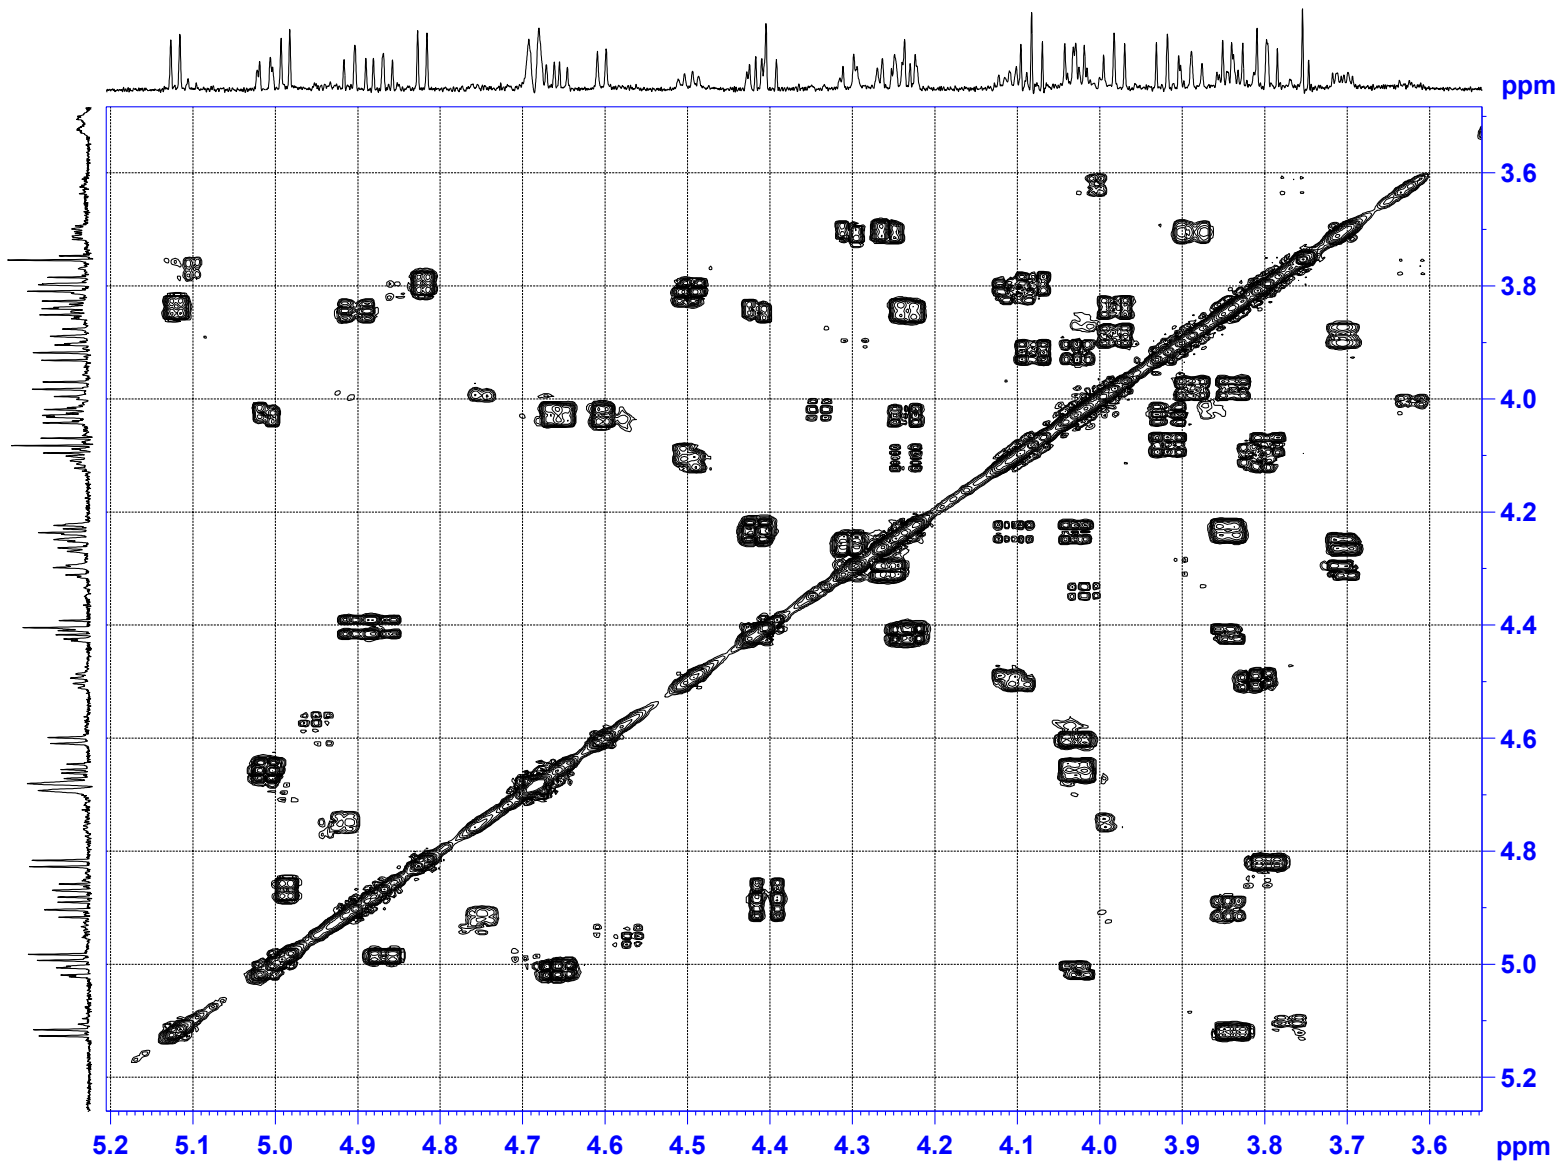

Figure 11. The COSY (700.13 MHz) spectrum of the carbohydrate moiety of **3** in C<sub>5</sub>D<sub>5</sub>N/D<sub>2</sub>O (4/1).

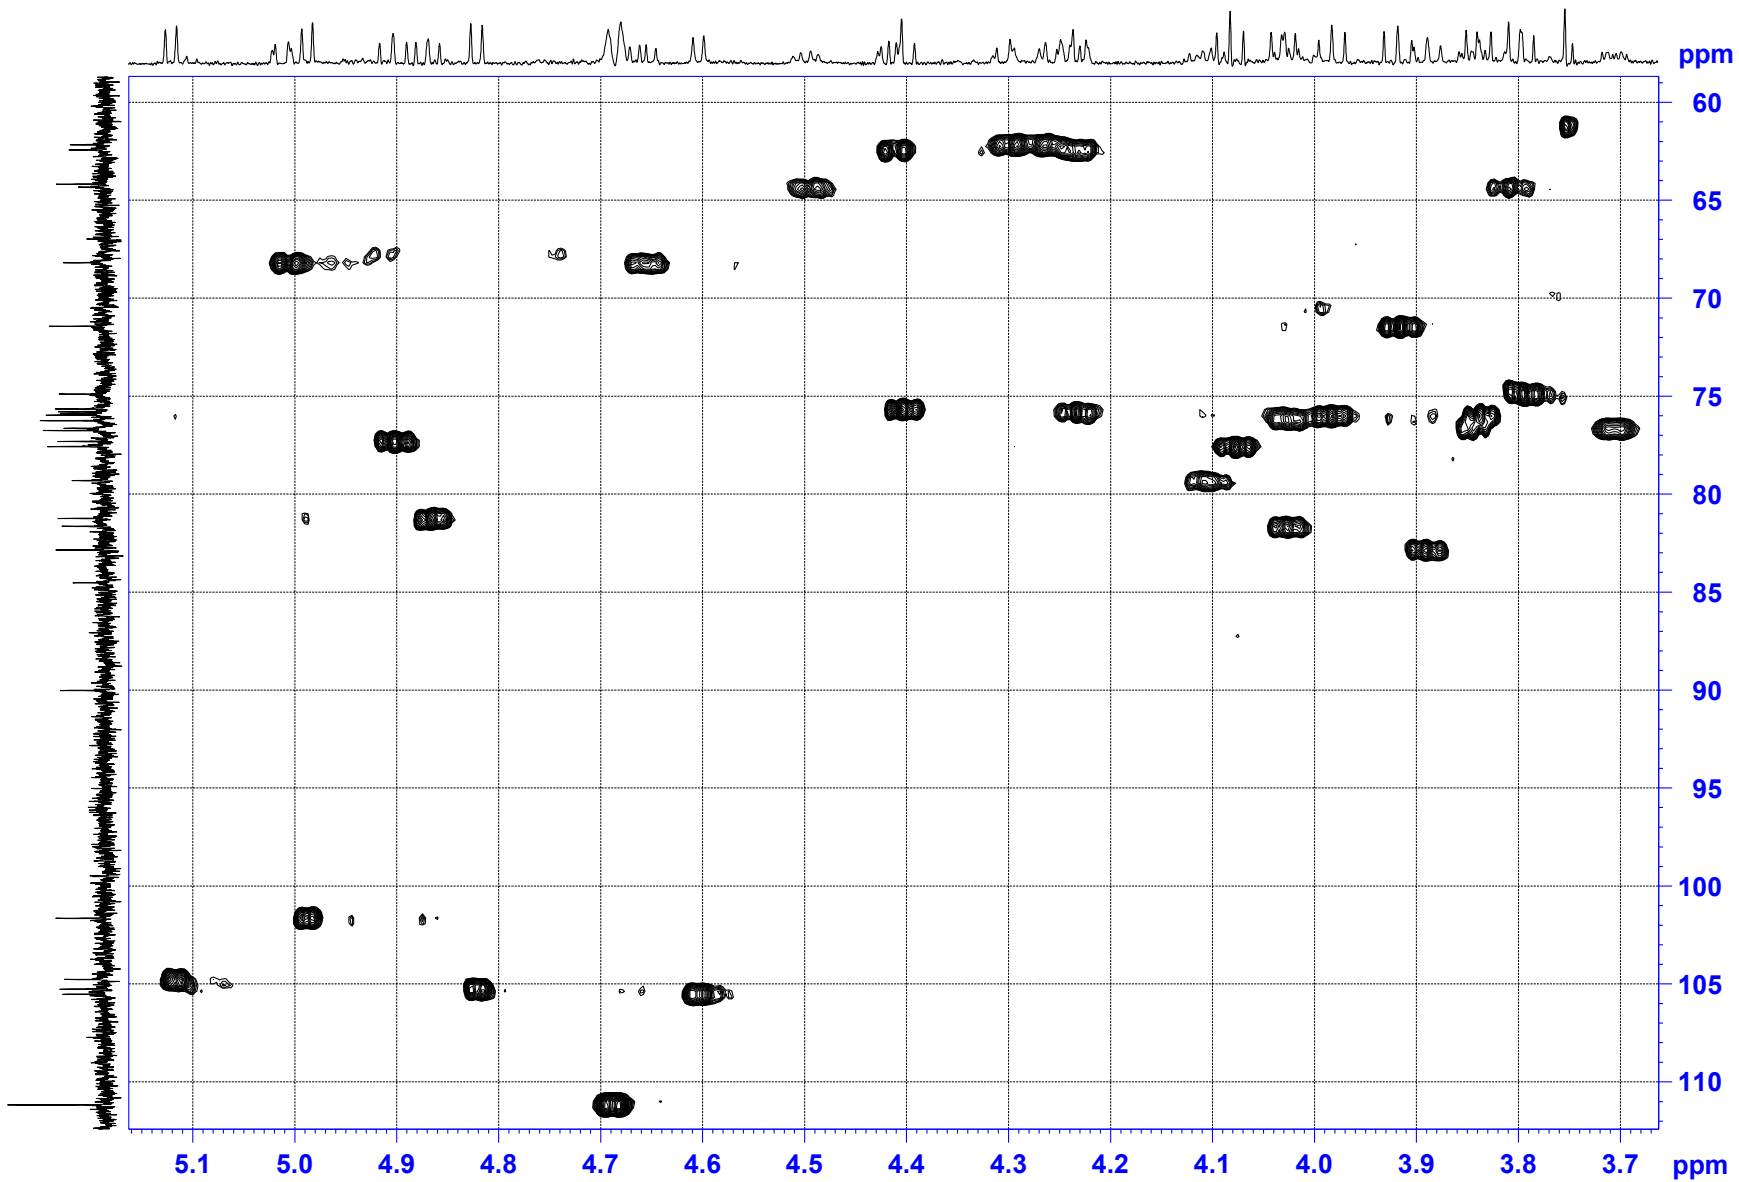

Figure 12. The HSQC (700.13 MHz) spectrum of the carbohydrate moiety of **3** in  $\text{C}_5\text{D}_5\text{N}/\text{D}_2\text{O}$  (4/1).

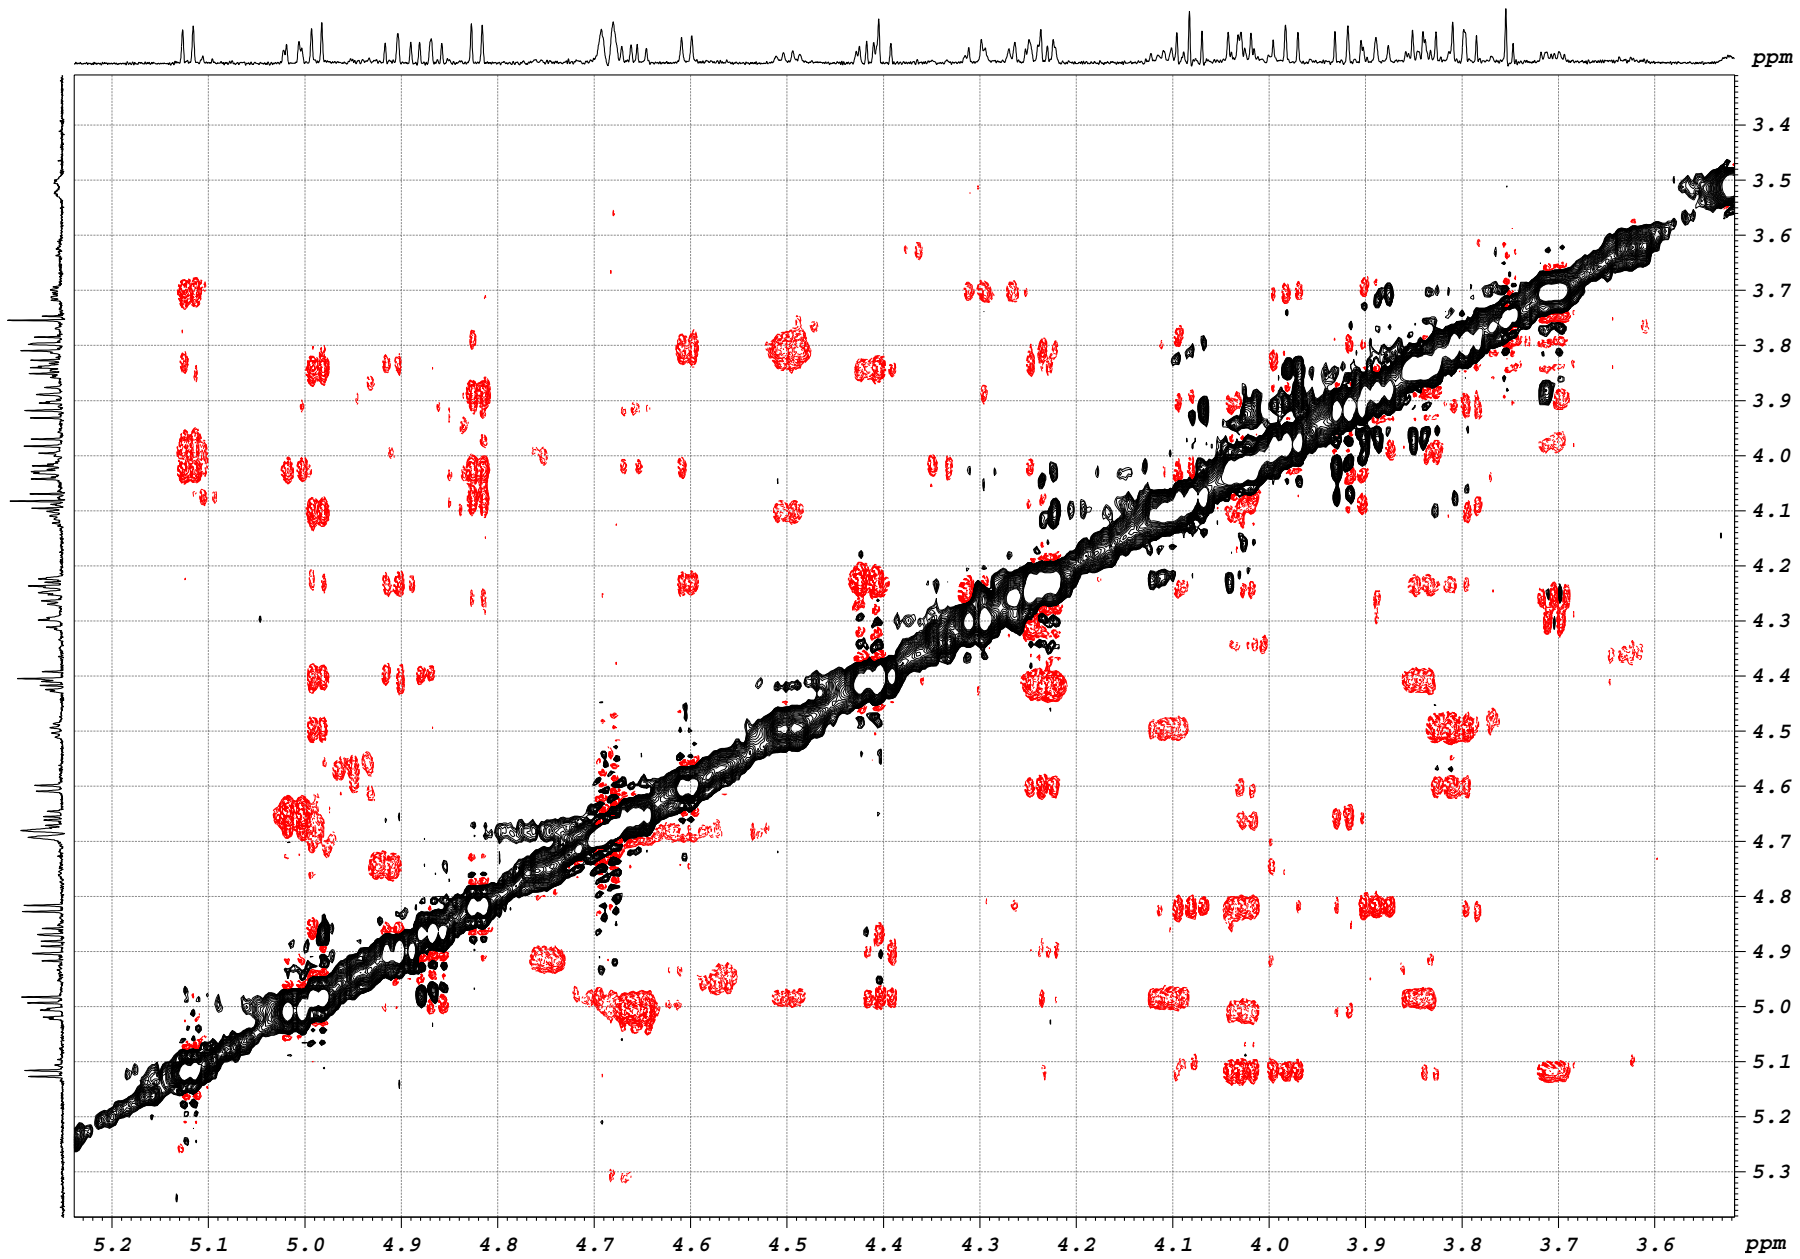

Figure 13. The ROESY (500.13 MHz) spectrum of the carbohydrate moiety of 3 in C<sub>5</sub>D<sub>5</sub>N/D<sub>2</sub>O (4/1).

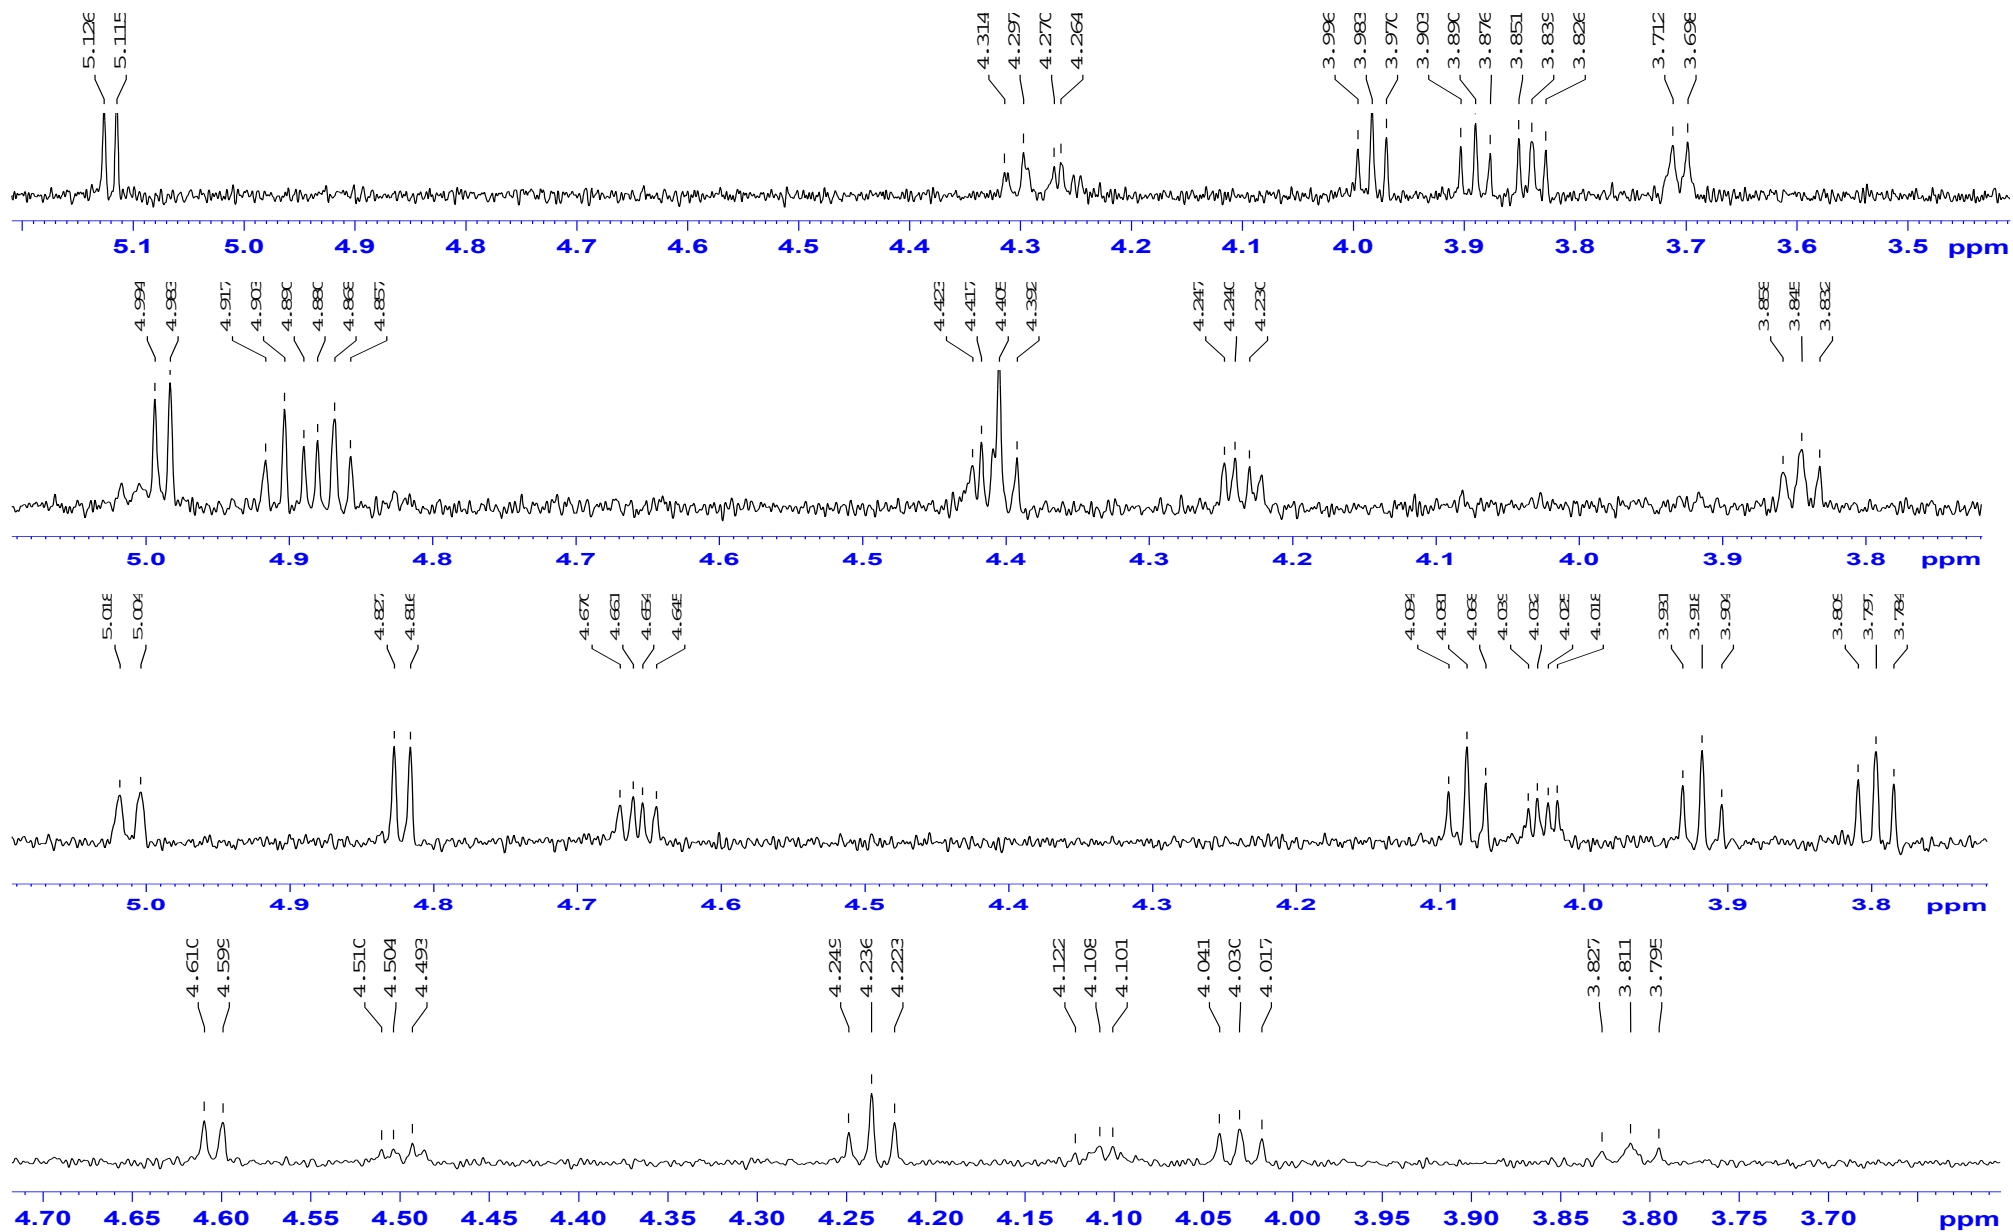

Figure 14. 1D TOCSY (700.13 MHz) spectra of the carbohydrate moiety of 3 in C<sub>5</sub>D<sub>5</sub>N/D<sub>2</sub>O (4/1).



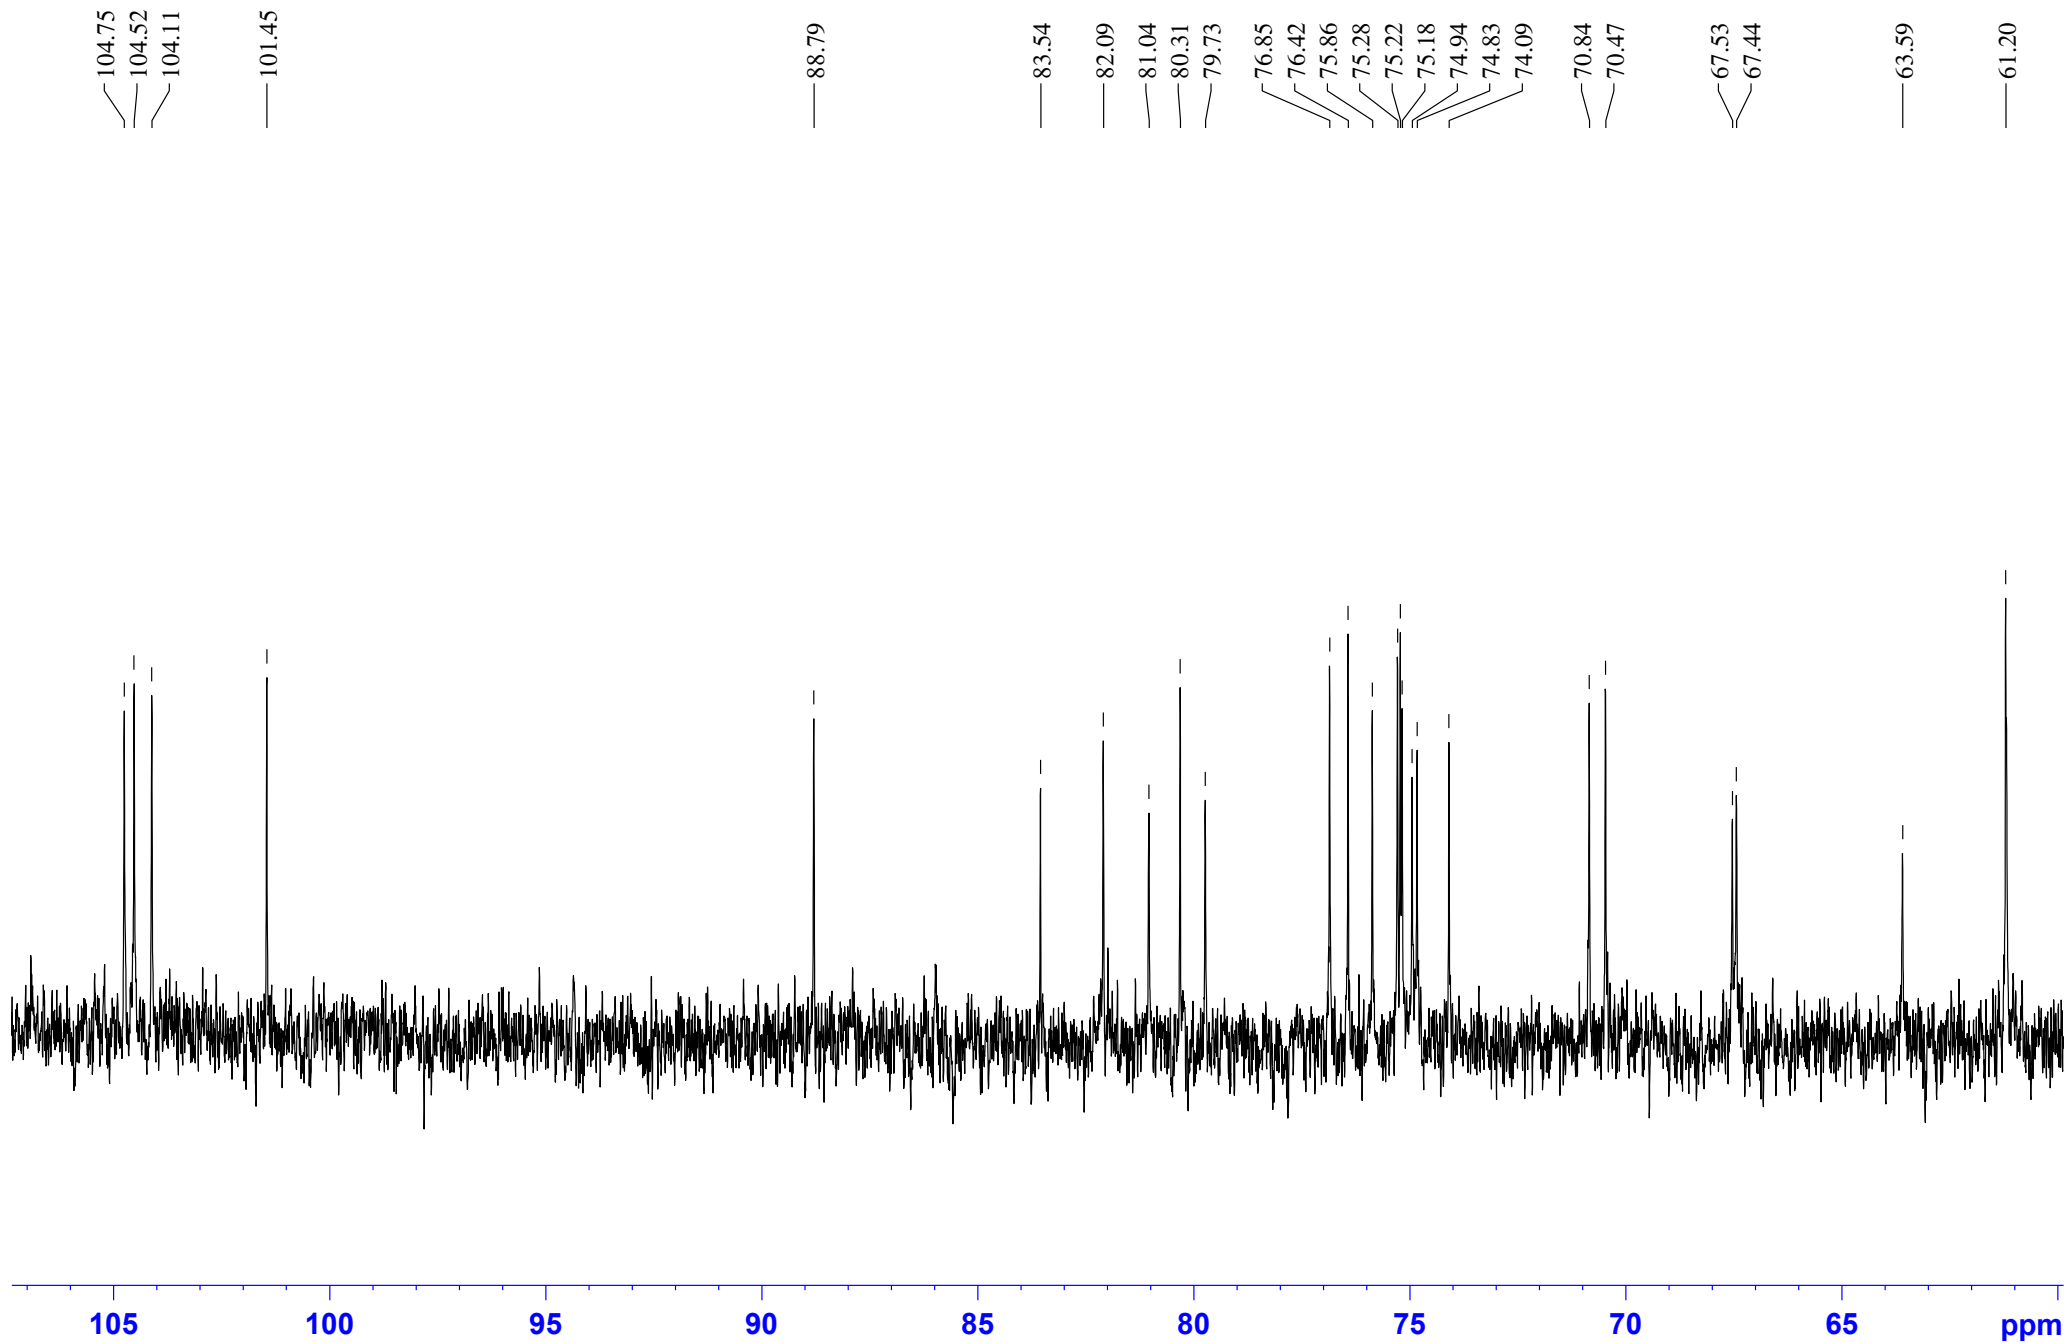

**Figure 15.** The  $^{13}\text{C}$  NMR (176.04 MHz) spectrum of the carbohydrate moiety of **4** in  $\text{C}_5\text{D}_5\text{N}/\text{D}_2\text{O}$  (4/1).

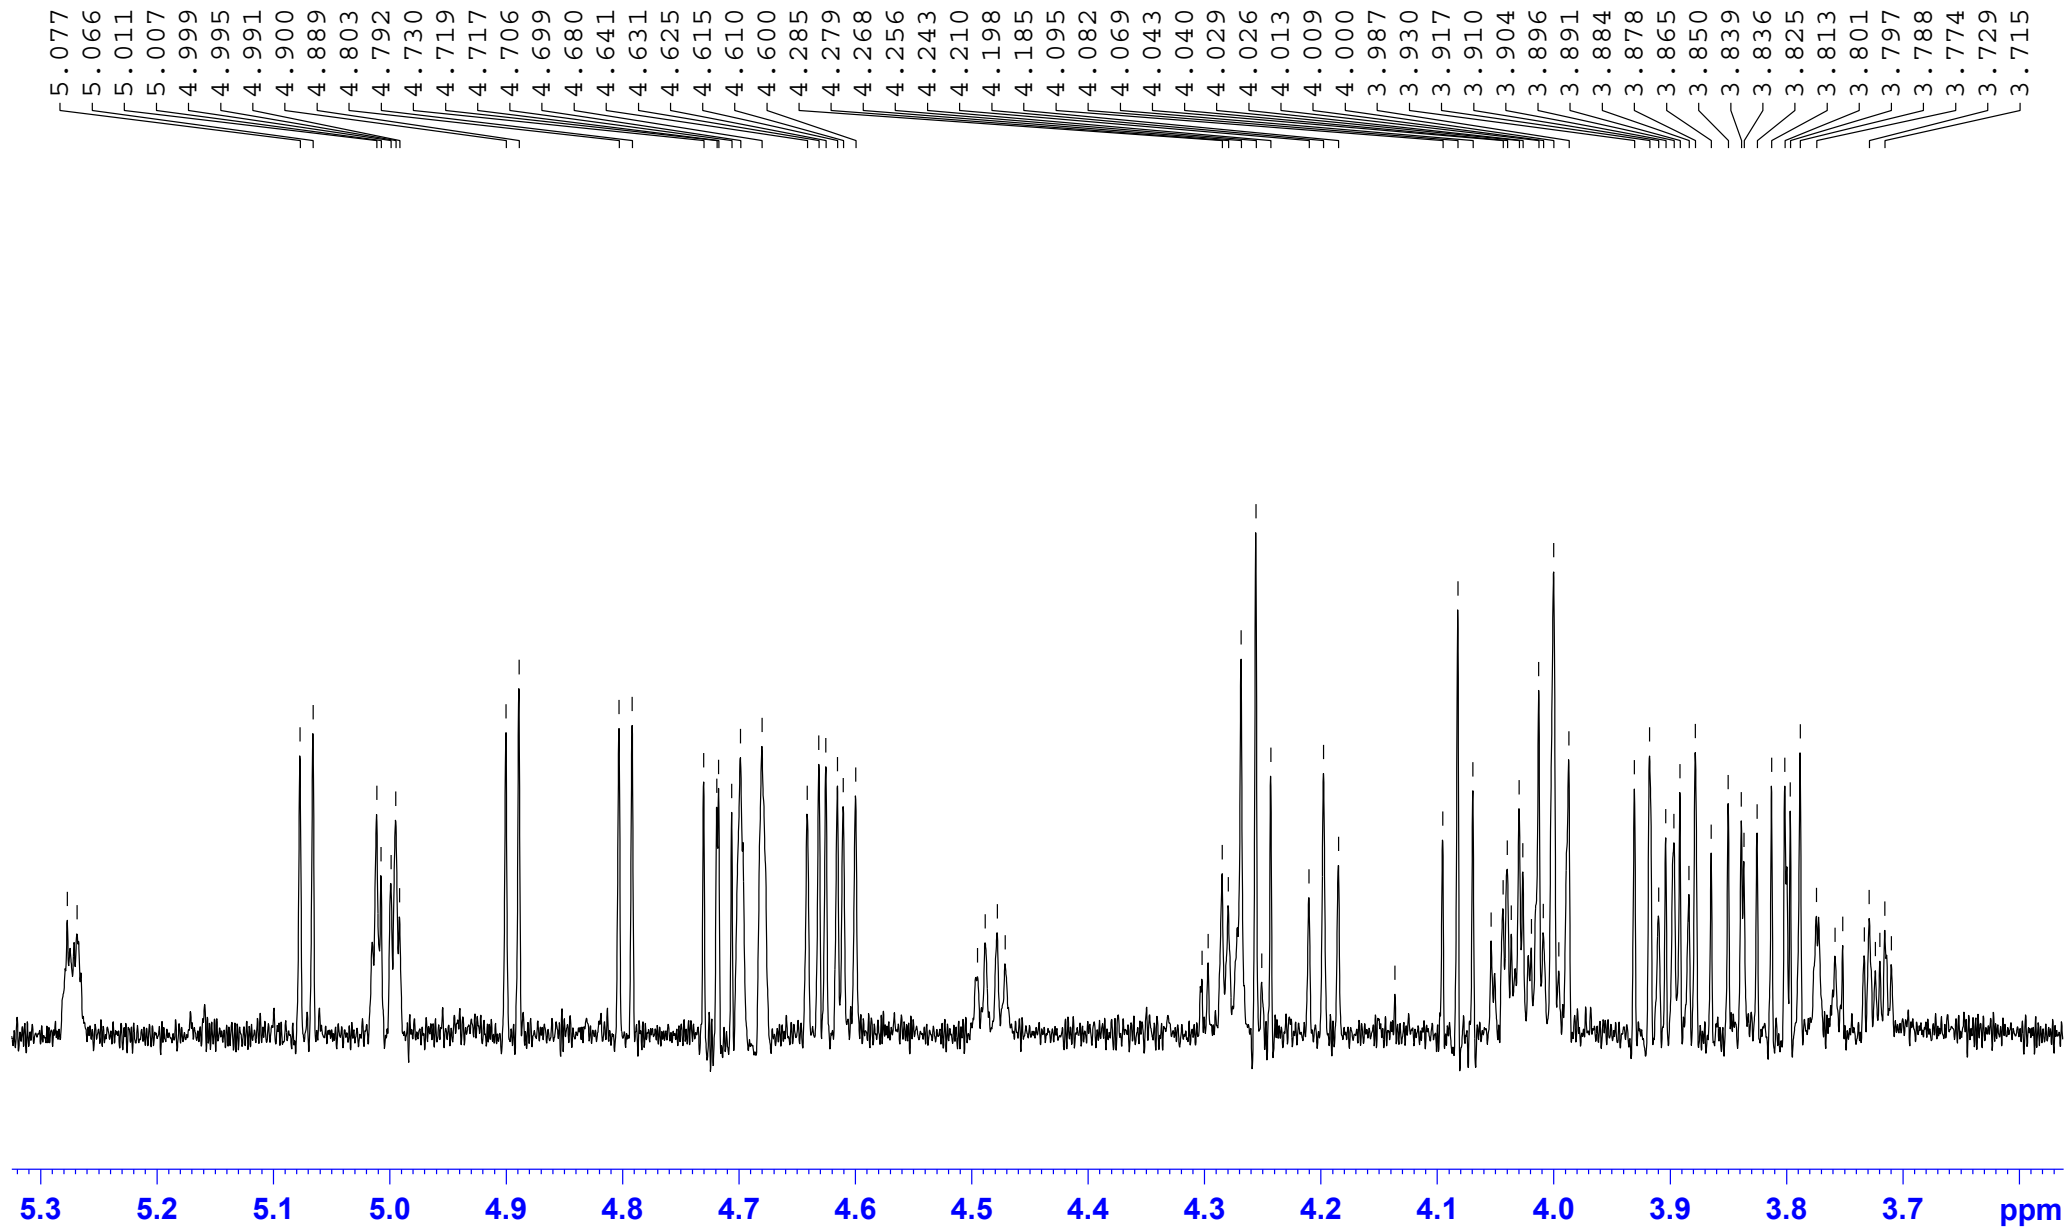

Figure 16. The  $^1\text{H}$  NMR (700.13 MHz) spectrum of the carbohydrate moiety of **4** in  $\text{C}_5\text{D}_5\text{N}/\text{D}_2\text{O}$  (4/1).

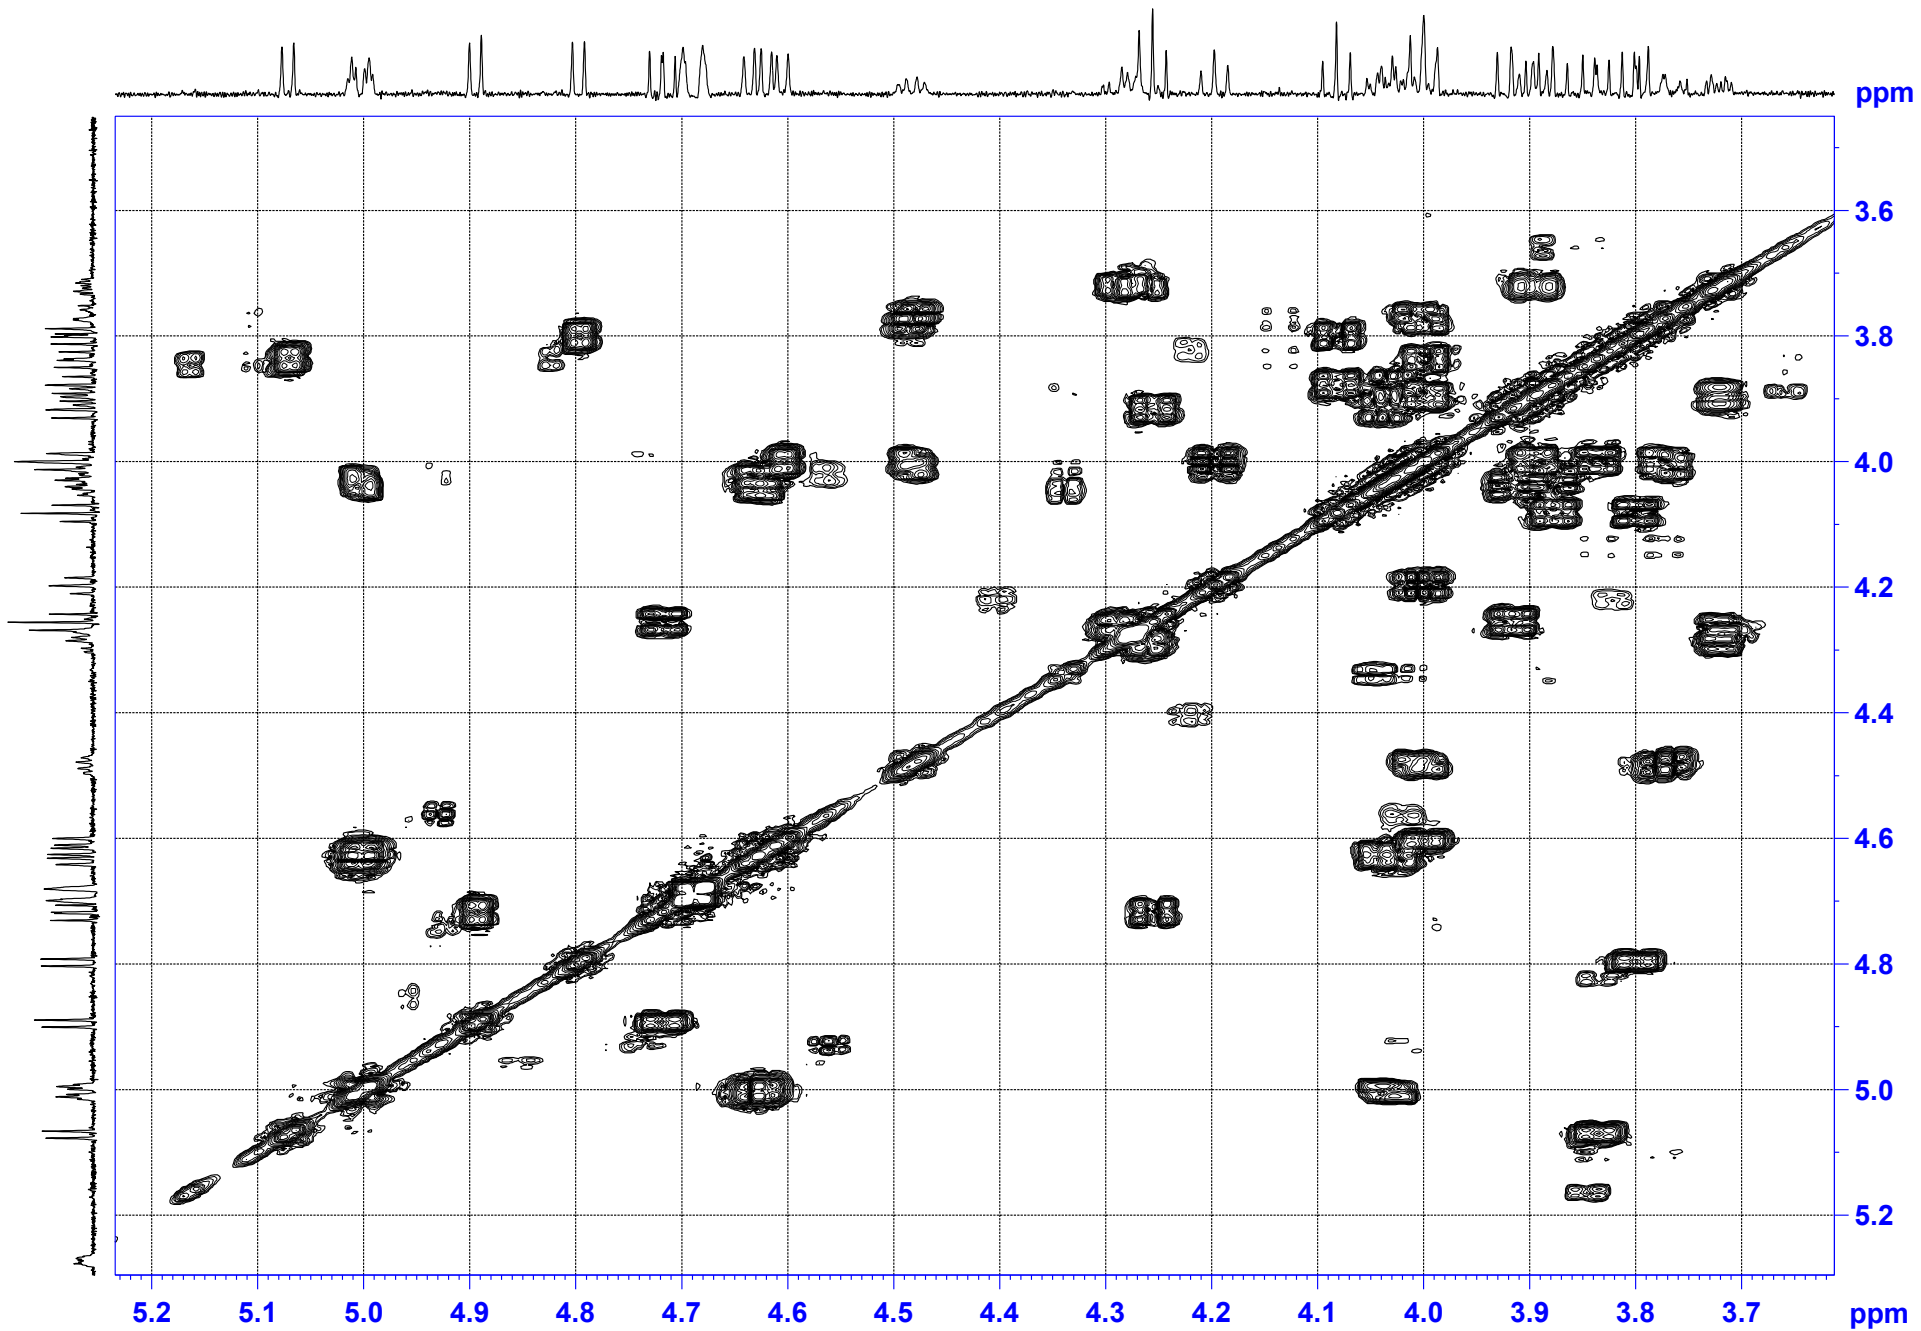

Figure 17. The COSY (700.13 MHz) spectrum of the carbohydrate moiety of 4 in C<sub>5</sub>D<sub>5</sub>N/D<sub>2</sub>O (4/1).

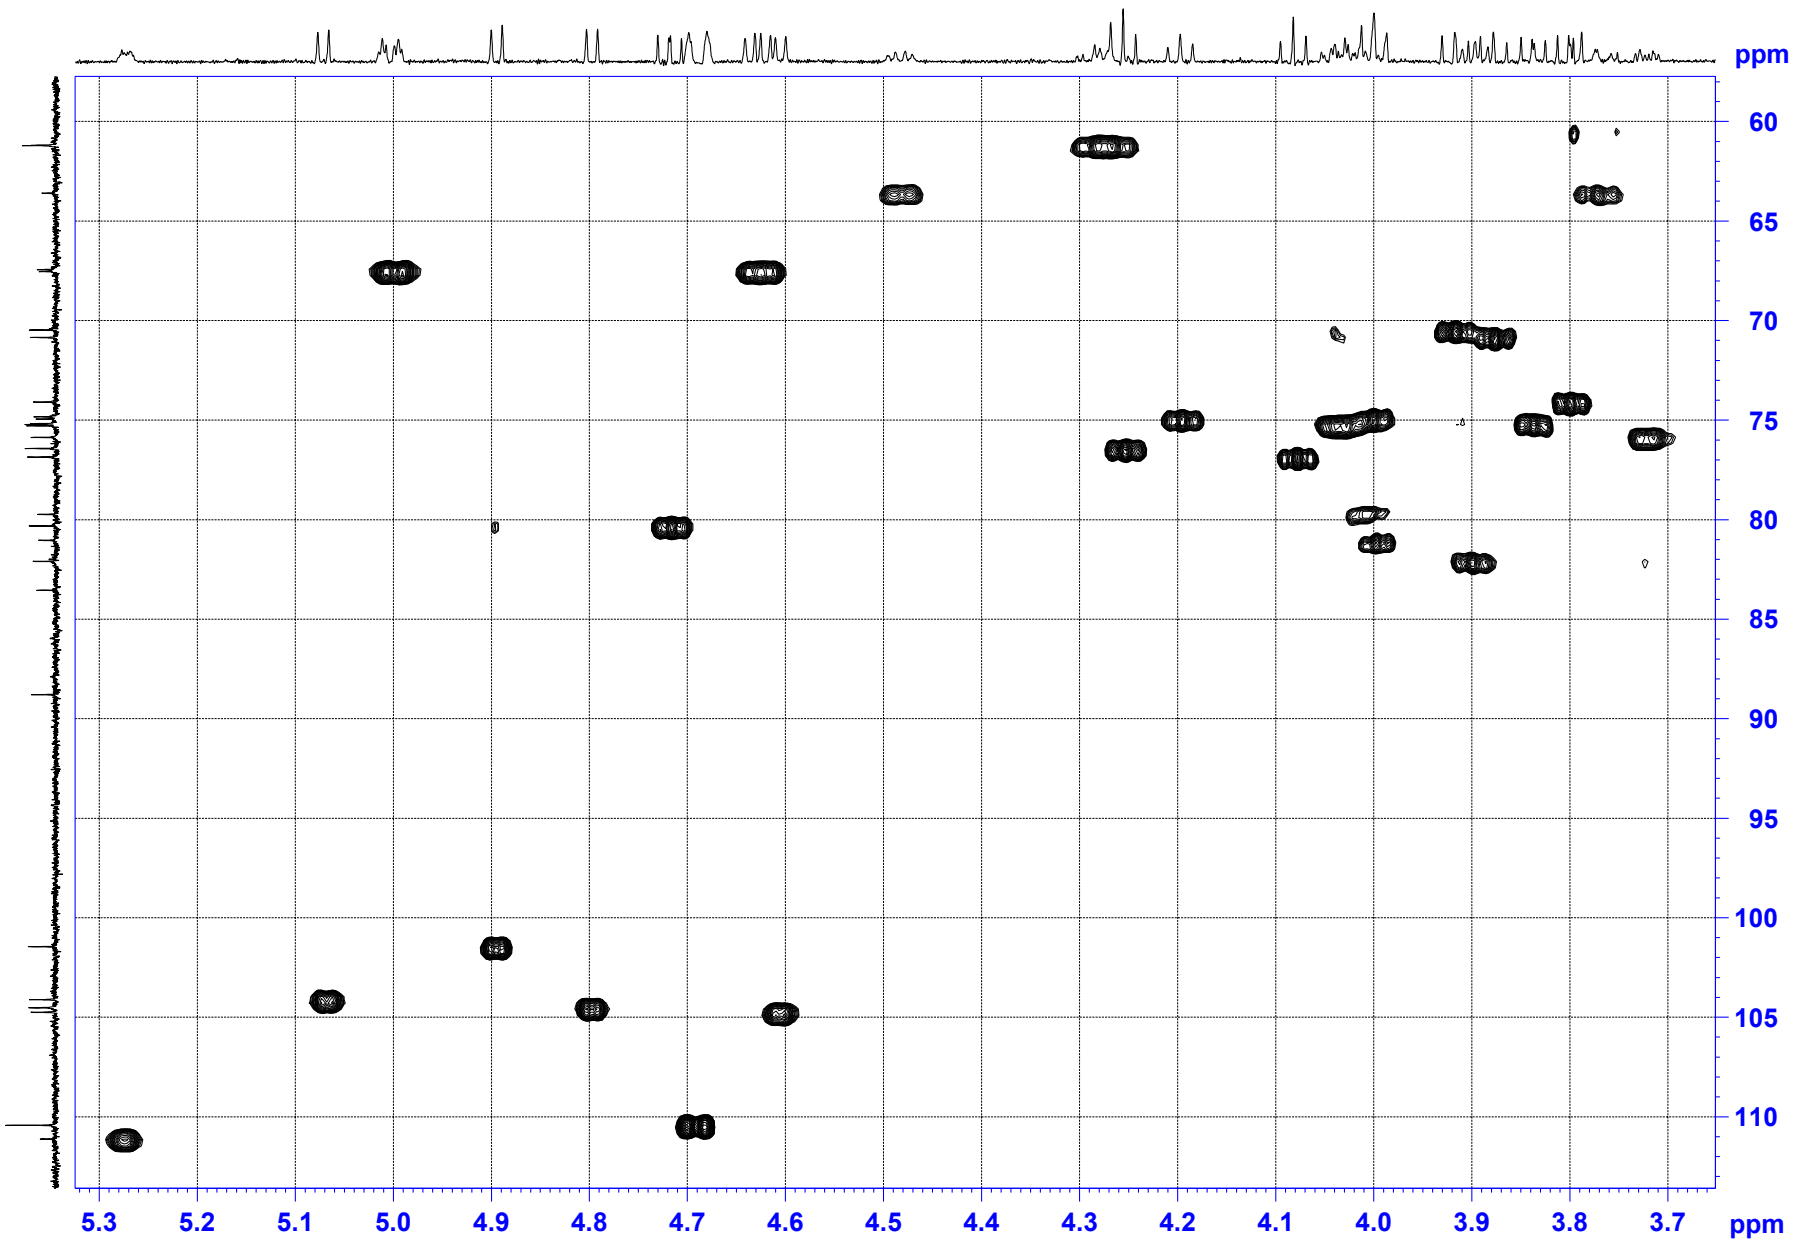

Figure 18. The HSQC (700.13 MHz) spectrum of the carbohydrate moiety of **4** in  $\text{C}_5\text{D}_5\text{N}/\text{D}_2\text{O}$  (4/1).

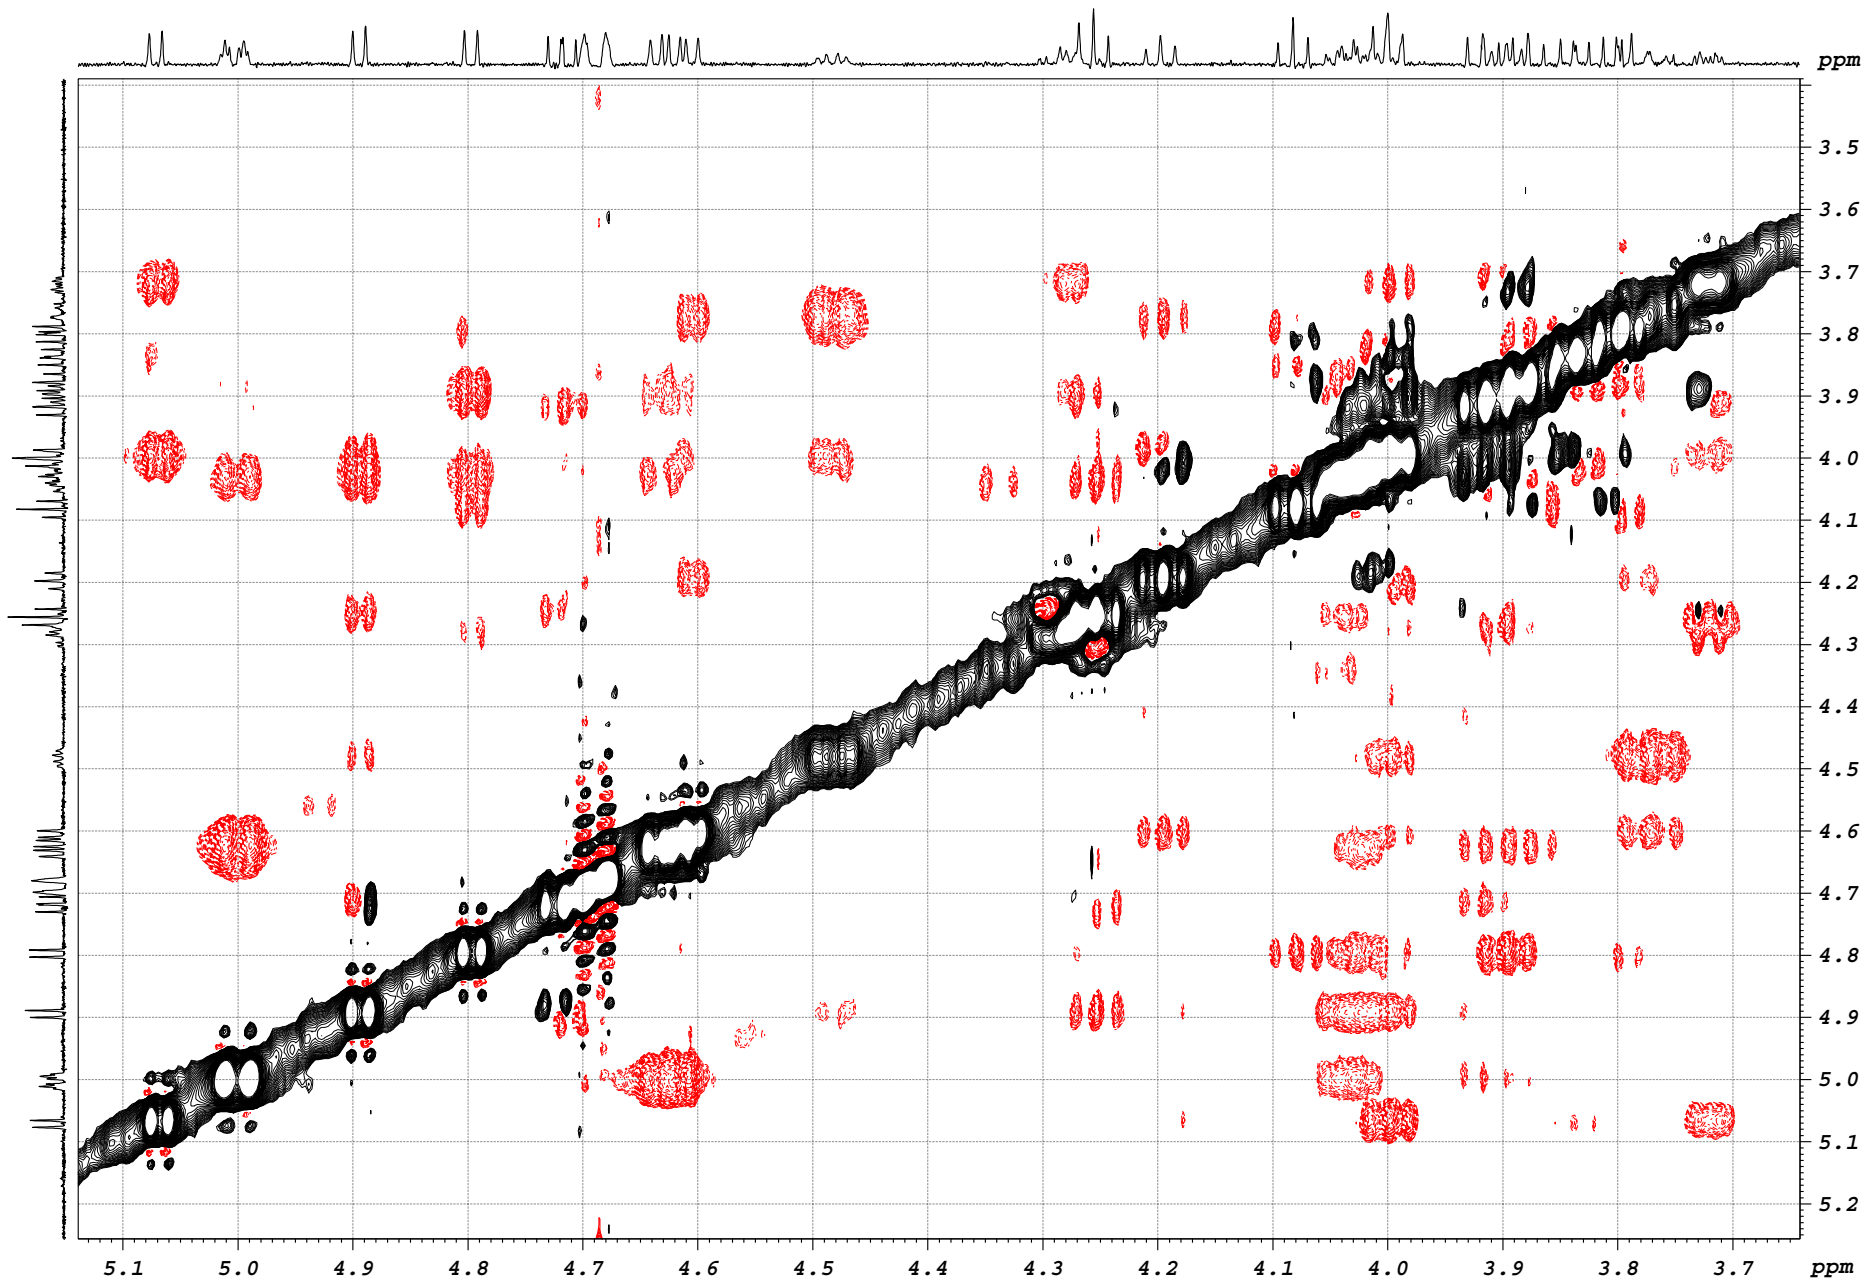

Figure 19. The ROESY (500.13 MHz) spectrum of the carbohydrate moiety of **4** in C<sub>5</sub>D<sub>5</sub>N/D<sub>2</sub>O (4/1).

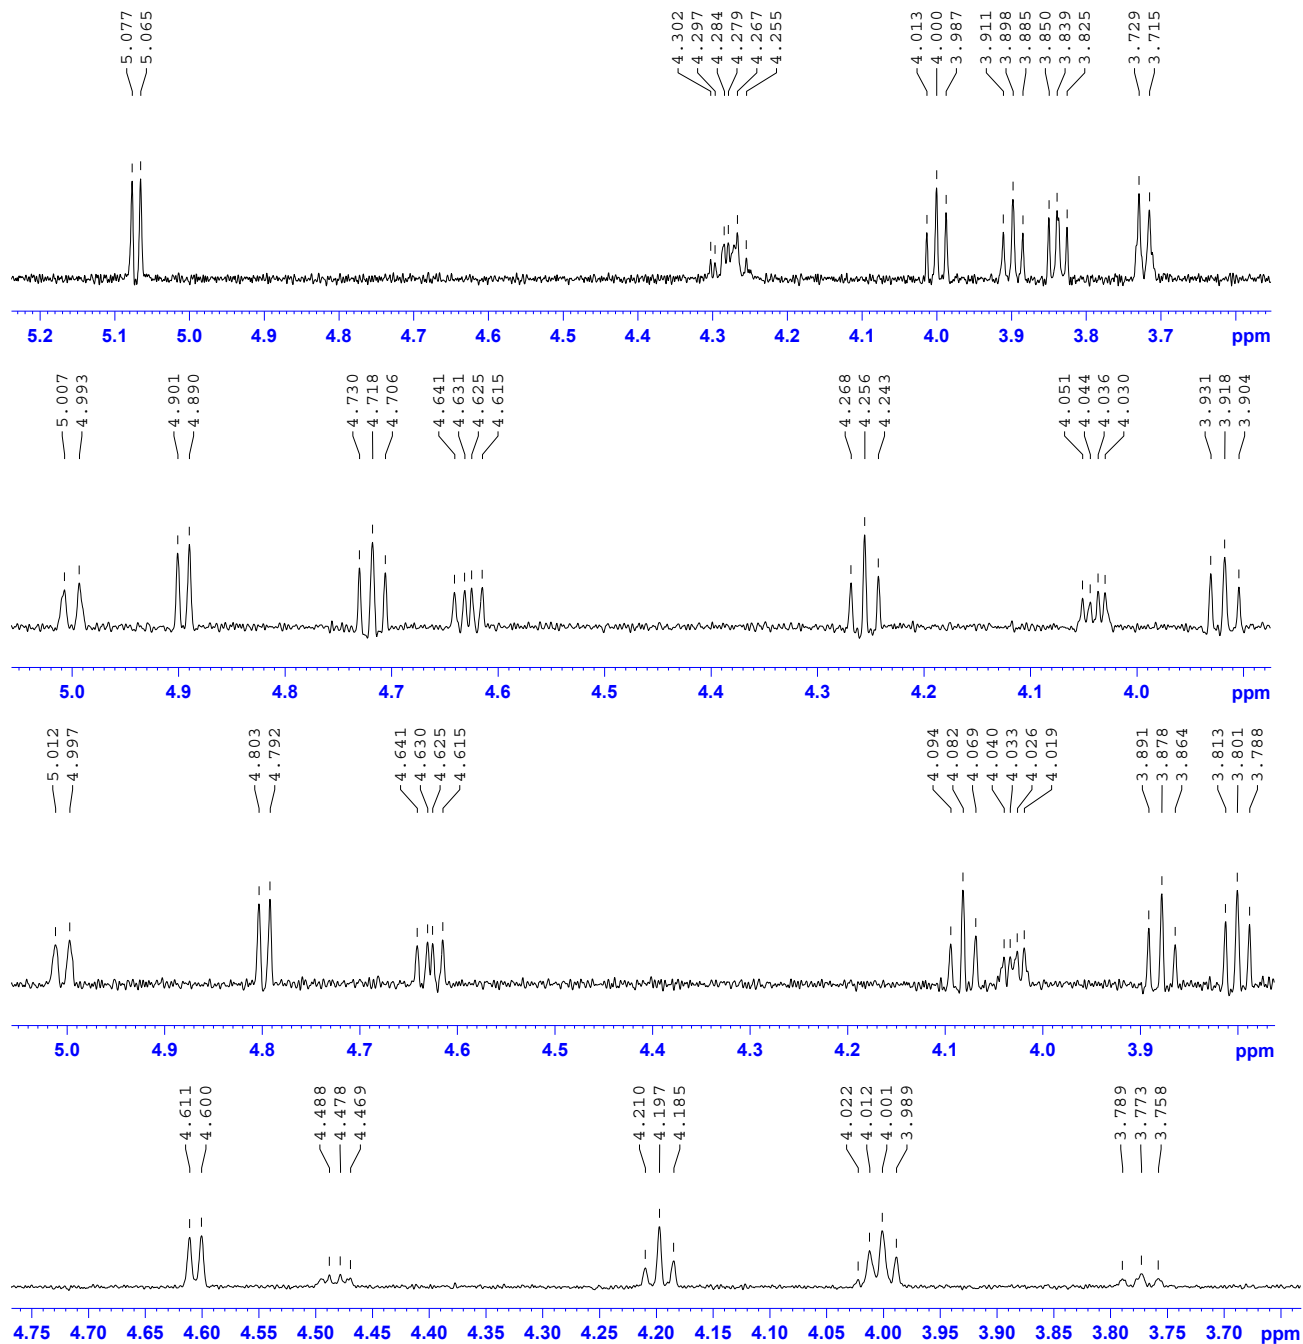

**Figure 20.** 1D TOCSY (700.13 MHz) spectra of the monosaccharide residues in **4** in  $C_5D_5N/D_2O$  (4/1).

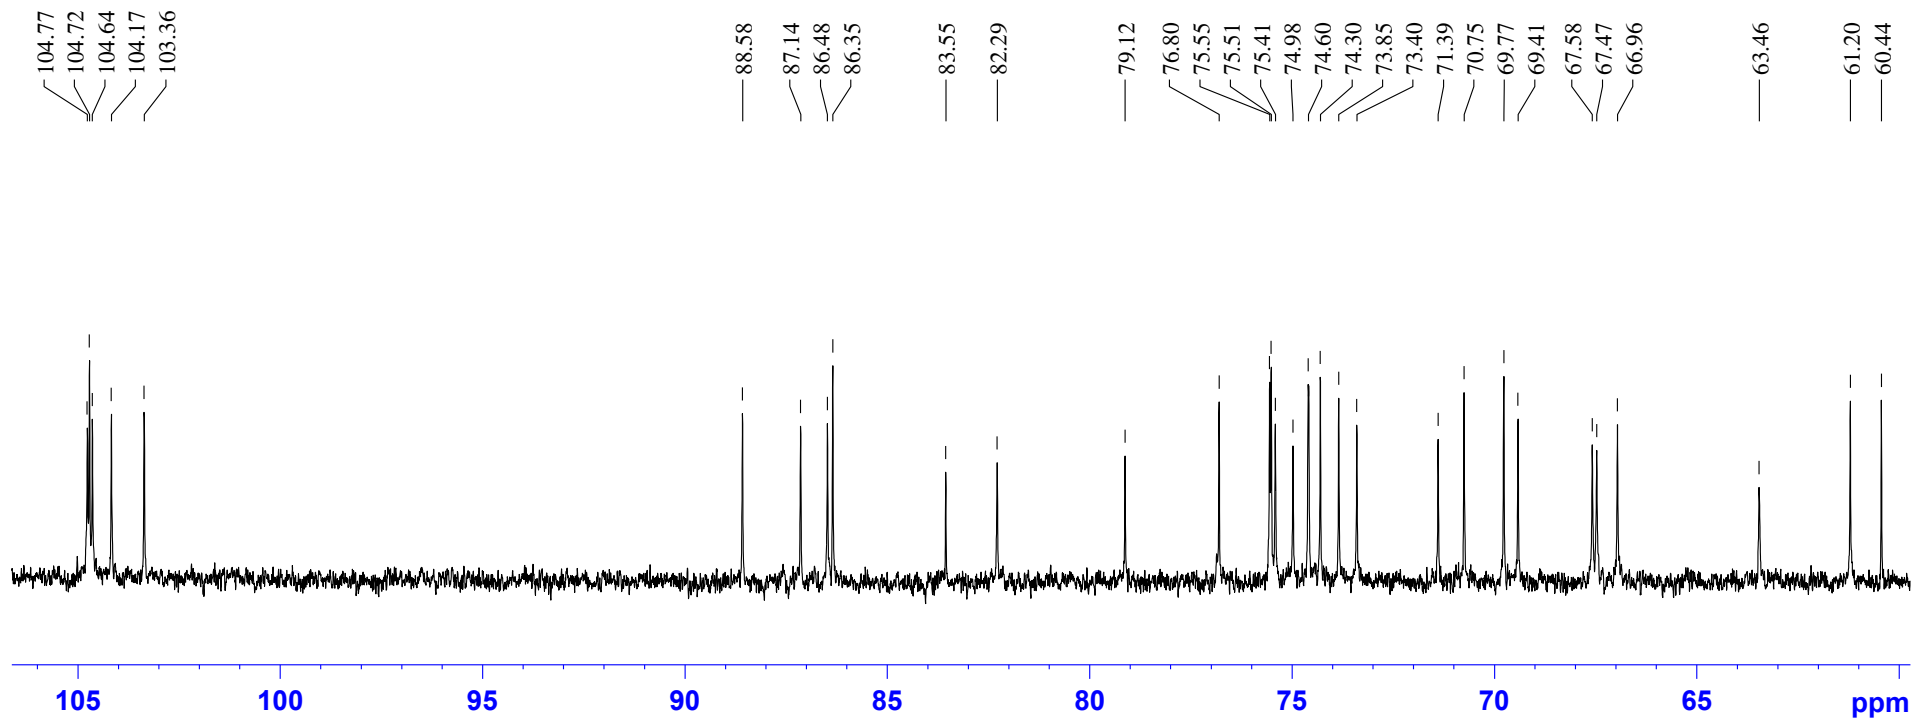

Figure 21. The  $^{13}\text{C}$  NMR (176.04 MHz) spectrum of the carbohydrate moiety of 5 in  $\text{C}_5\text{D}_5\text{N}/\text{D}_2\text{O}$  (4/1).

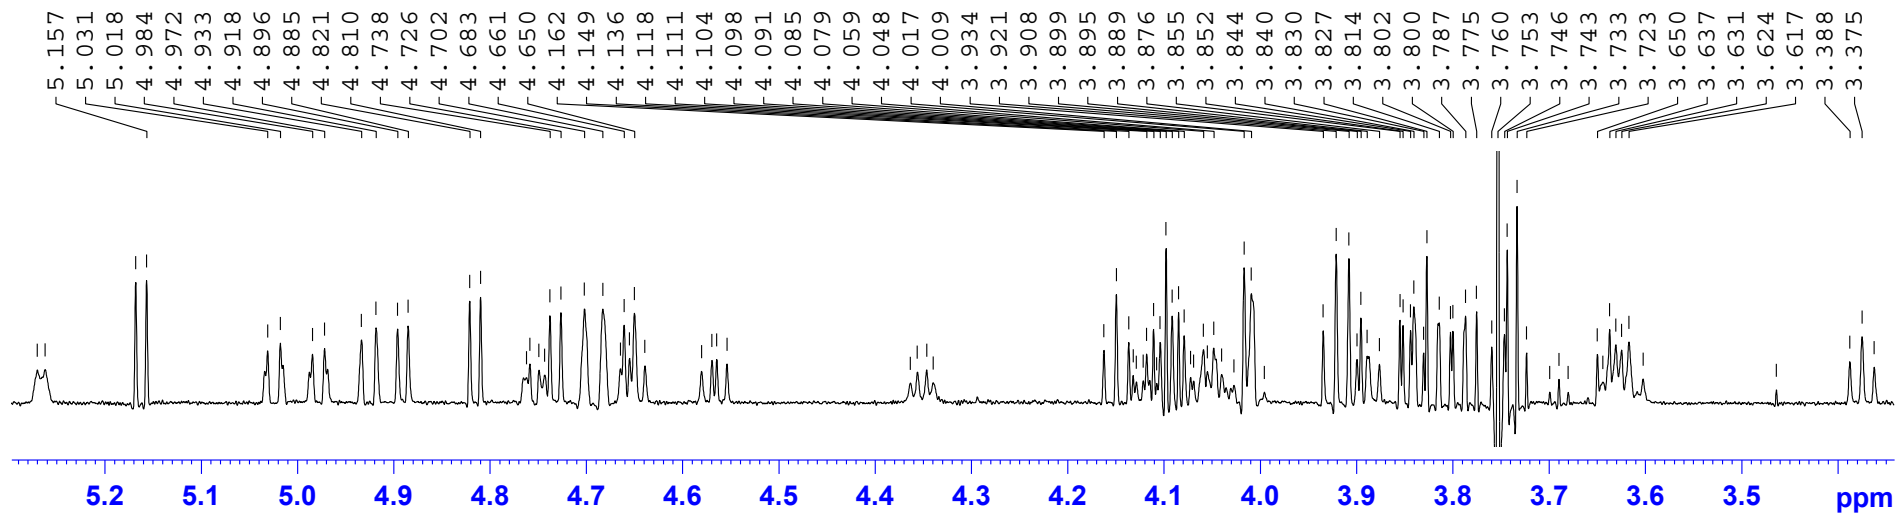

Figure 22. The  $^1\text{H}$  NMR (700.13 MHz) spectrum of the carbohydrate moiety of 5 in  $\text{C}_5\text{D}_5\text{N}/\text{D}_2\text{O}$  (4/1).

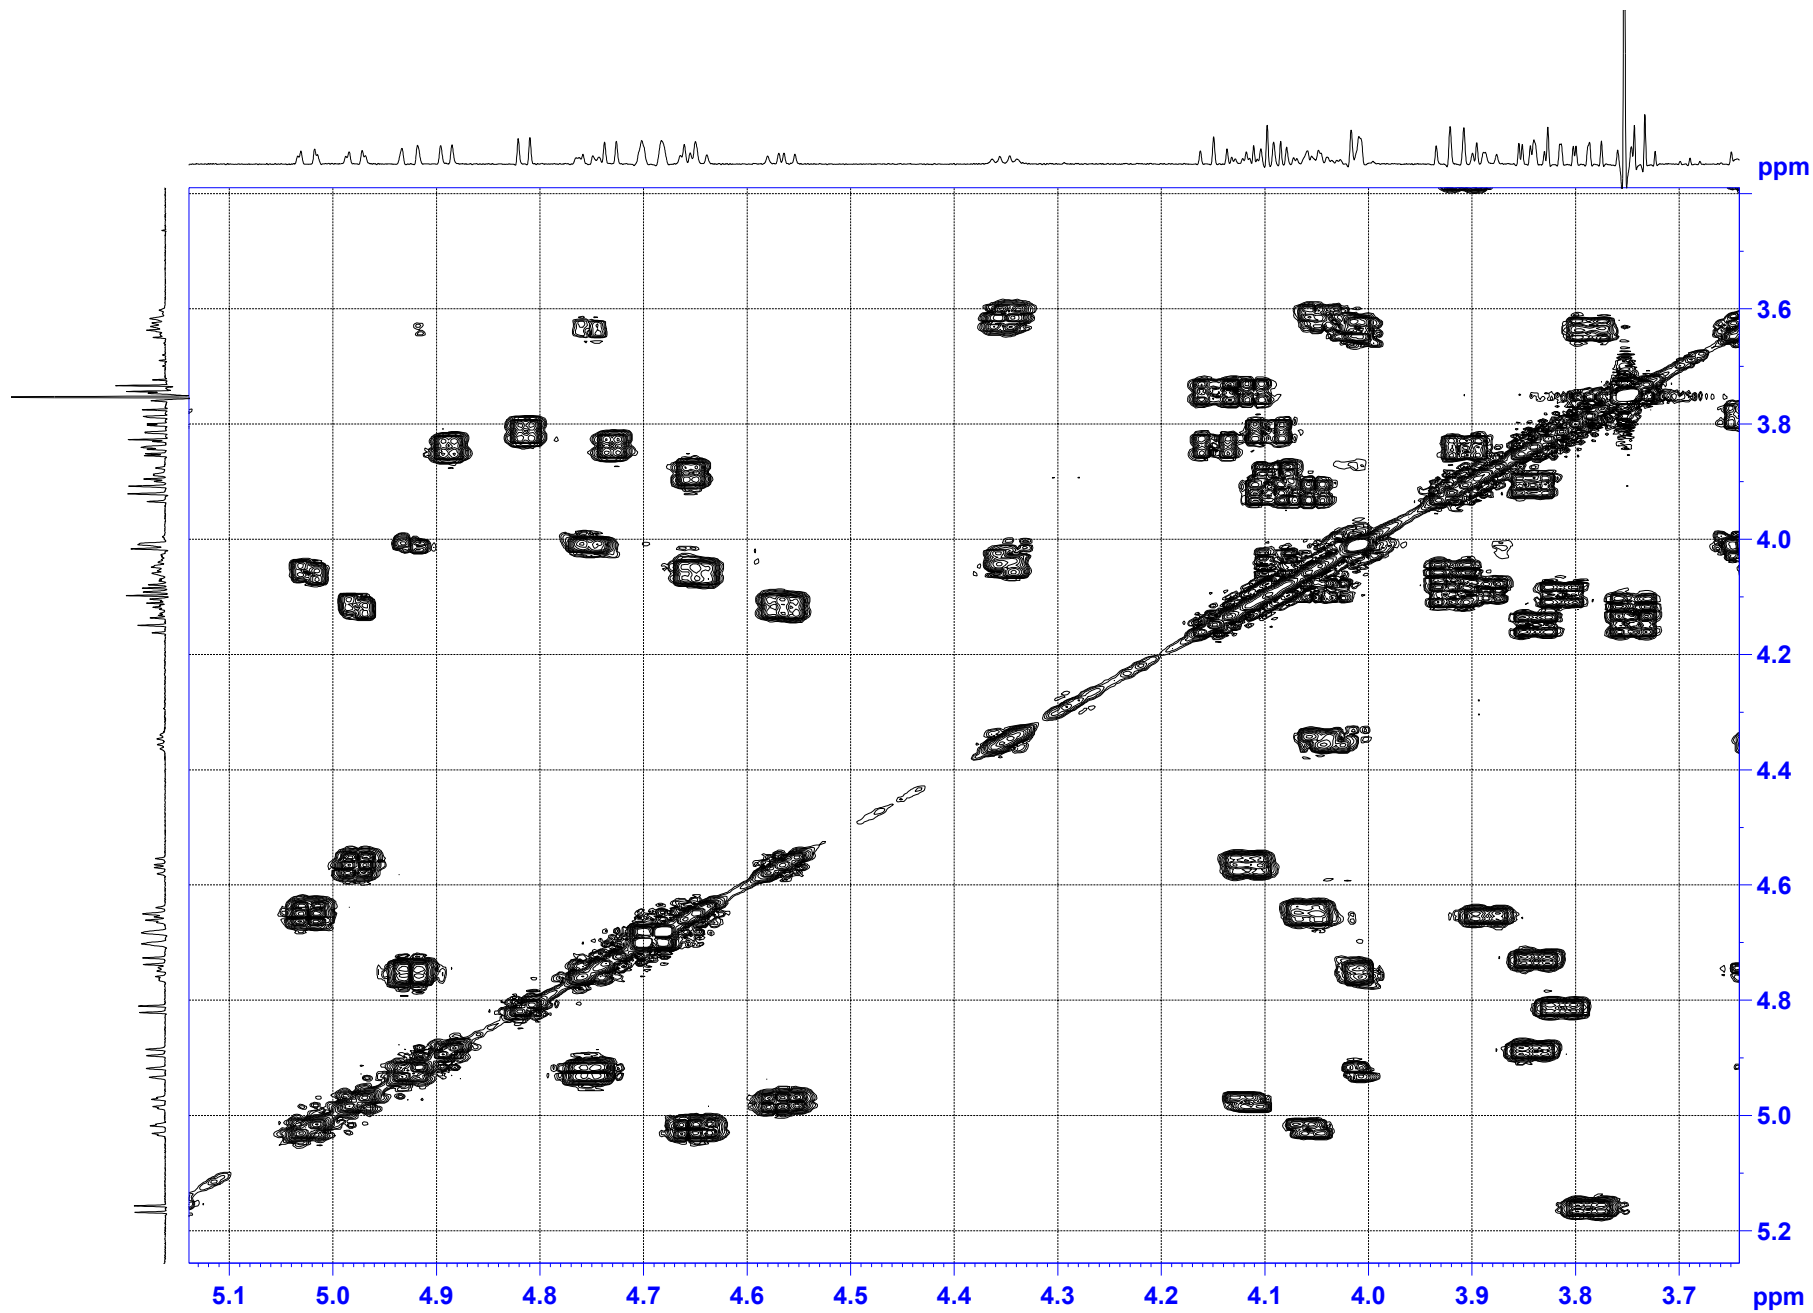

Figure 23. The COSY (700.13 MHz) spectrum of the carbohydrate moiety of **5** in  $C_5D_5N/D_2O$  (4/1).



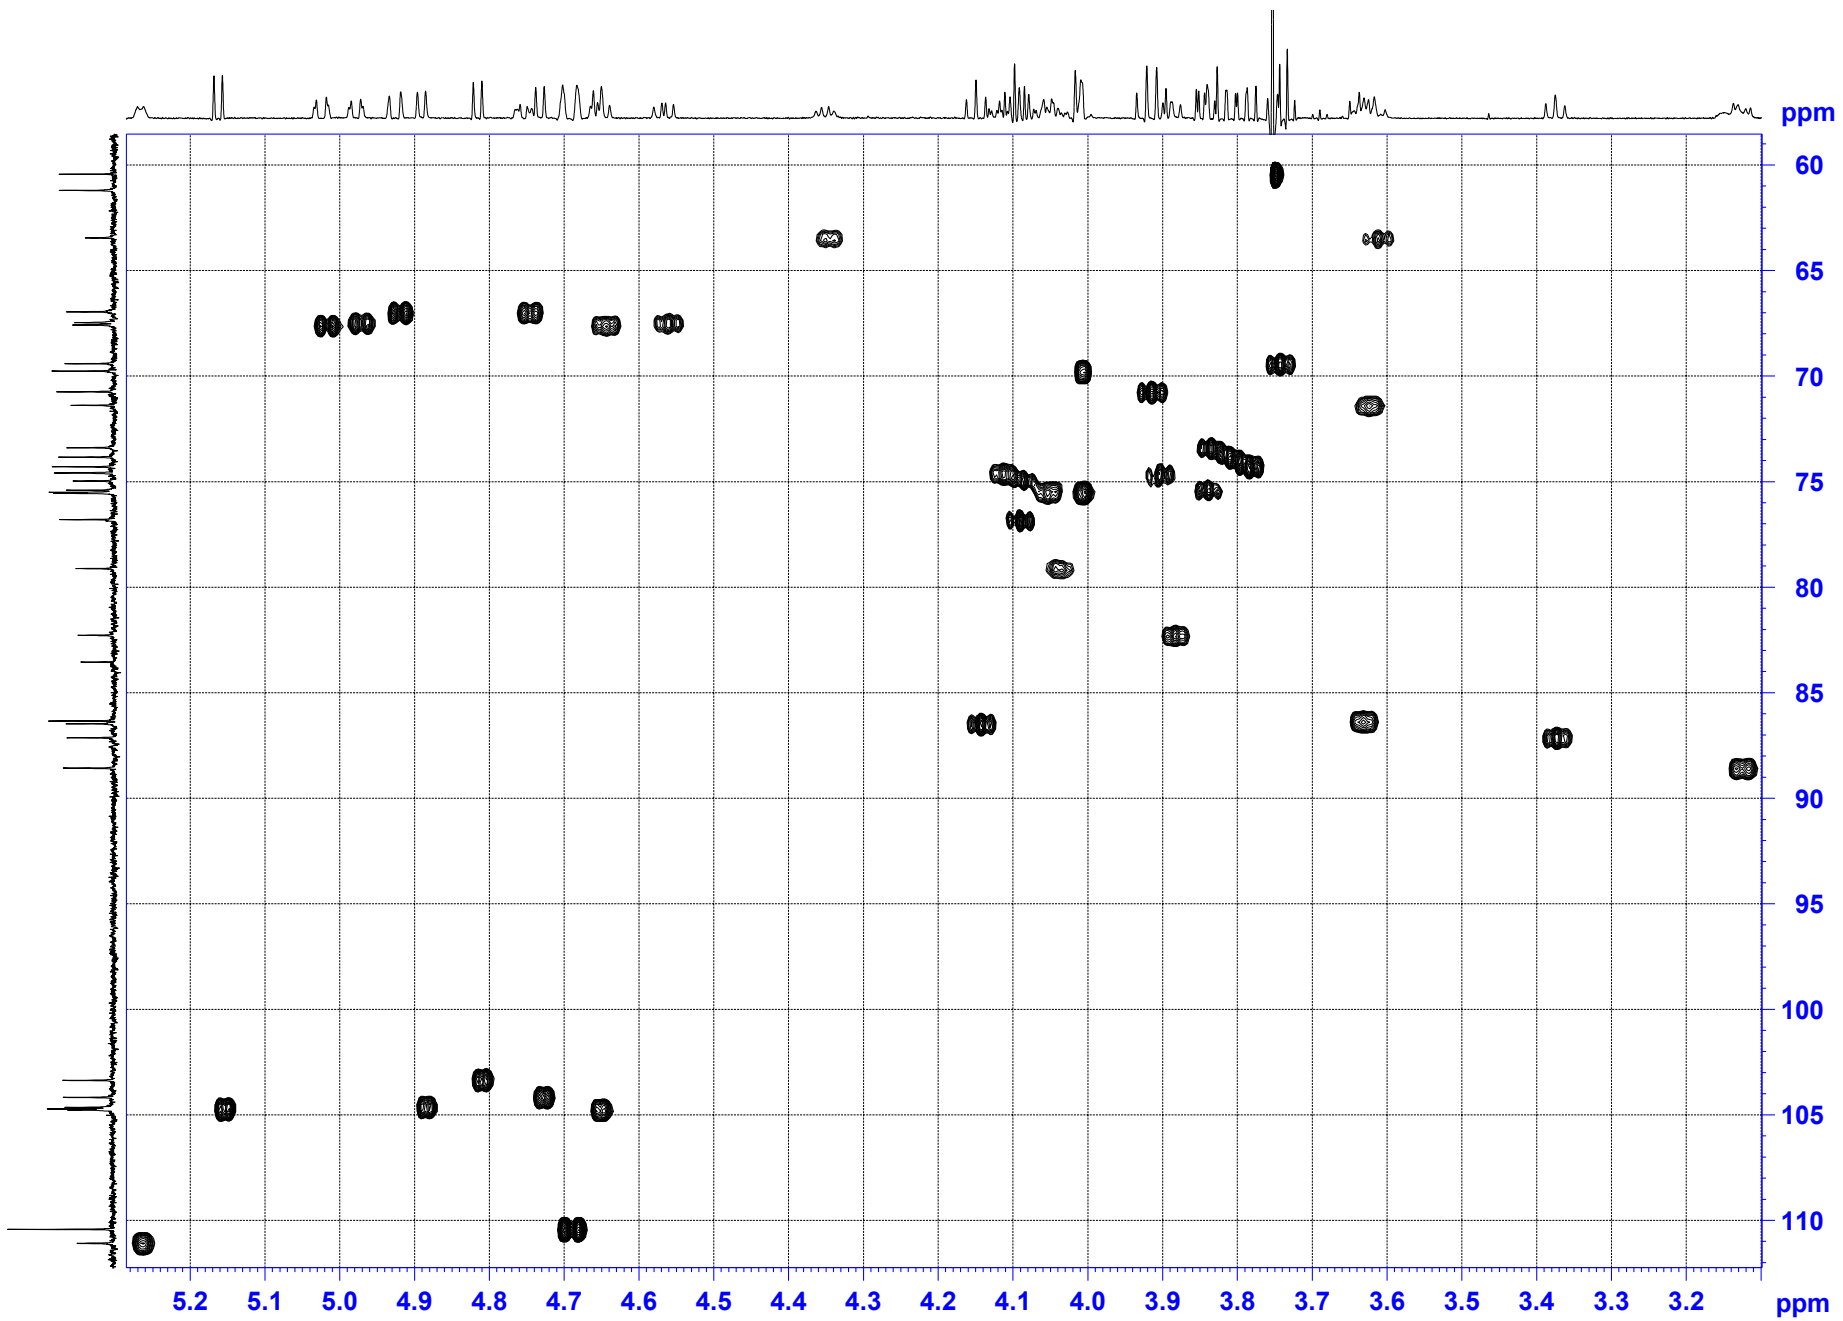

Figure 24. The HSQC (700.13 MHz) spectrum of the carbohydrate moiety of 5 in C<sub>5</sub>D<sub>5</sub>N/D<sub>2</sub>O (4/1).

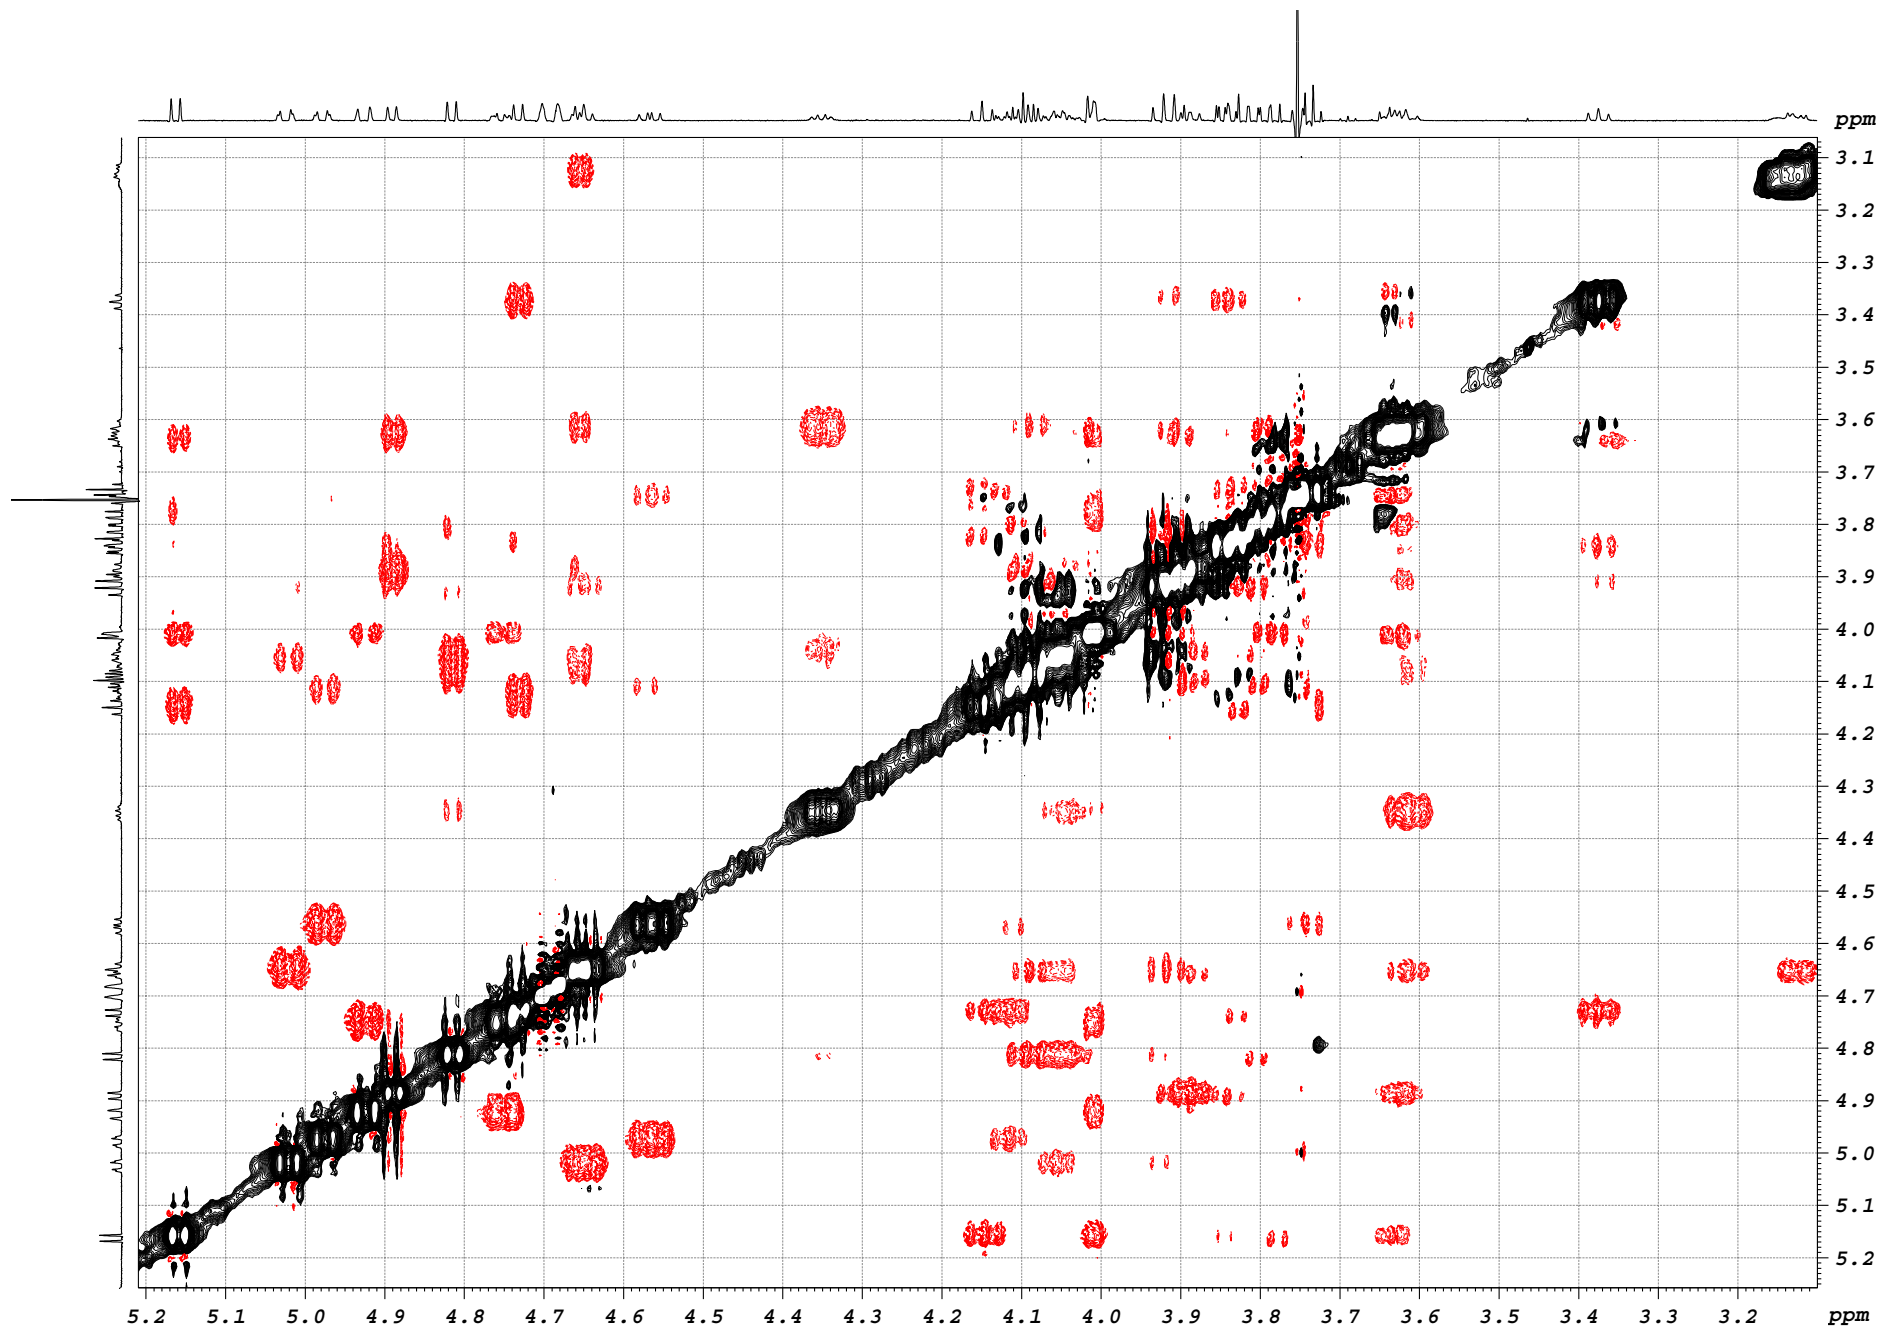

Figure 25. The ROESY (500.13 MHz) spectrum of the carbohydrate moiety of **5** in C<sub>5</sub>D<sub>5</sub>N/D<sub>2</sub>O (4/1).

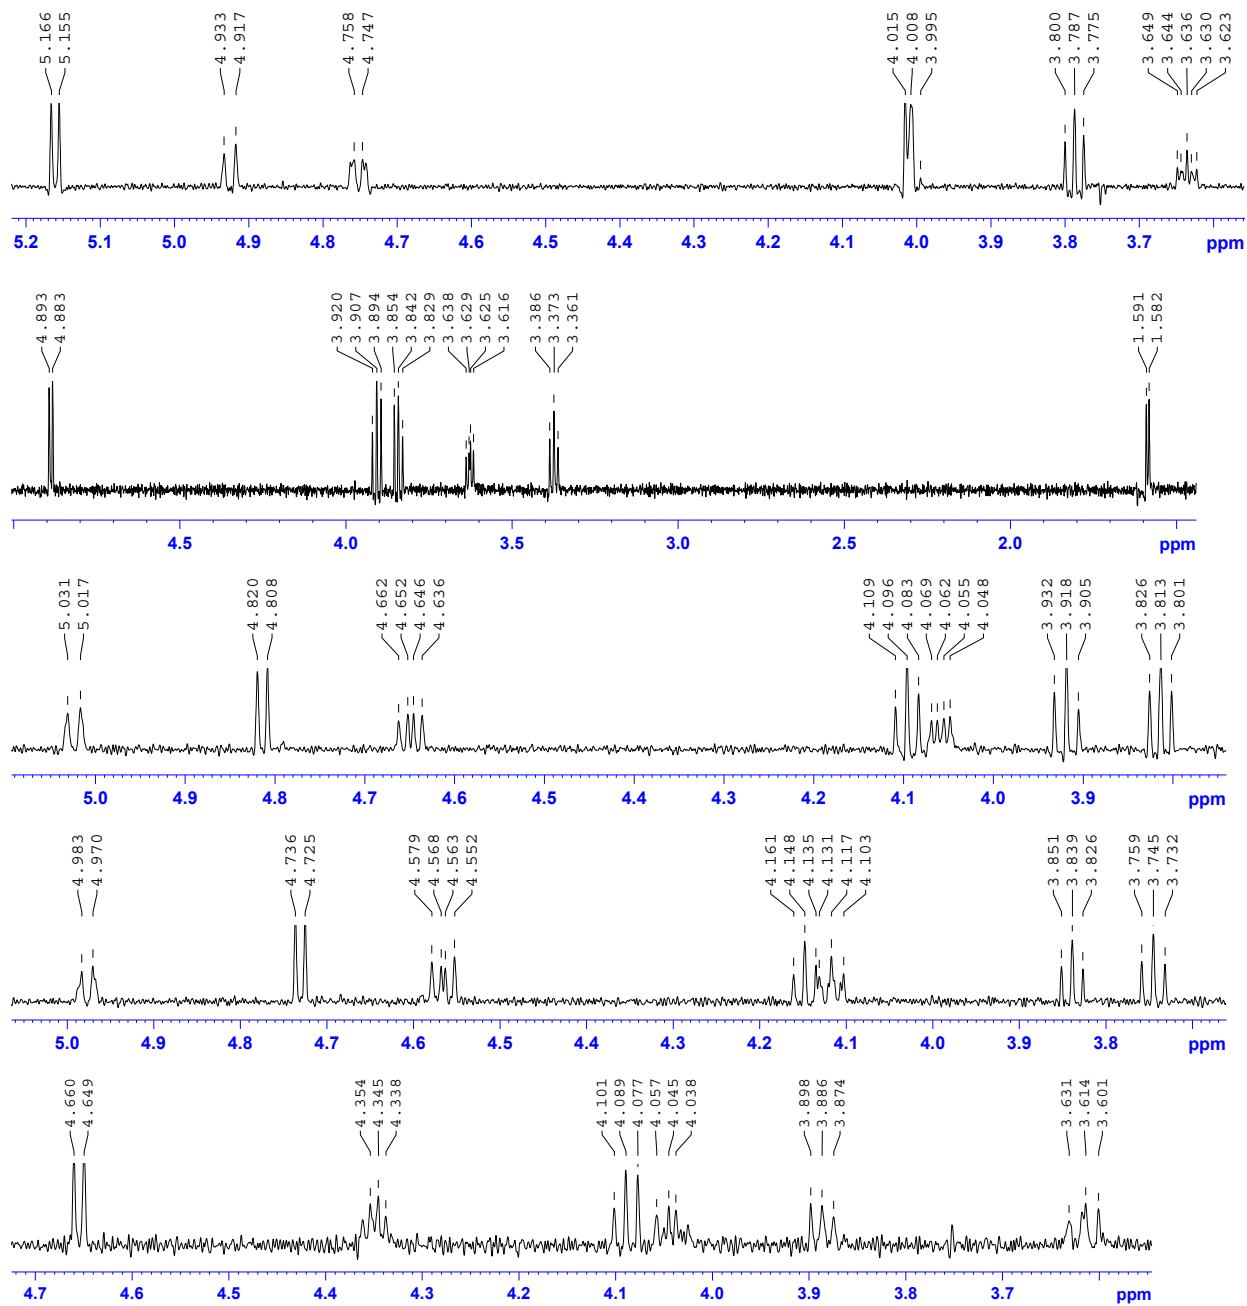

Figure 26. 1D TOCSY (700.13 MHz) spectra of the monosaccharide residues in **5** in  $C_5D_5N/D_2O$  (4/1).

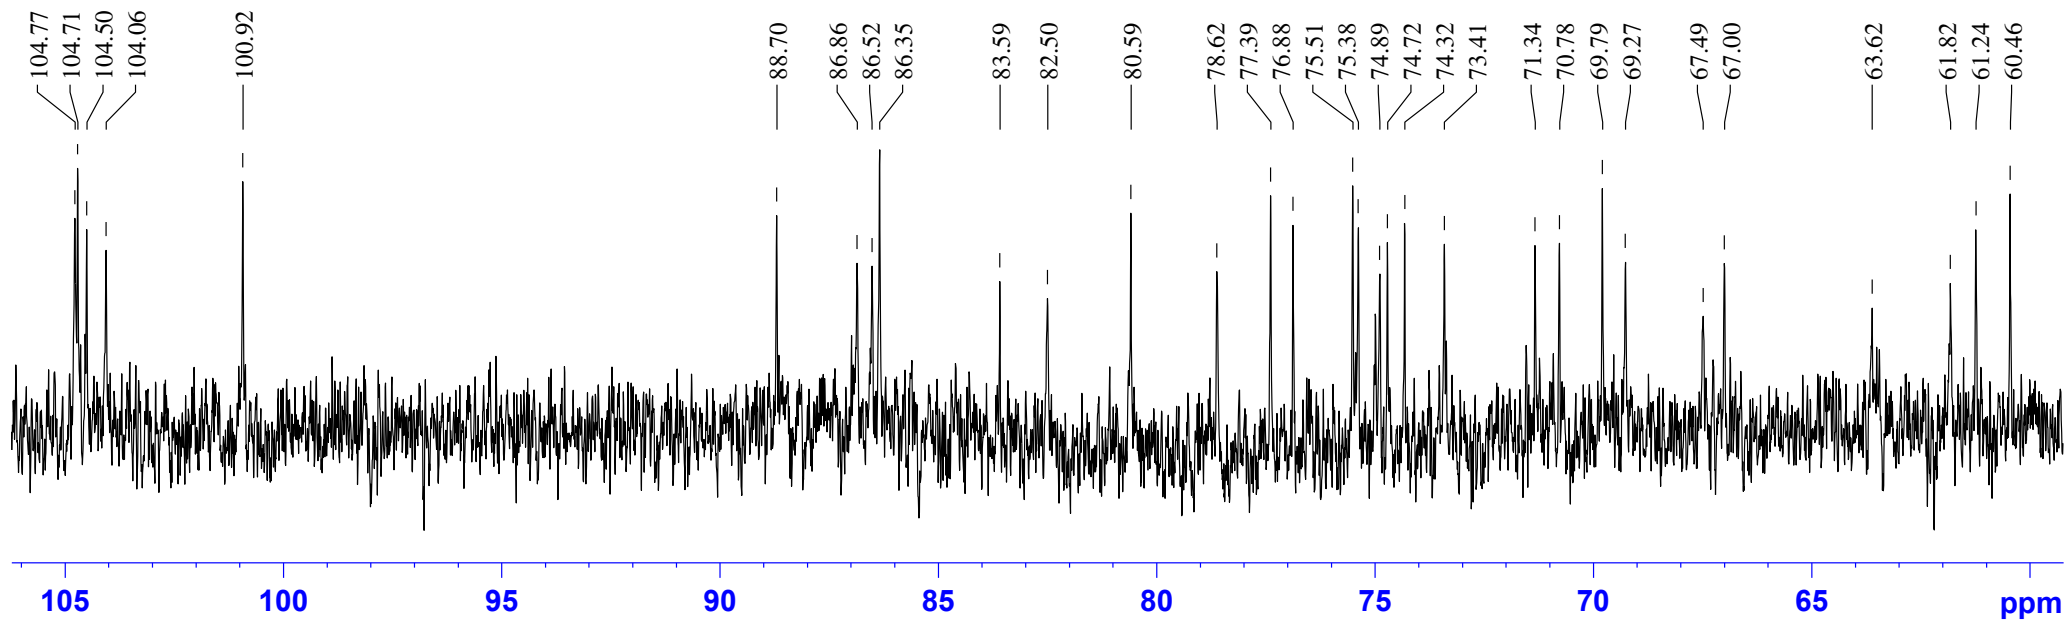

Figure 27. The  $^{13}\text{C}$  NMR (176.04 MHz) spectrum of the carbohydrate moiety of **6** in  $\text{C}_5\text{D}_5\text{N}/\text{D}_2\text{O}$  (4/1).

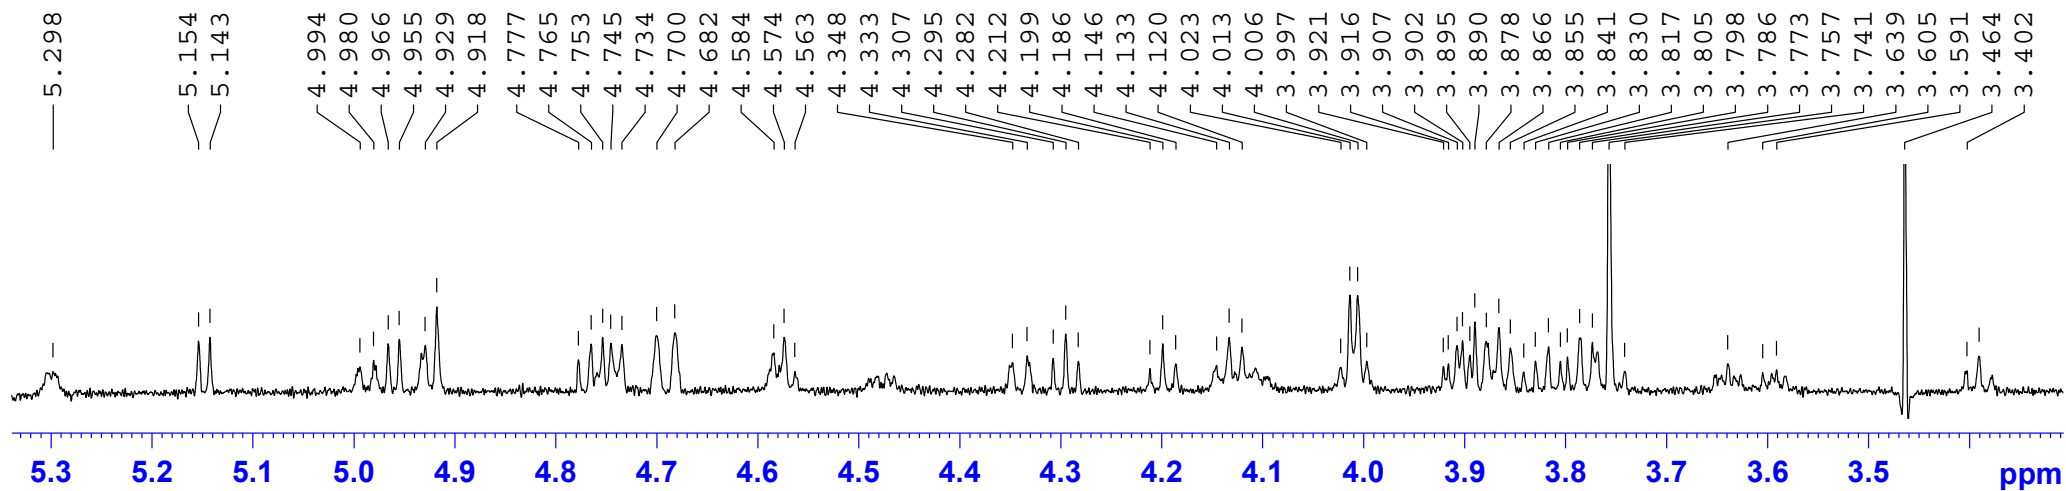

Figure 28. The  $^1\text{H}$  NMR (700.13 MHz) spectrum of the carbohydrate moiety of **6** in  $\text{C}_5\text{D}_5\text{N}/\text{D}_2\text{O}$  (4/1).

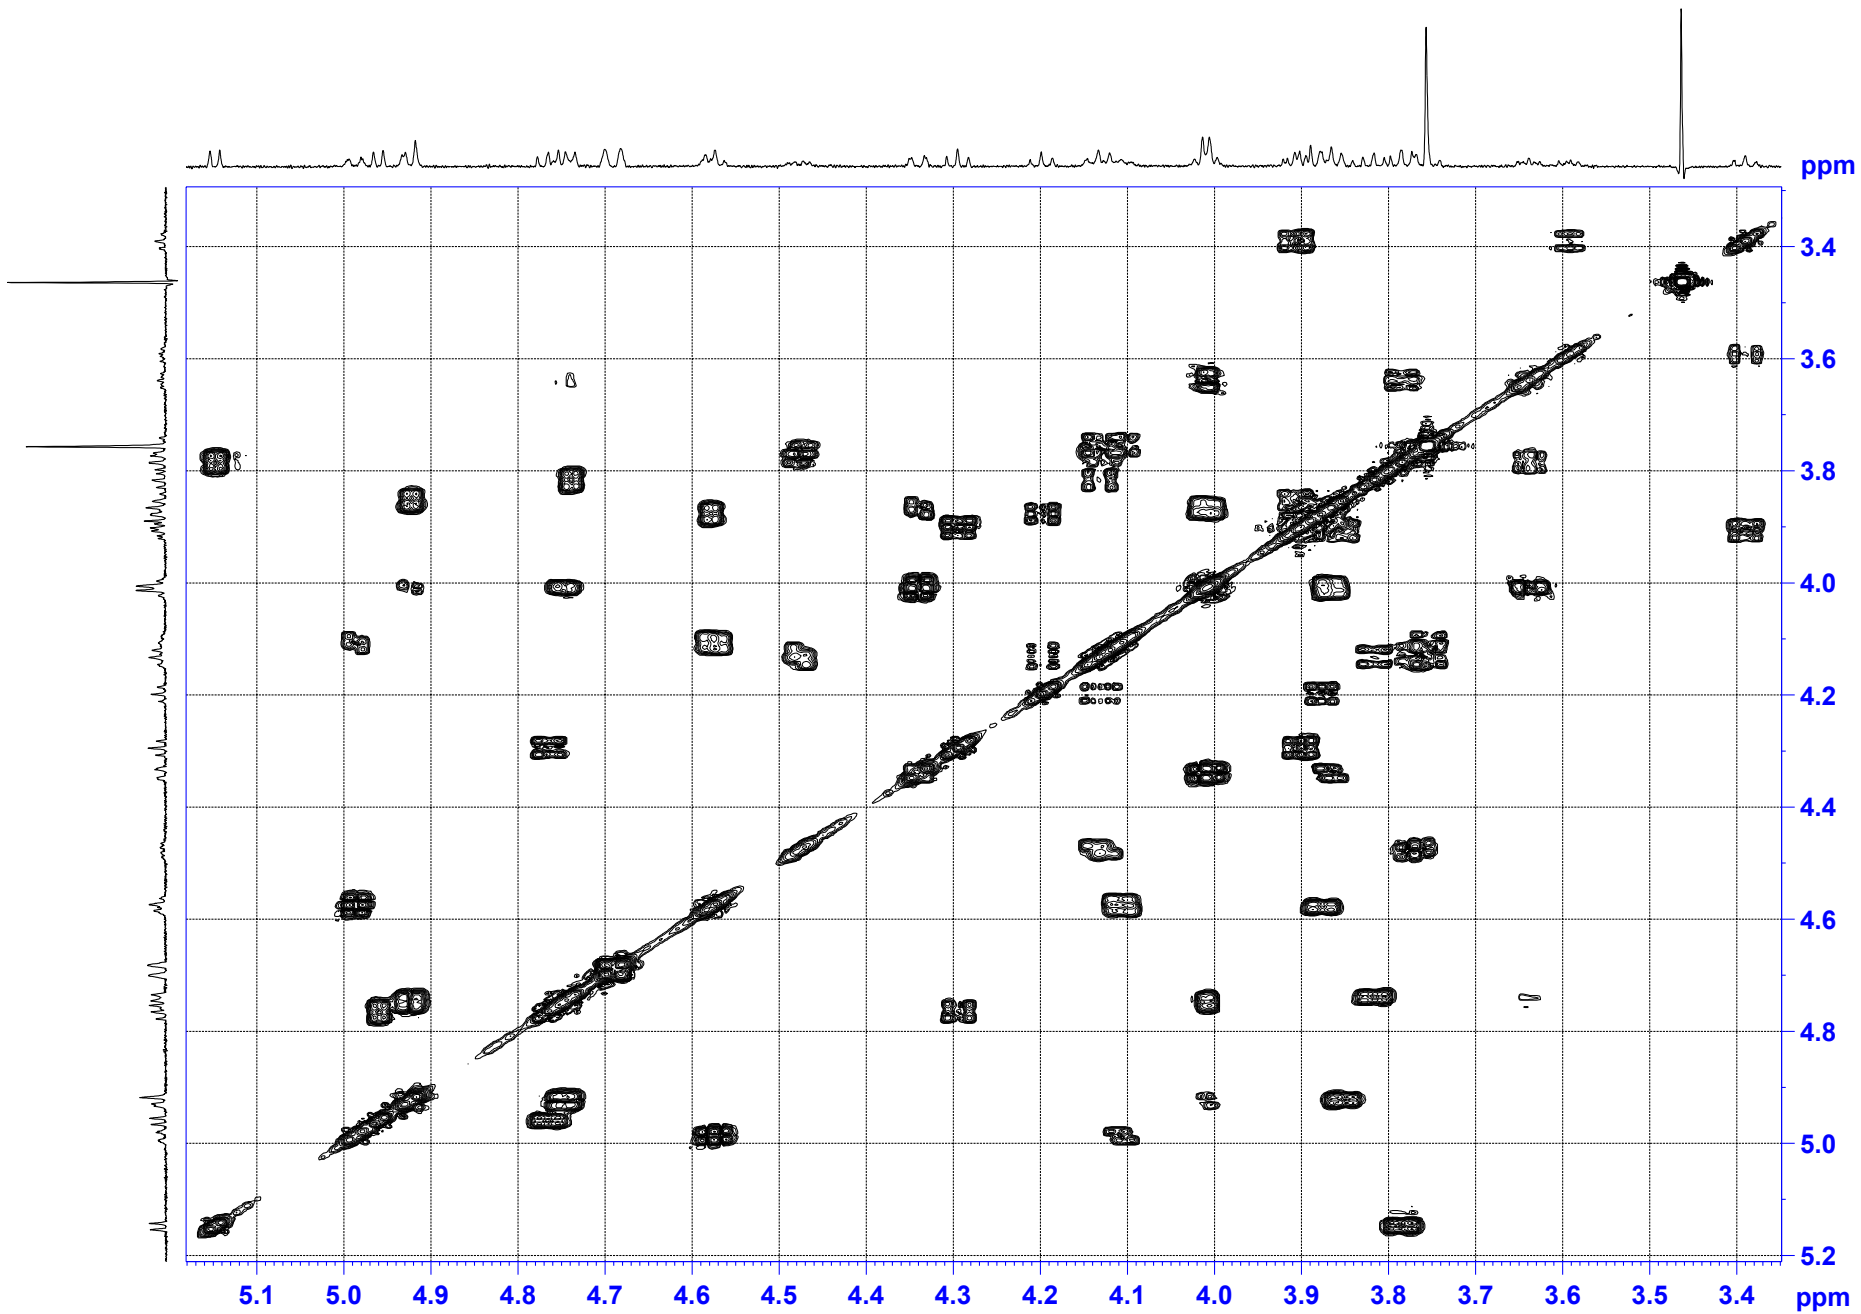

**Figure 29.** The COSY (700.13 MHz) spectrum of the carbohydrate moiety of **6** in C<sub>5</sub>D<sub>5</sub>N/D<sub>2</sub>O (4/1).

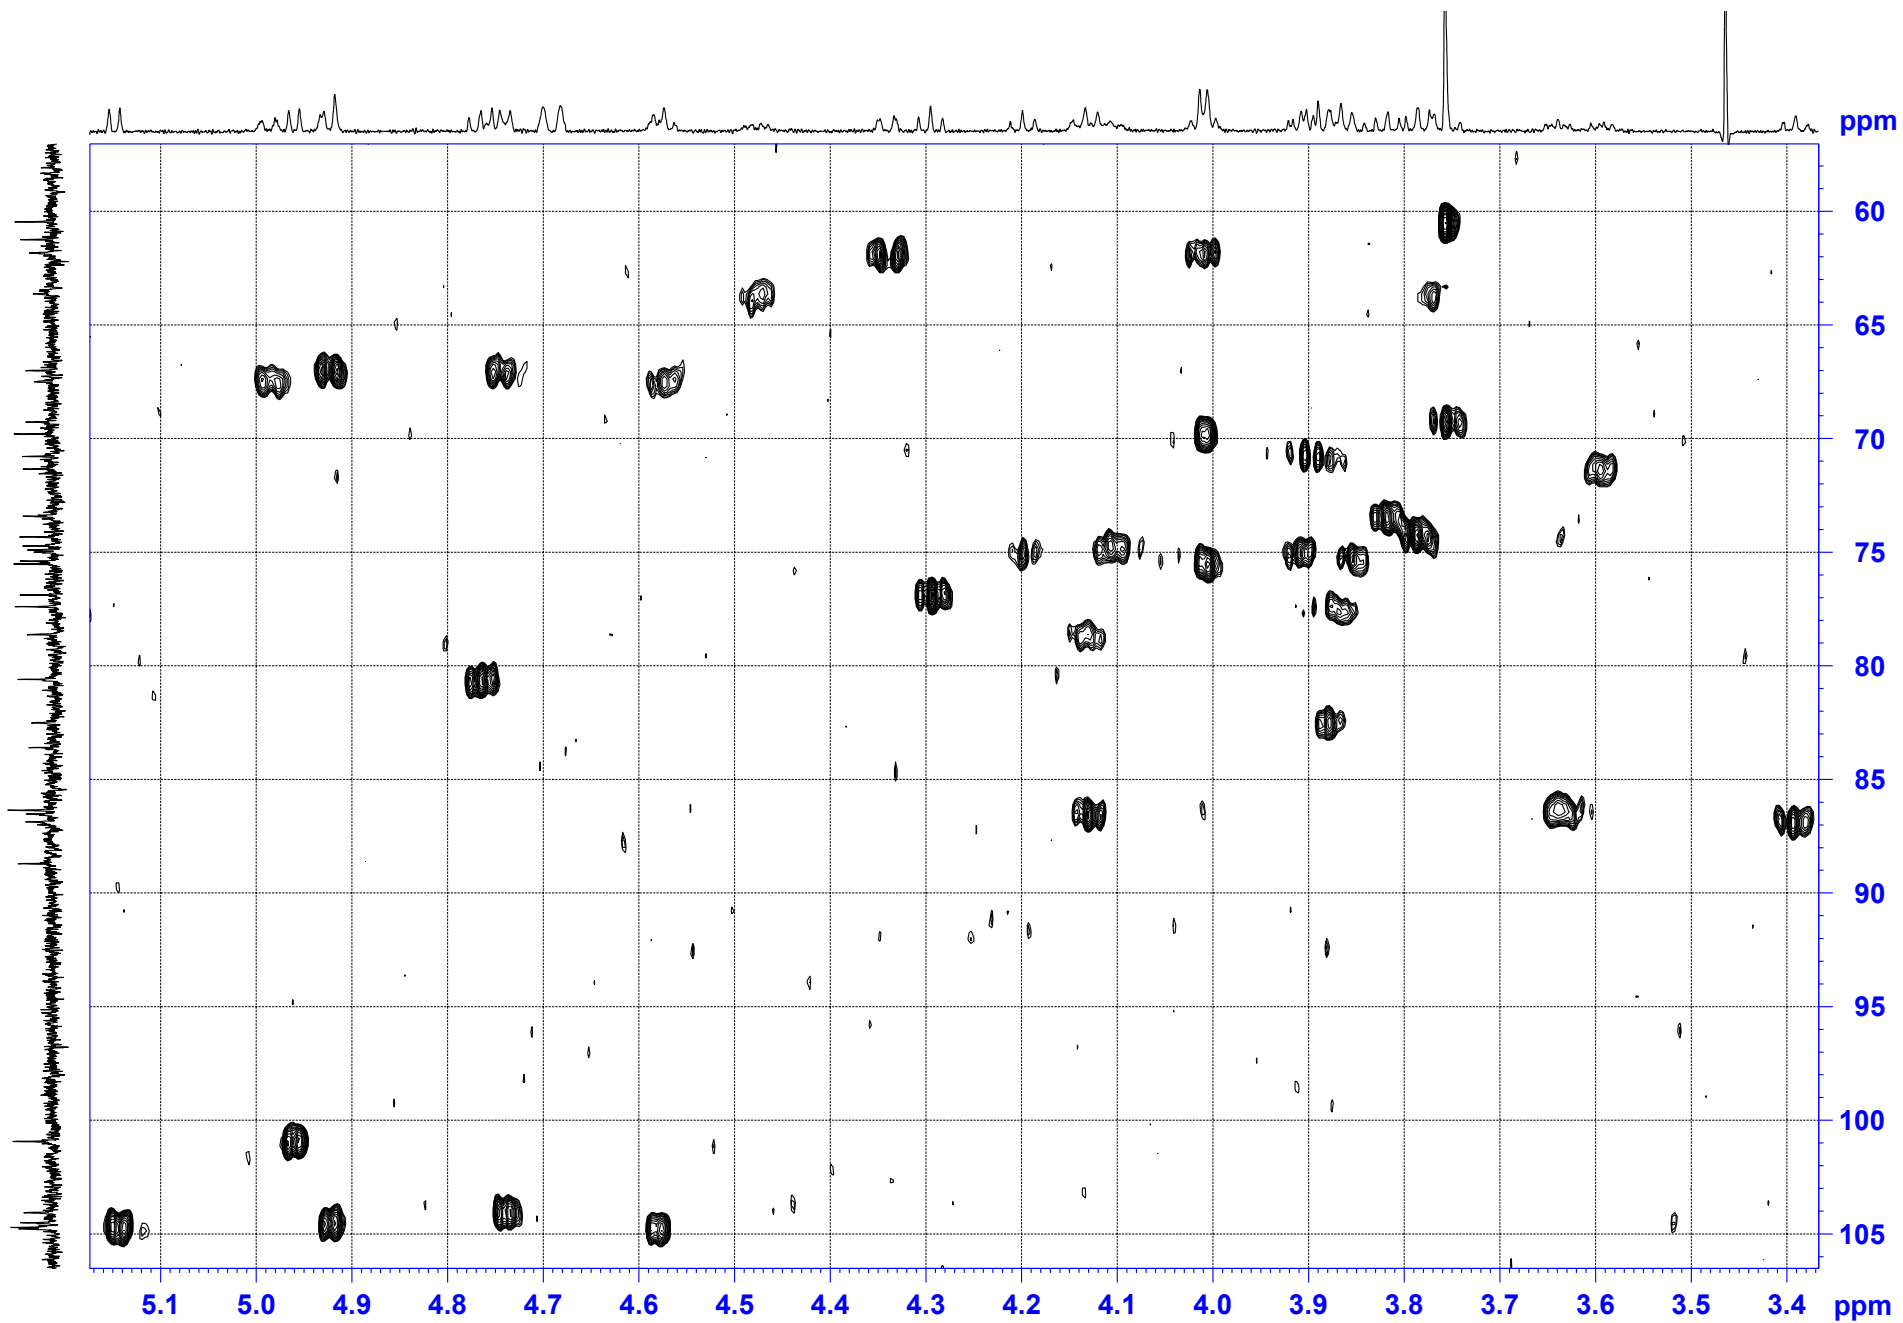

Figure 30. The HSQC (700.13 MHz) spectrum of the carbohydrate moiety of **6** in C<sub>5</sub>D<sub>5</sub>N/D<sub>2</sub>O (4/1).

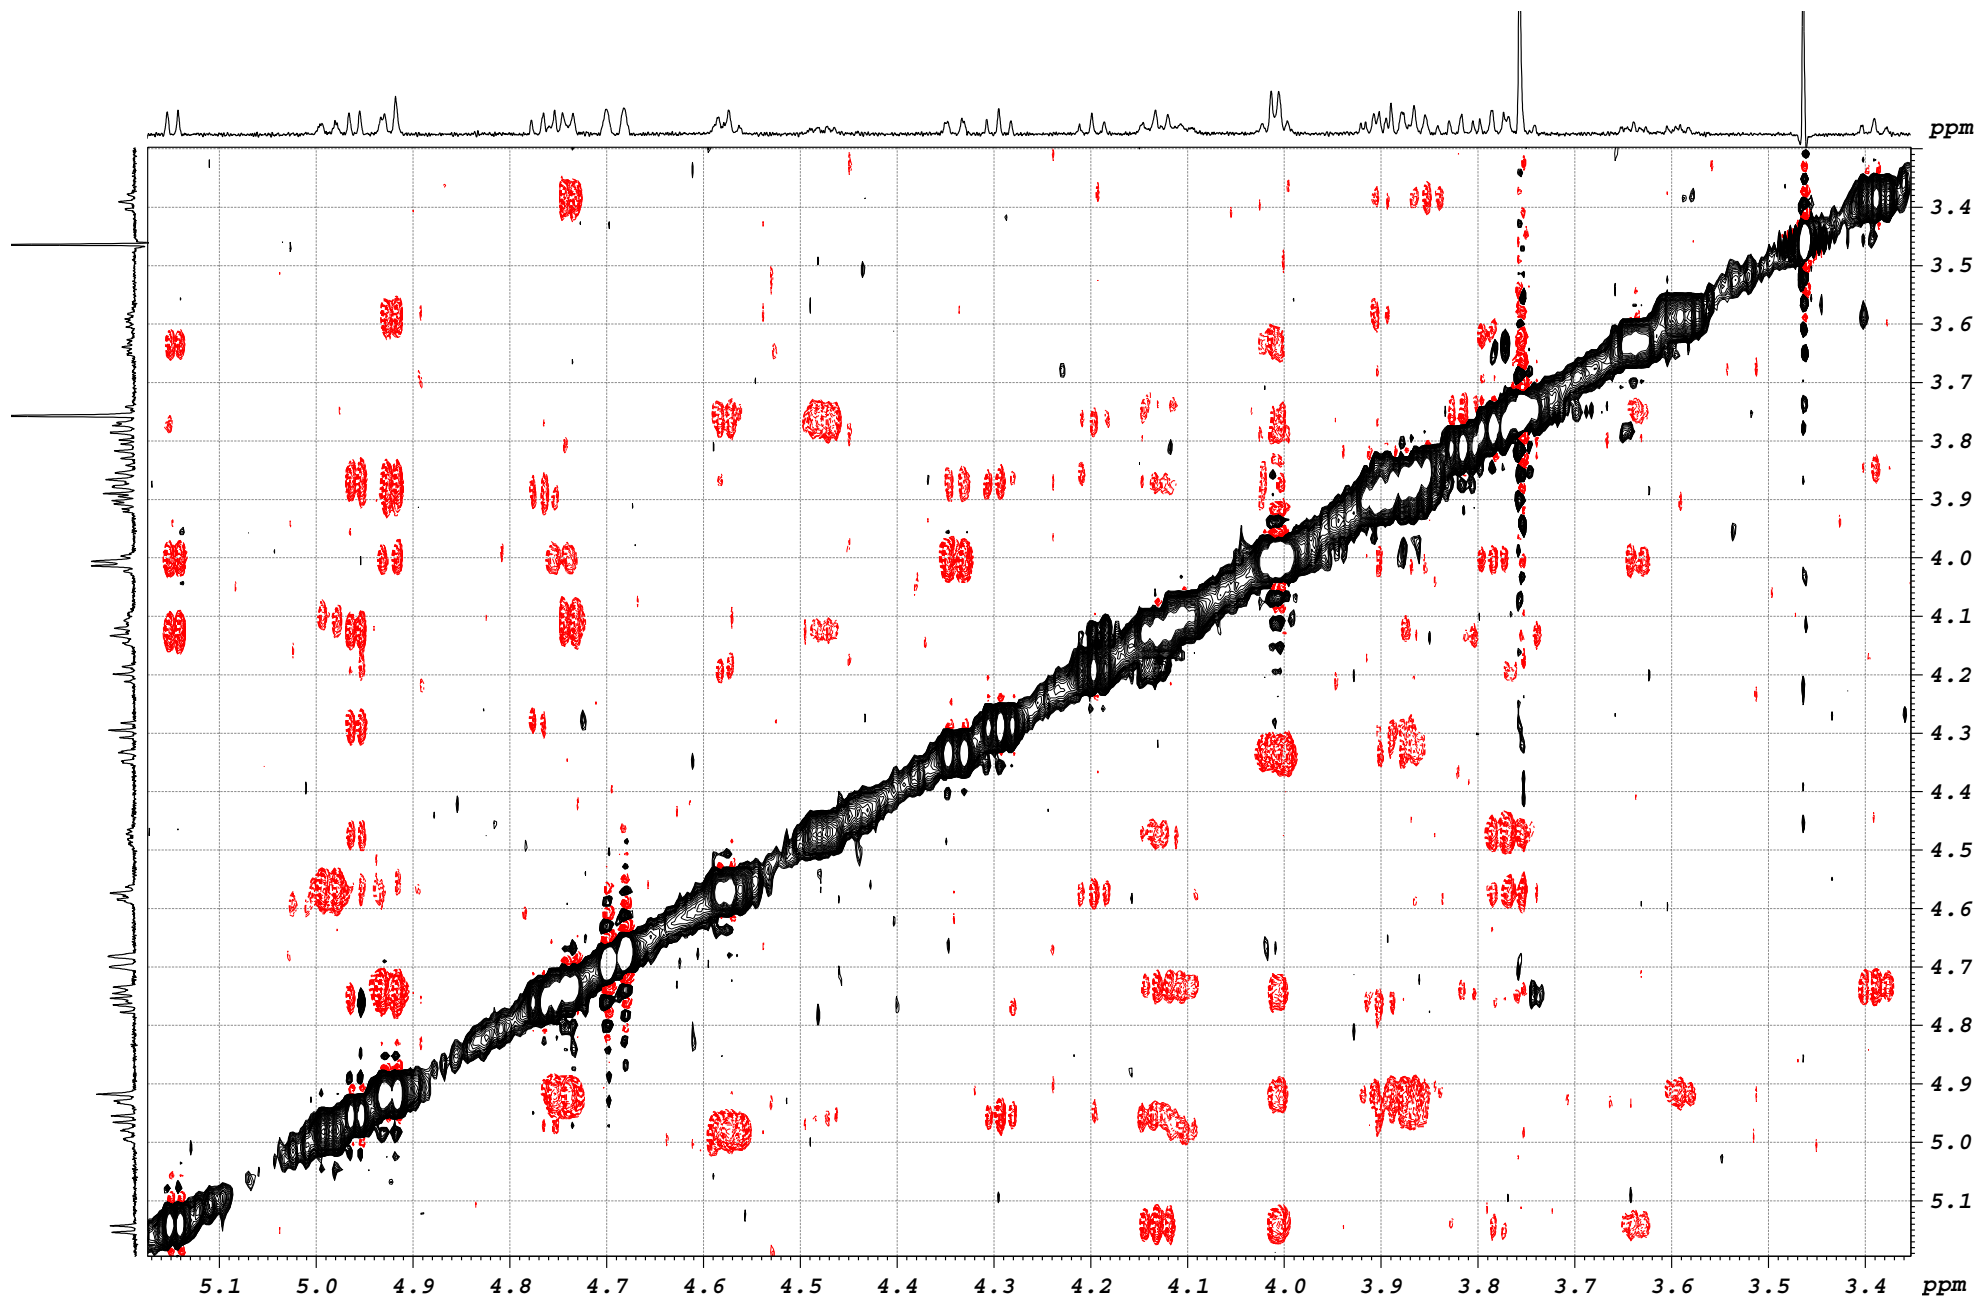

Figure 31. The ROESY (500.13 MHz) spectrum of the carbohydrate moiety of 6 in C<sub>5</sub>D<sub>5</sub>N/D<sub>2</sub>O (4/1).

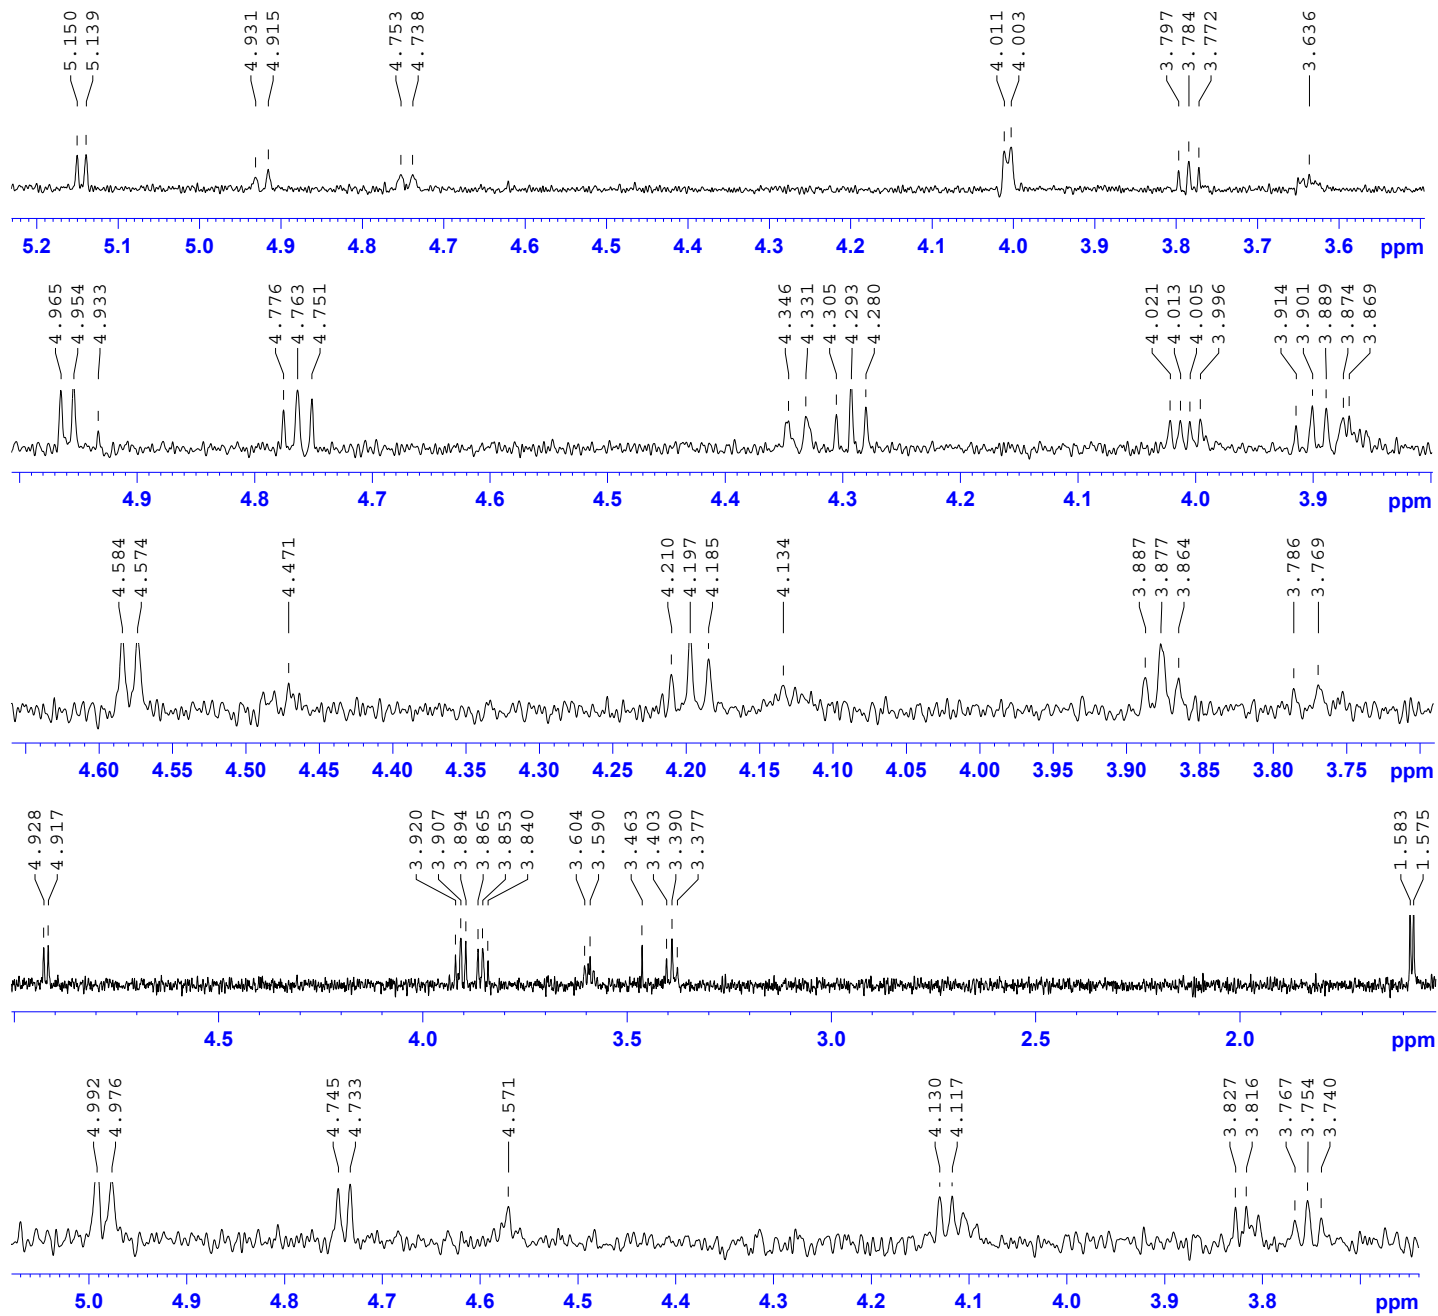

Figure 32. 1D TOCSY (700.13 MHz) spectra of the monosaccharide residues in 6 in  $C_5D_5N/D_2O$  (4/1).



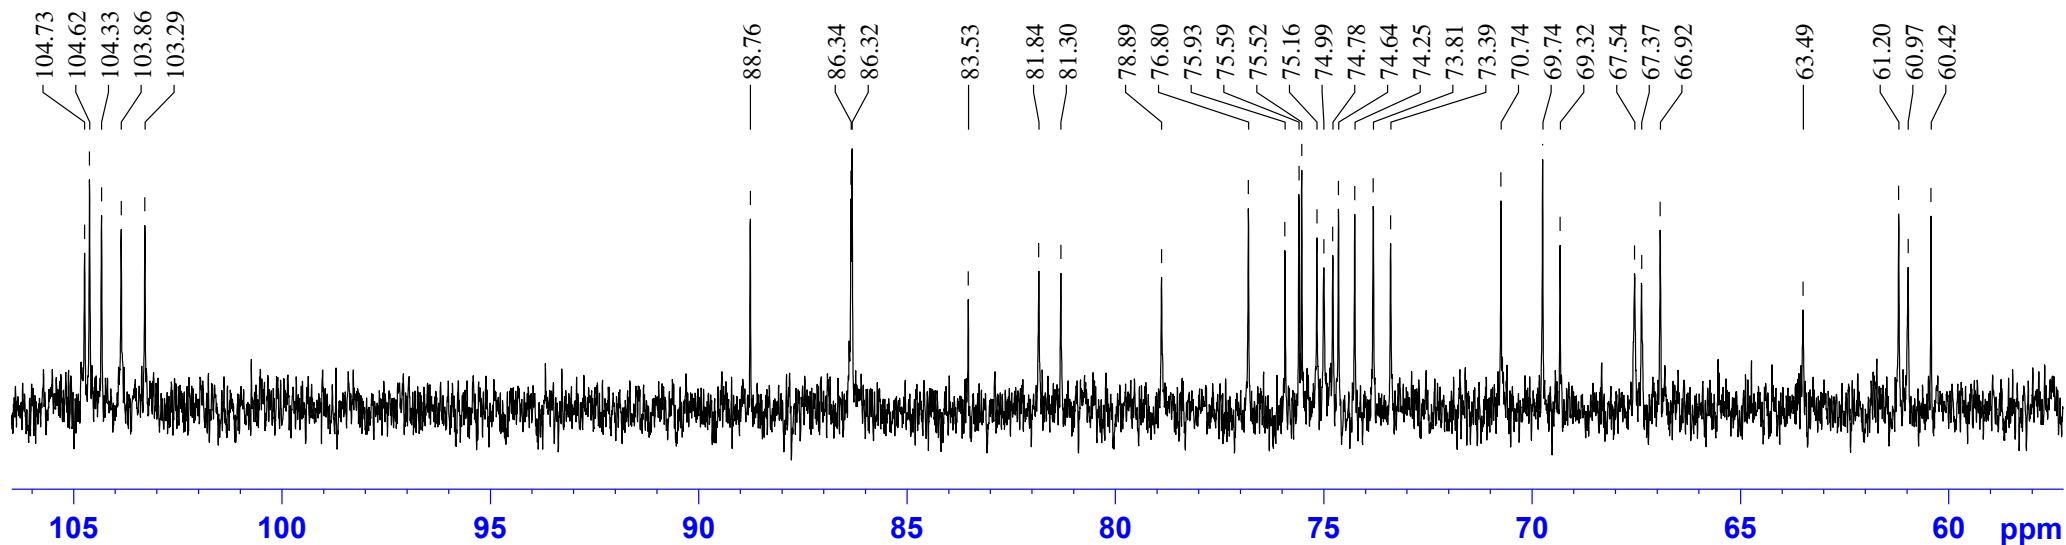

Figure 33. The  $^{13}\text{C}$  NMR (176.04 MHz) spectrum of the carbohydrate moiety of 7 in  $\text{C}_5\text{D}_5\text{N}/\text{D}_2\text{O}$  (4/1).

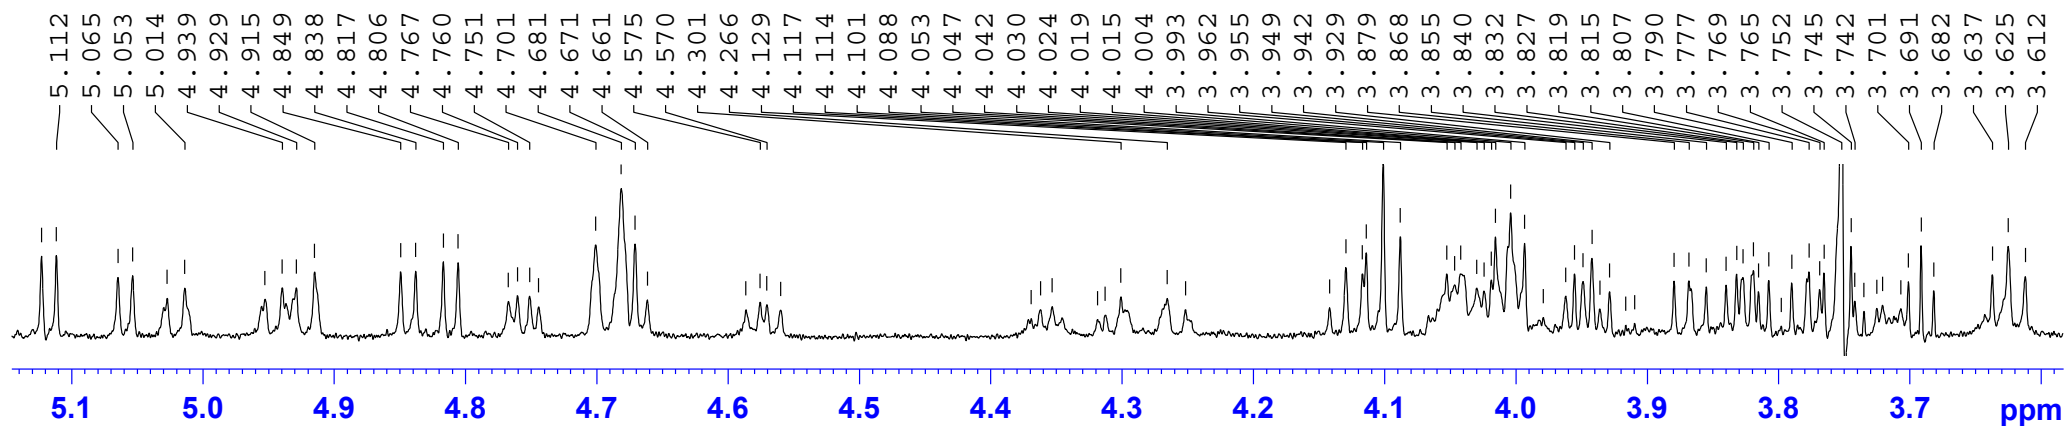

Figure 34. The  $^1\text{H}$  NMR (700.13 MHz) spectrum of the carbohydrate moiety of 7 in  $\text{C}_5\text{D}_5\text{N}/\text{D}_2\text{O}$  (4/1).

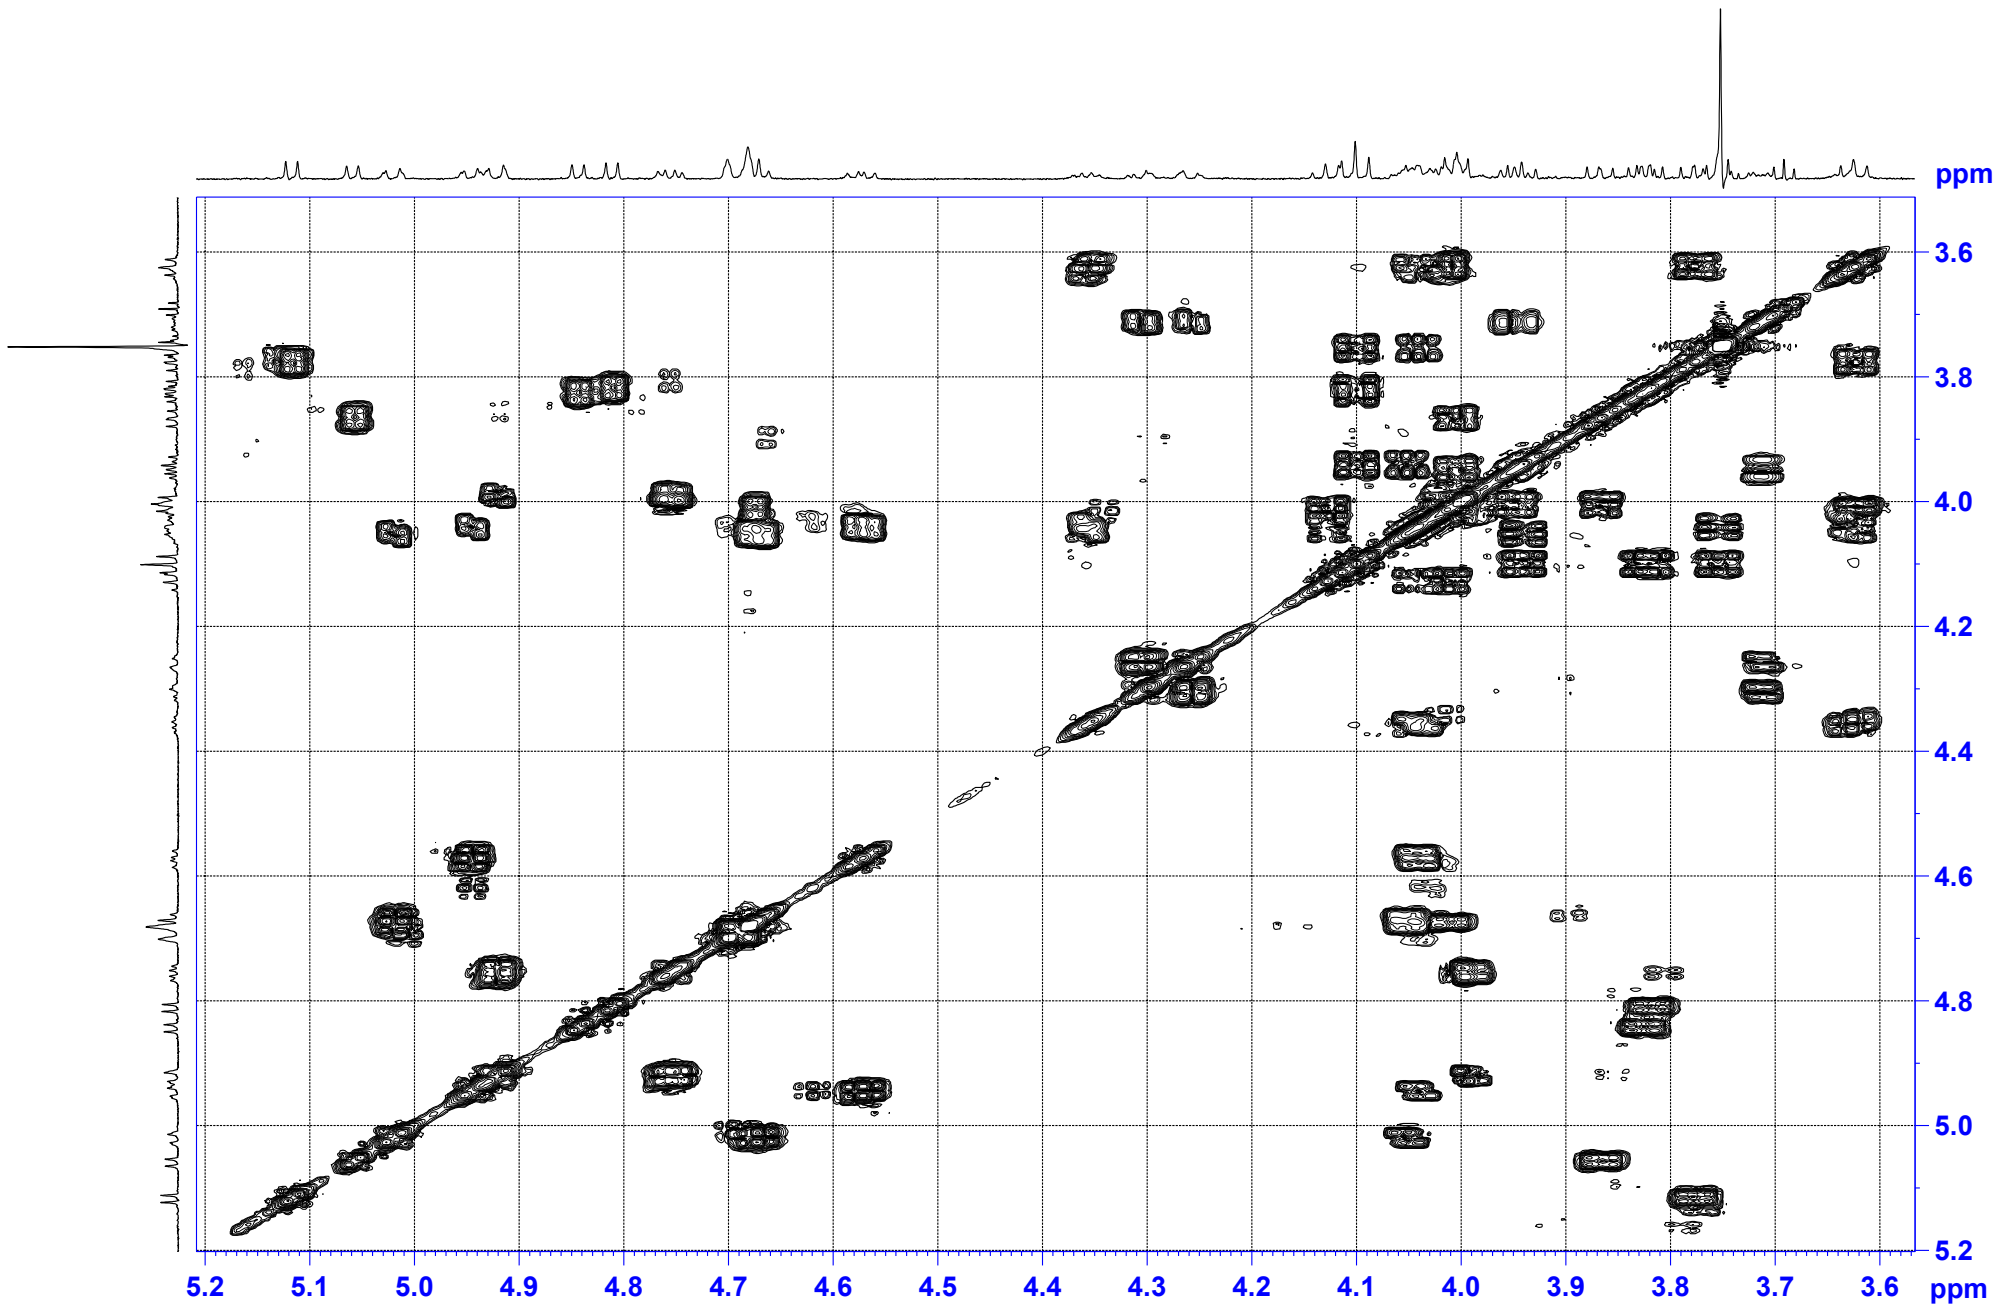

Figure 35. The COSY (700.13 MHz) spectrum of the carbohydrate moiety of **7** in  $C_5D_5N/D_2O$  (4/1).

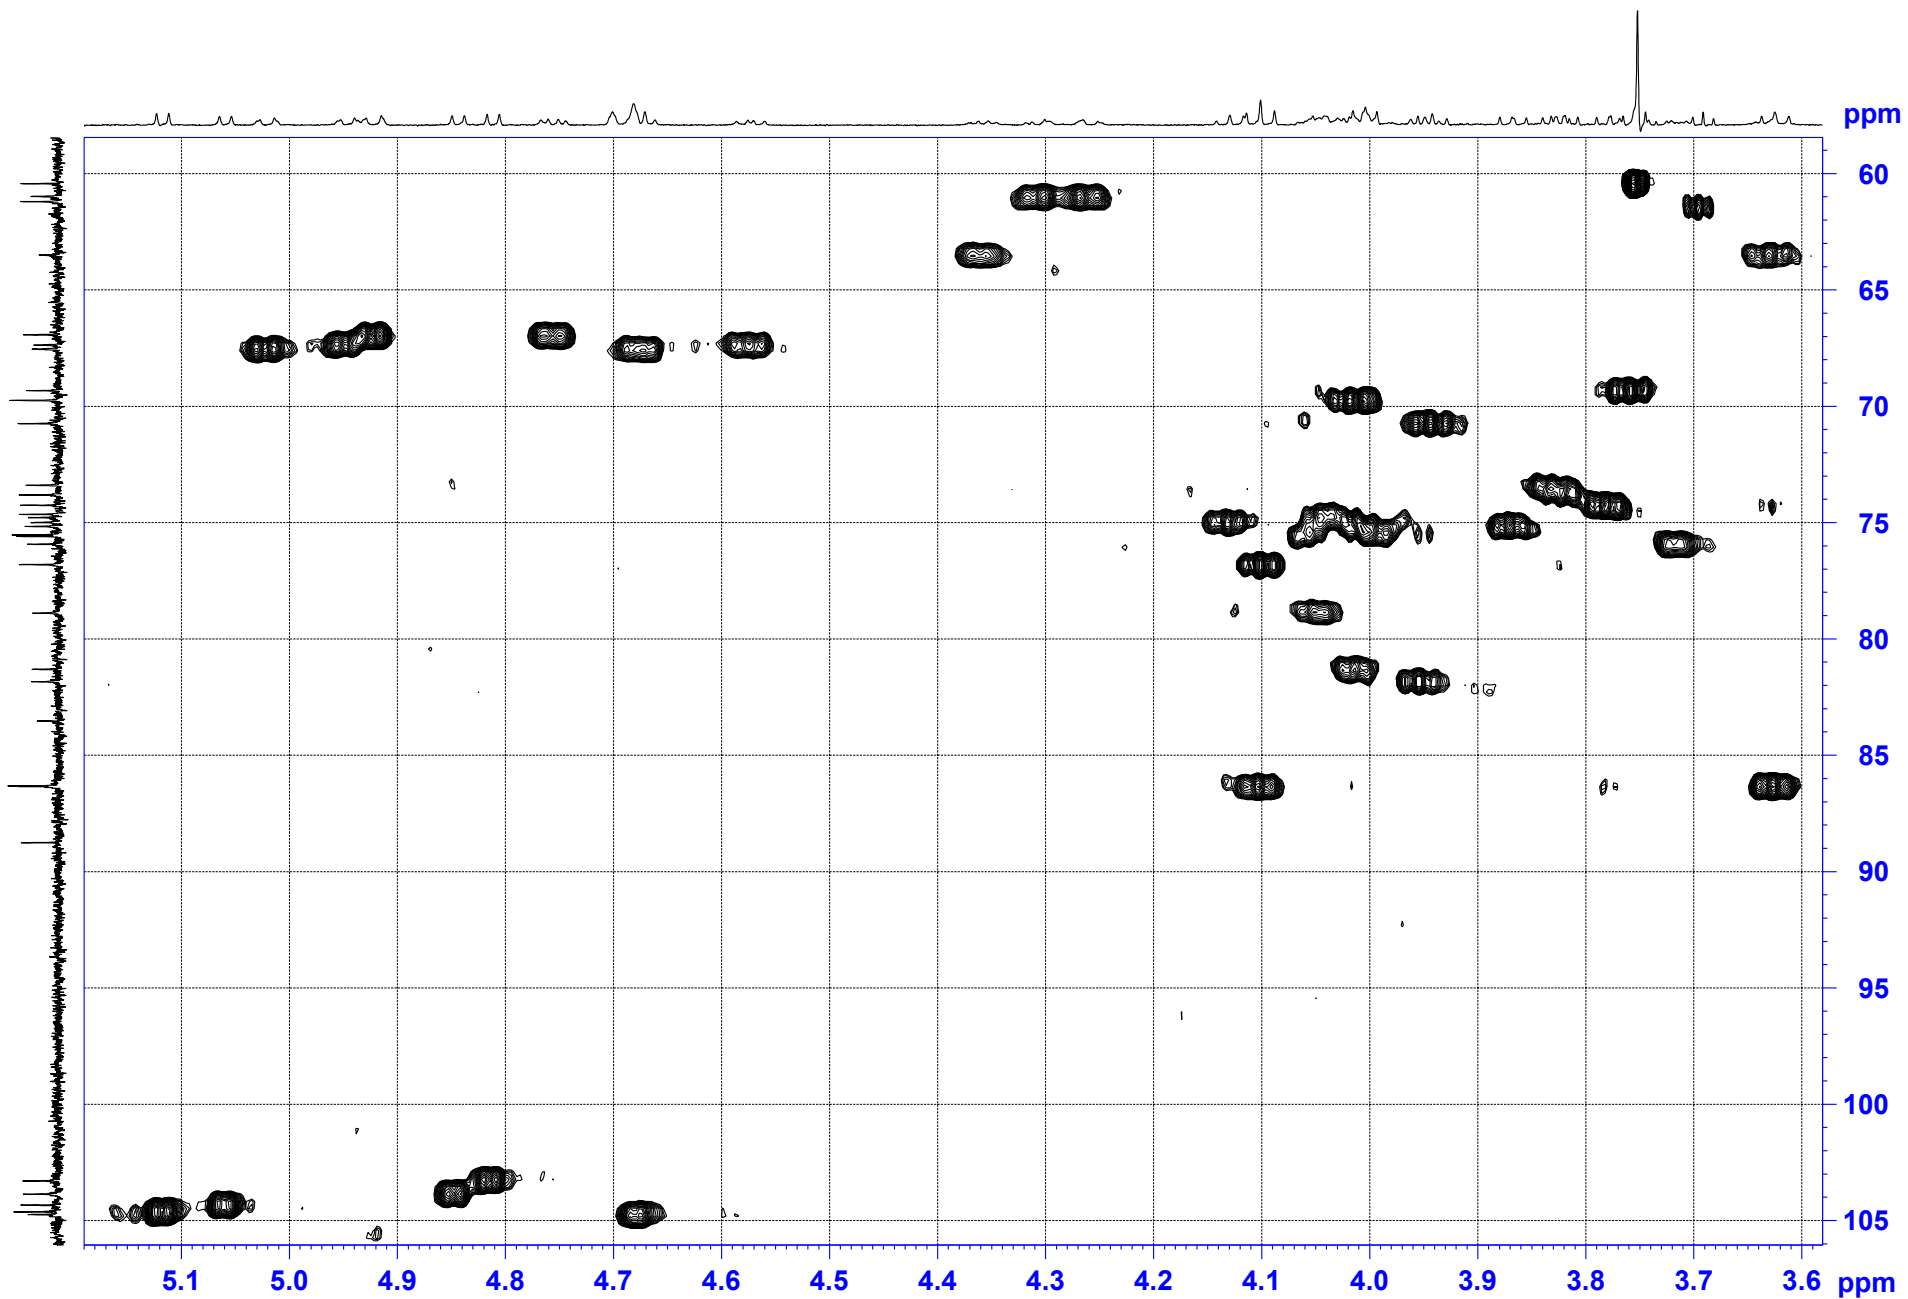

Figure 36. The HSQC (700.13 MHz) spectrum of the carbohydrate moiety of 7 in  $\text{C}_5\text{D}_5\text{N}/\text{D}_2\text{O}$  (4/1).

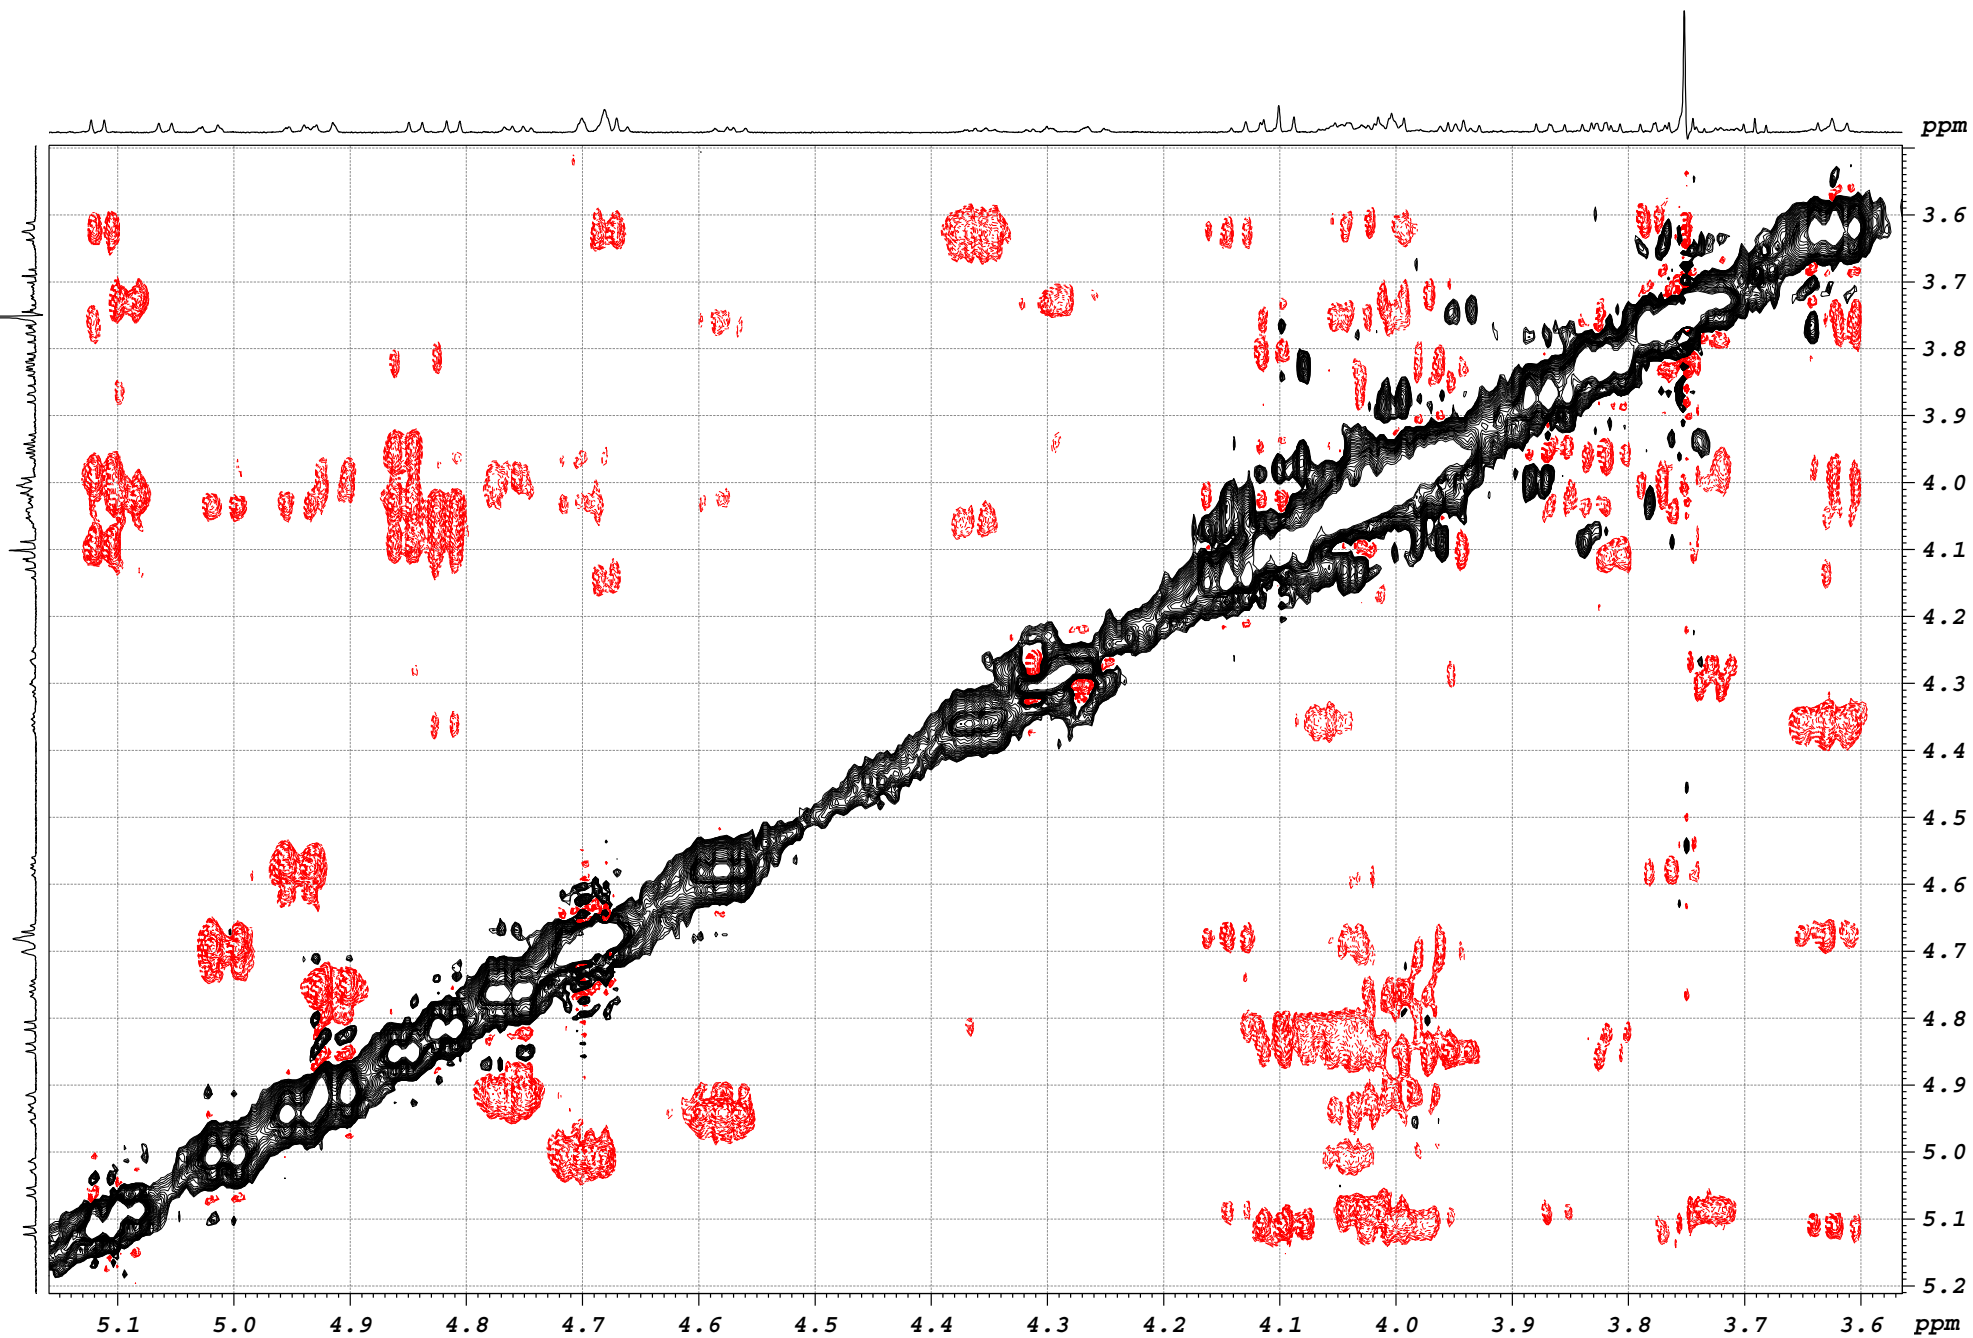

Figure 37. The ROESY (500.13 MHz) spectrum of the carbohydrate moiety of 7 in C<sub>5</sub>D<sub>5</sub>N/D<sub>2</sub>O (4/1).

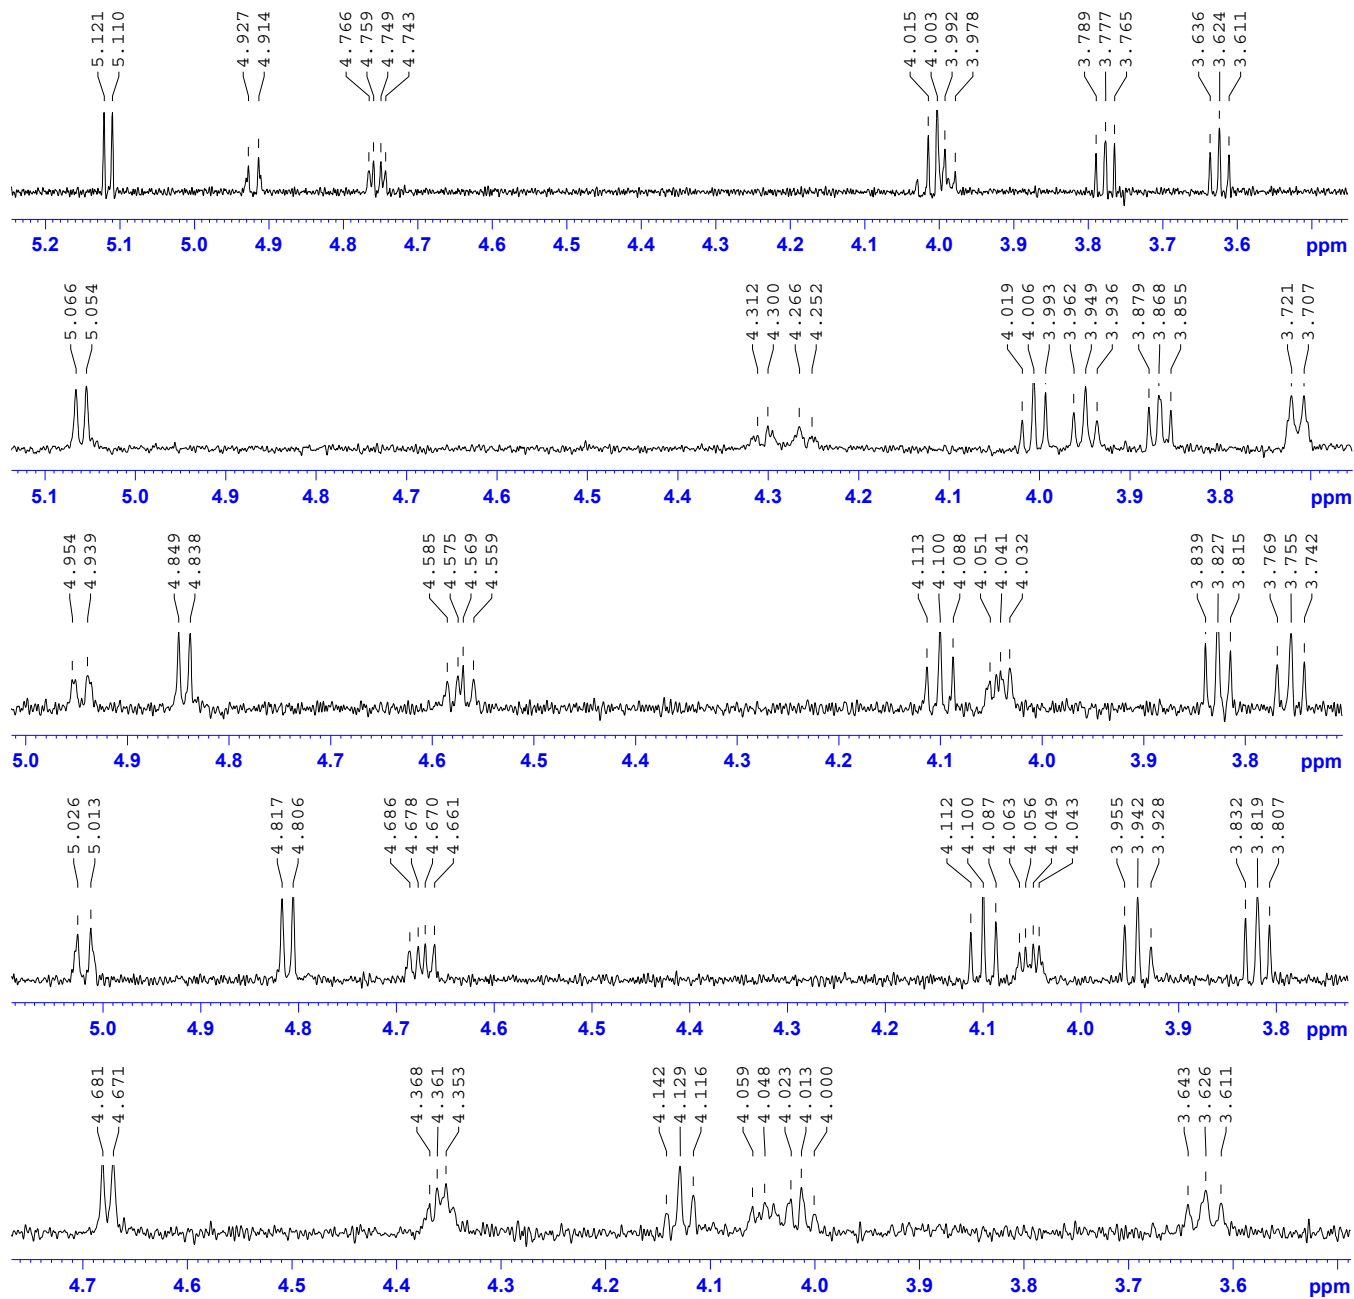

Figure 38. 1D TOCSY (700.13 MHz) spectra of the monosaccharide residues in **7** in  $C_5D_5N/D_2O$  (4/1).

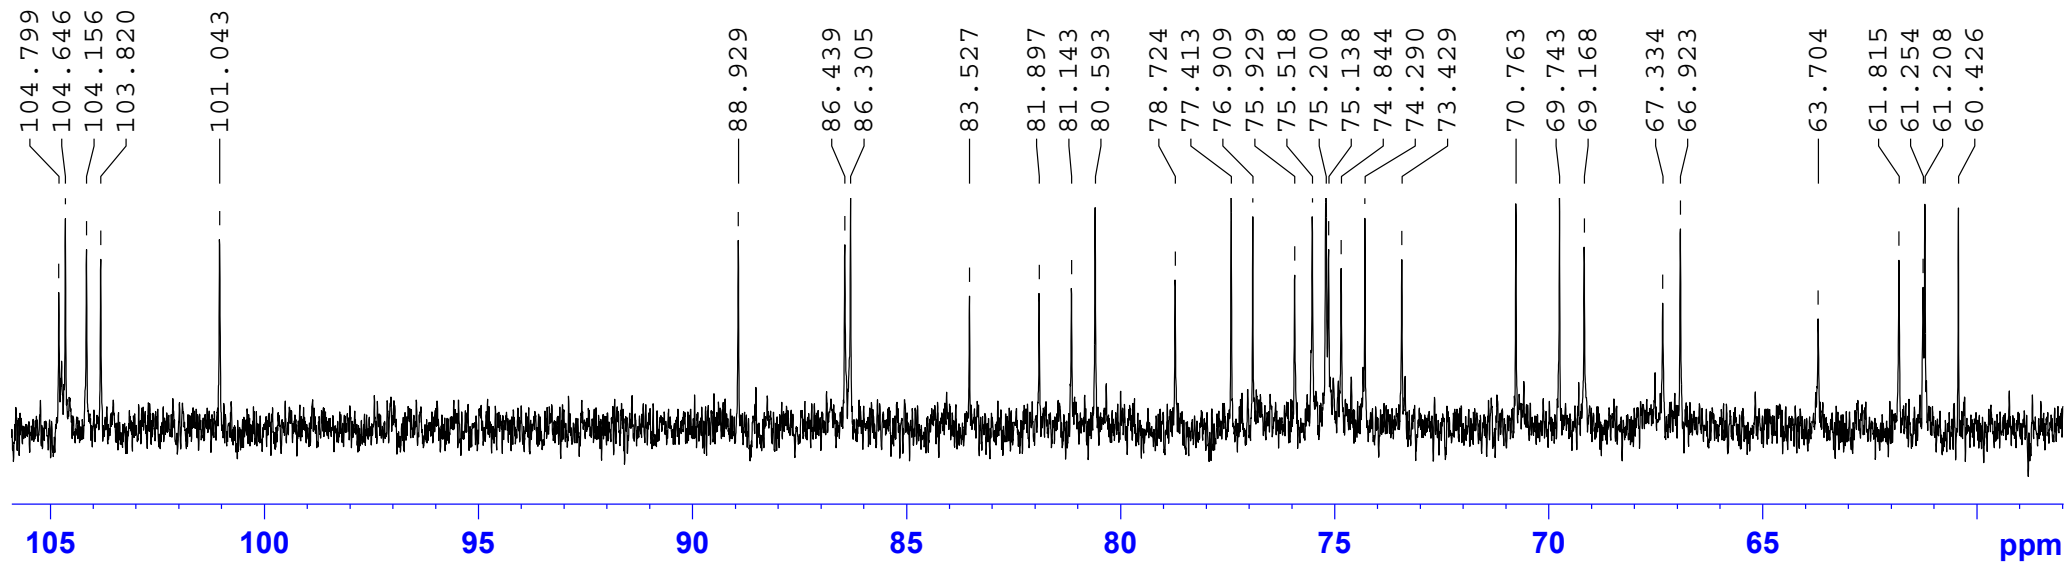

Figure 39. The  $^{13}\text{C}$  NMR (176.04 MHz) spectrum of the carbohydrate moiety of **8** in  $\text{C}_5\text{D}_5\text{N}/\text{D}_2\text{O}$  (4/1).

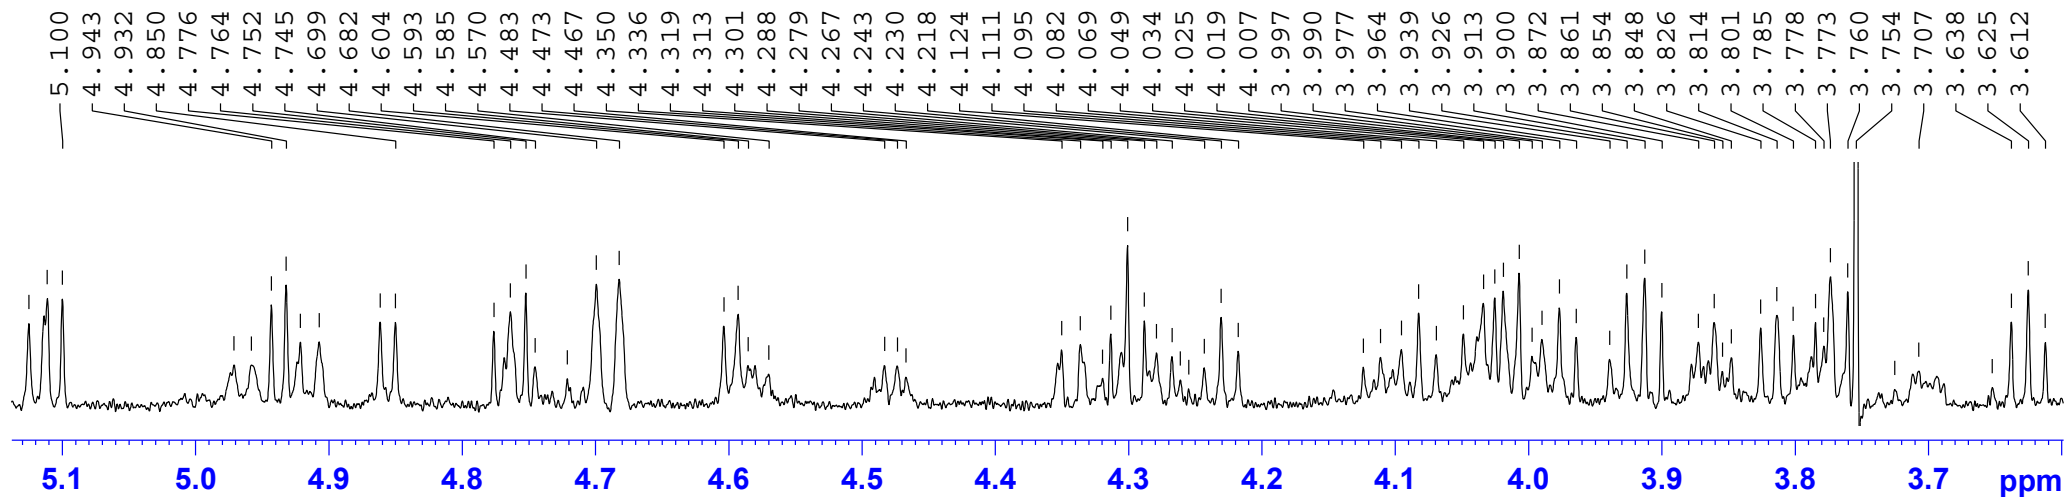

Figure 40. The  $^1\text{H}$  NMR (700.13 MHz) spectrum of the carbohydrate moiety of **8** in  $\text{C}_5\text{D}_5\text{N}/\text{D}_2\text{O}$  (4/1).

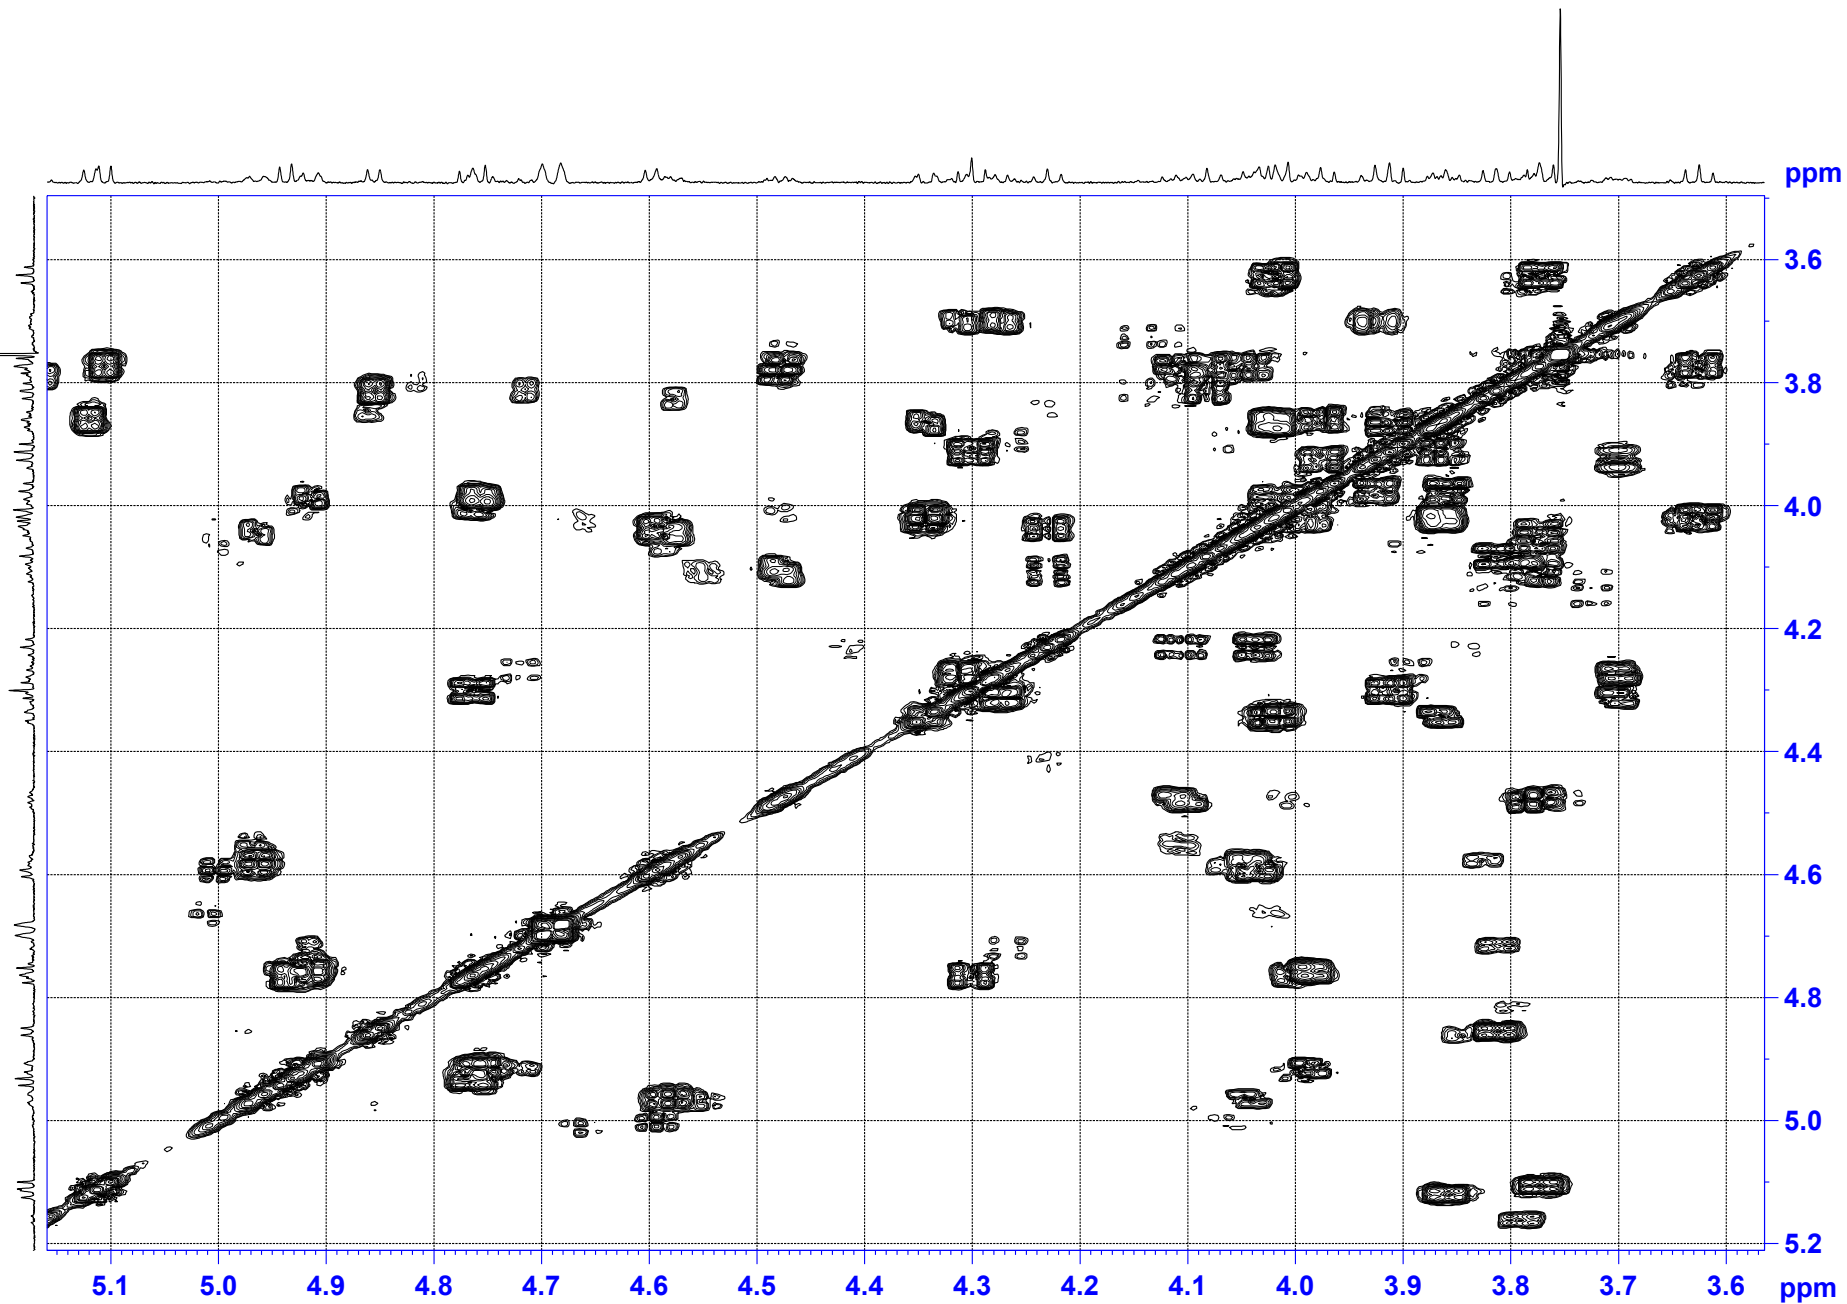

Figure 41. The COSY (700.13 MHz) spectrum of the carbohydrate moiety of **8** in  $C_5D_5N/D_2O$  (4/1).



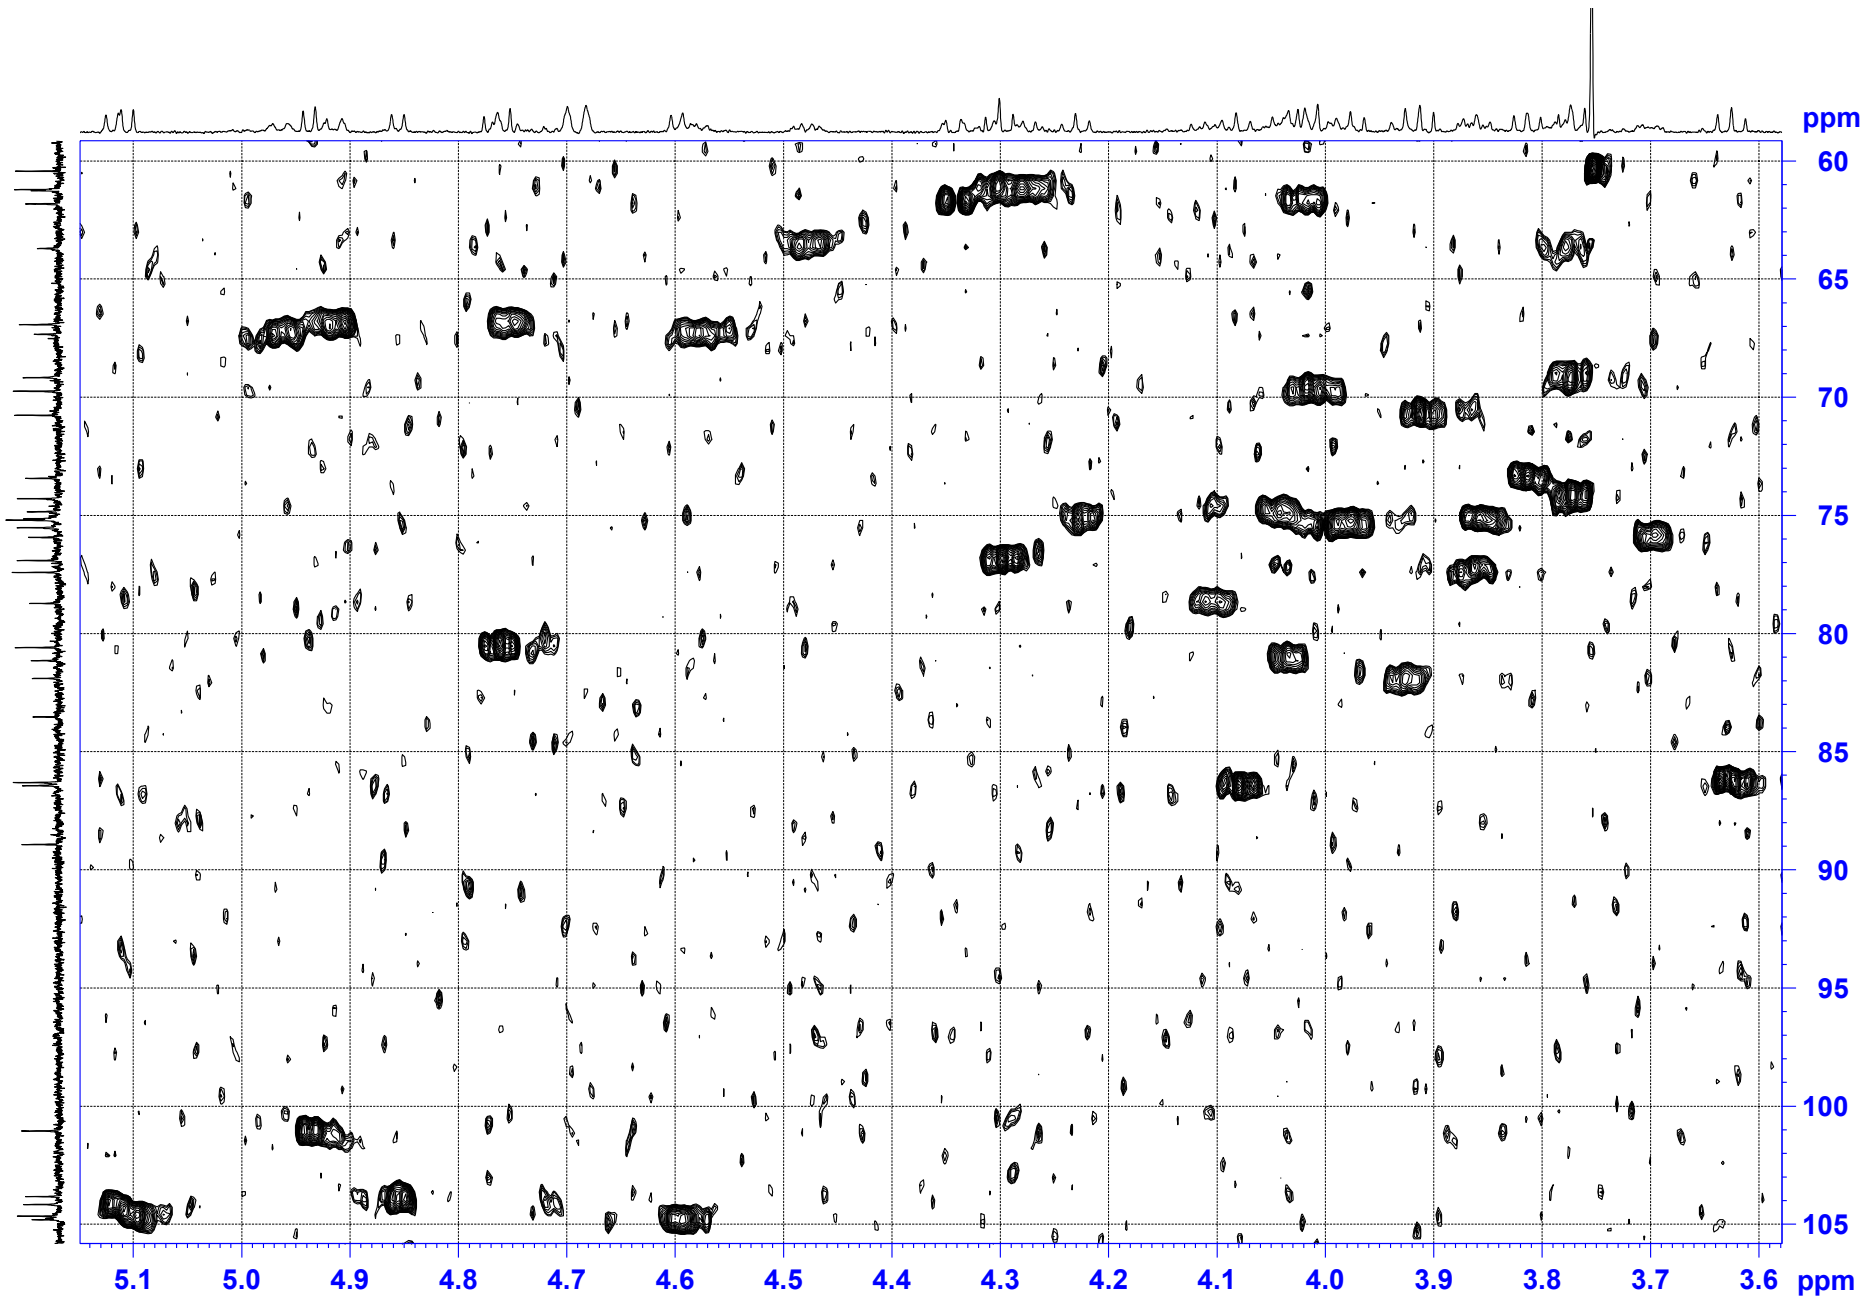

Figure 42. The HSQC (700.13 MHz) spectrum of the carbohydrate moiety of **8** in  $\text{C}_5\text{D}_5\text{N}/\text{D}_2\text{O}$  (4/1).



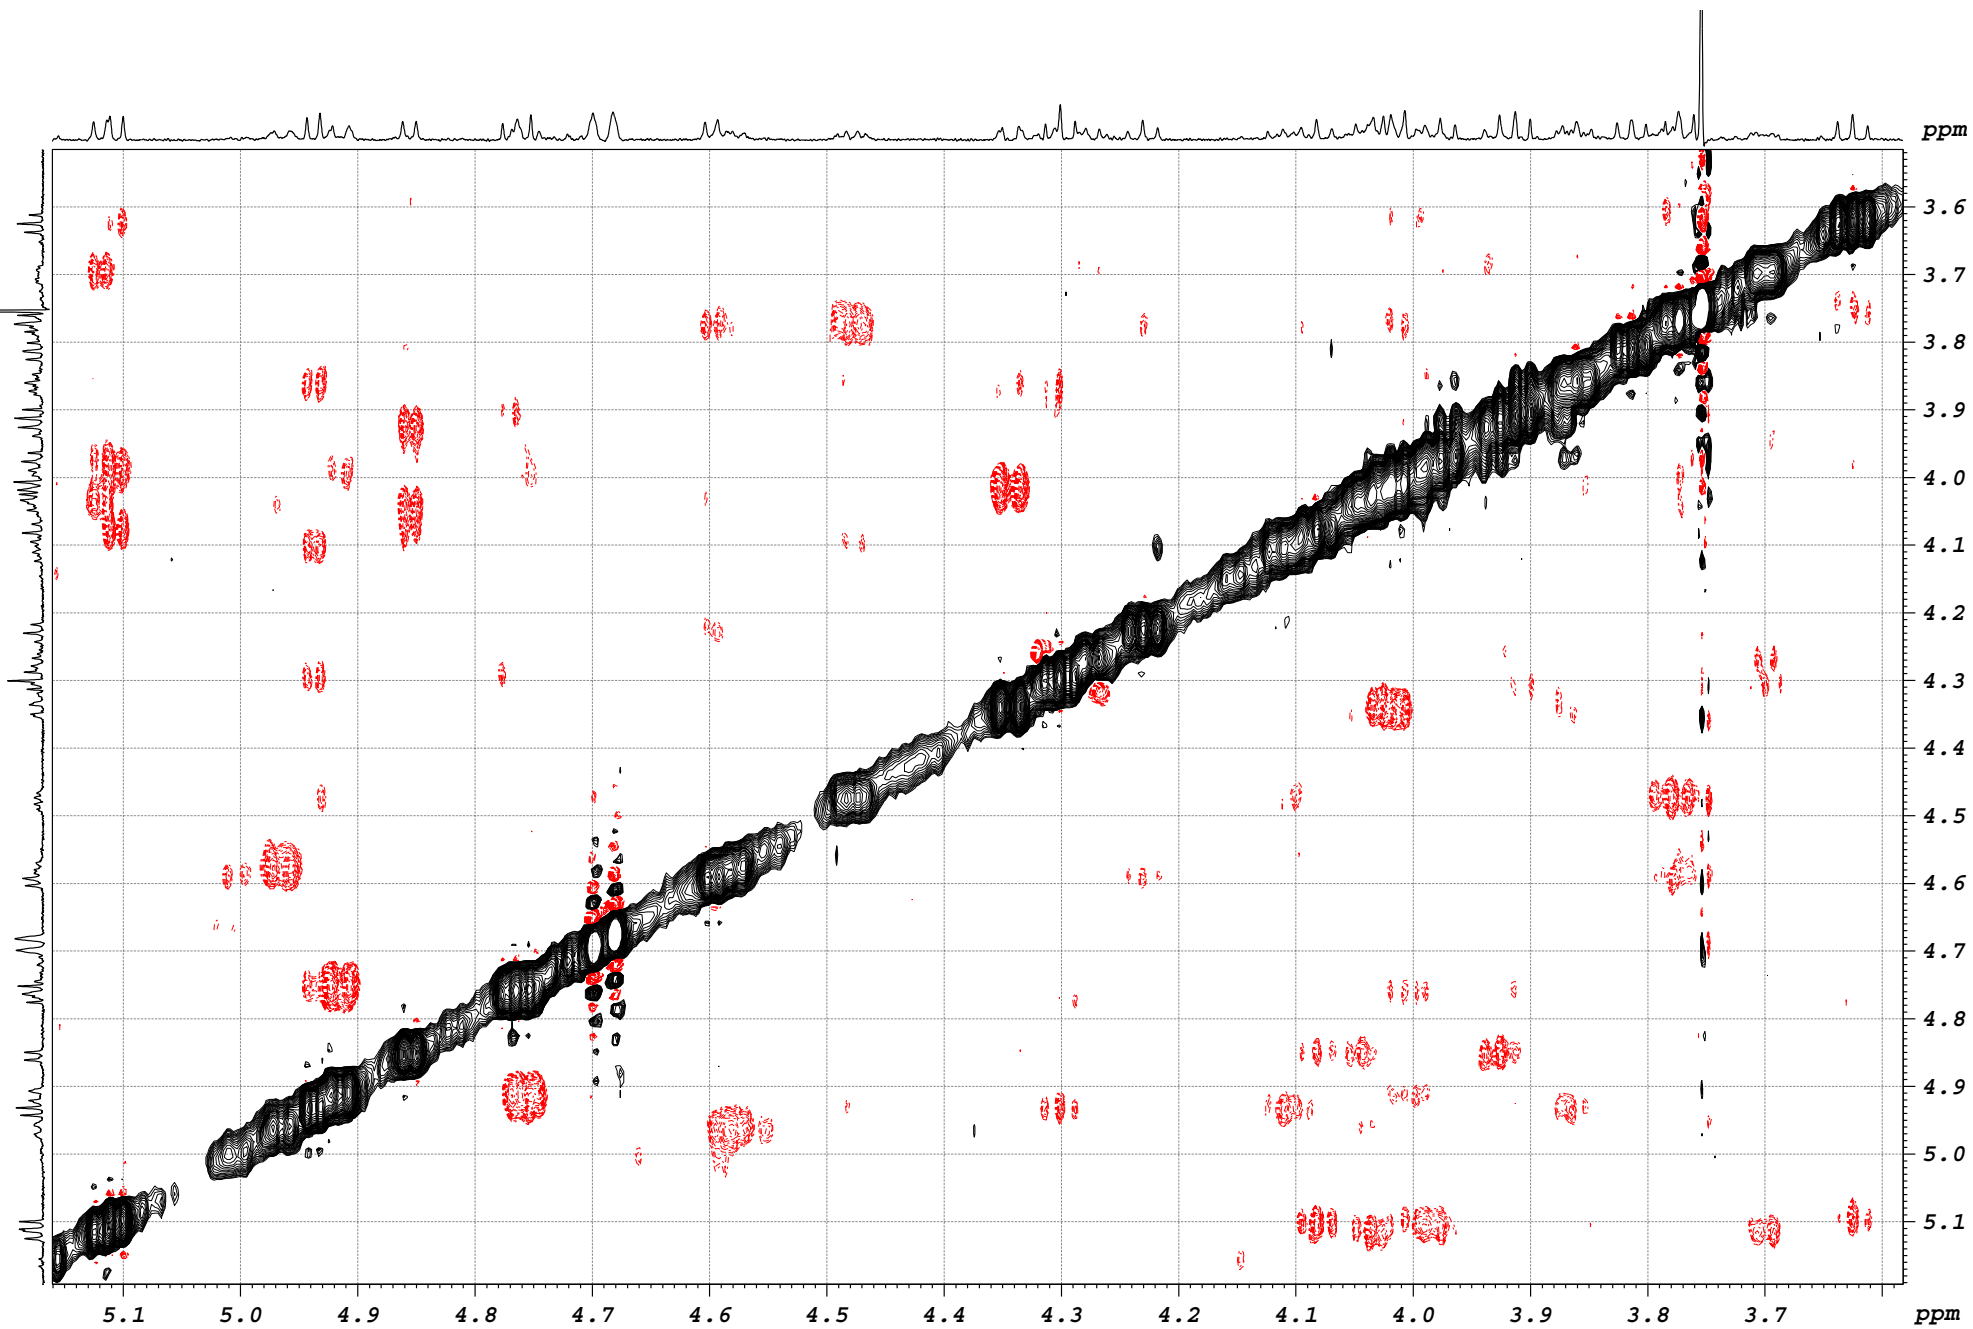

Figure 43. The ROESY (500.13 MHz) spectrum of the carbohydrate moiety of 8 in C<sub>5</sub>D<sub>5</sub>N/D<sub>2</sub>O (4/1).

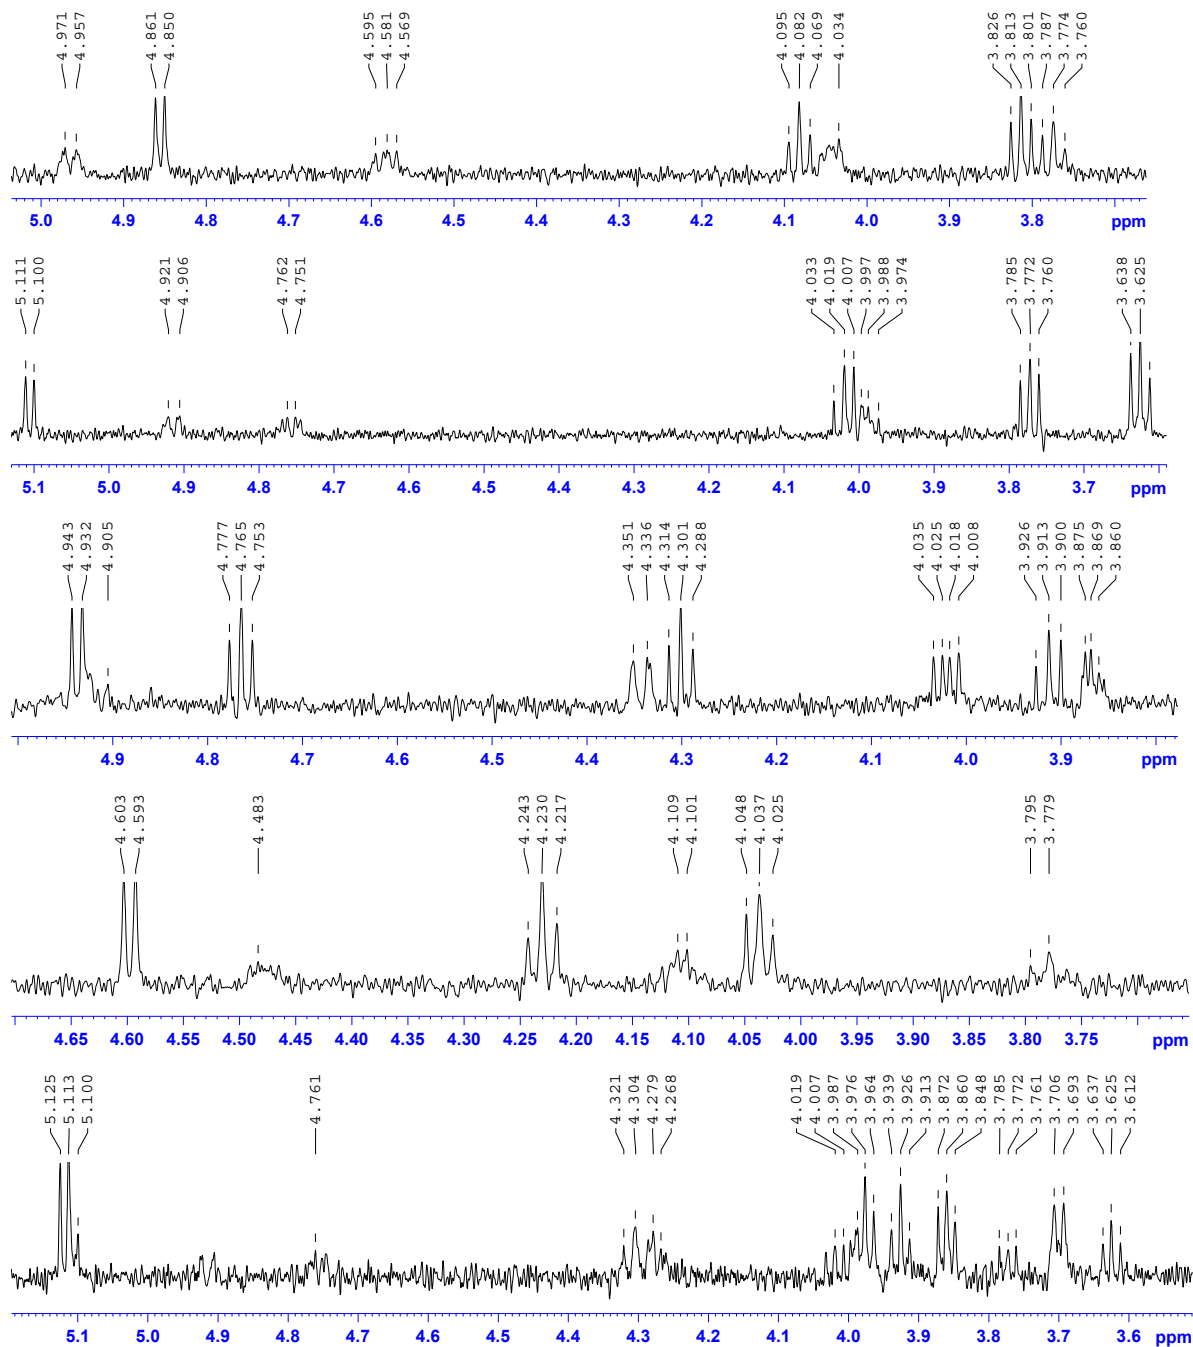

**Figure 44.** 1D TOCSY (700.13 MHz) spectra of the monosaccharide residues in **8** in  $C_5D_5N/D_2O$  (4/1).

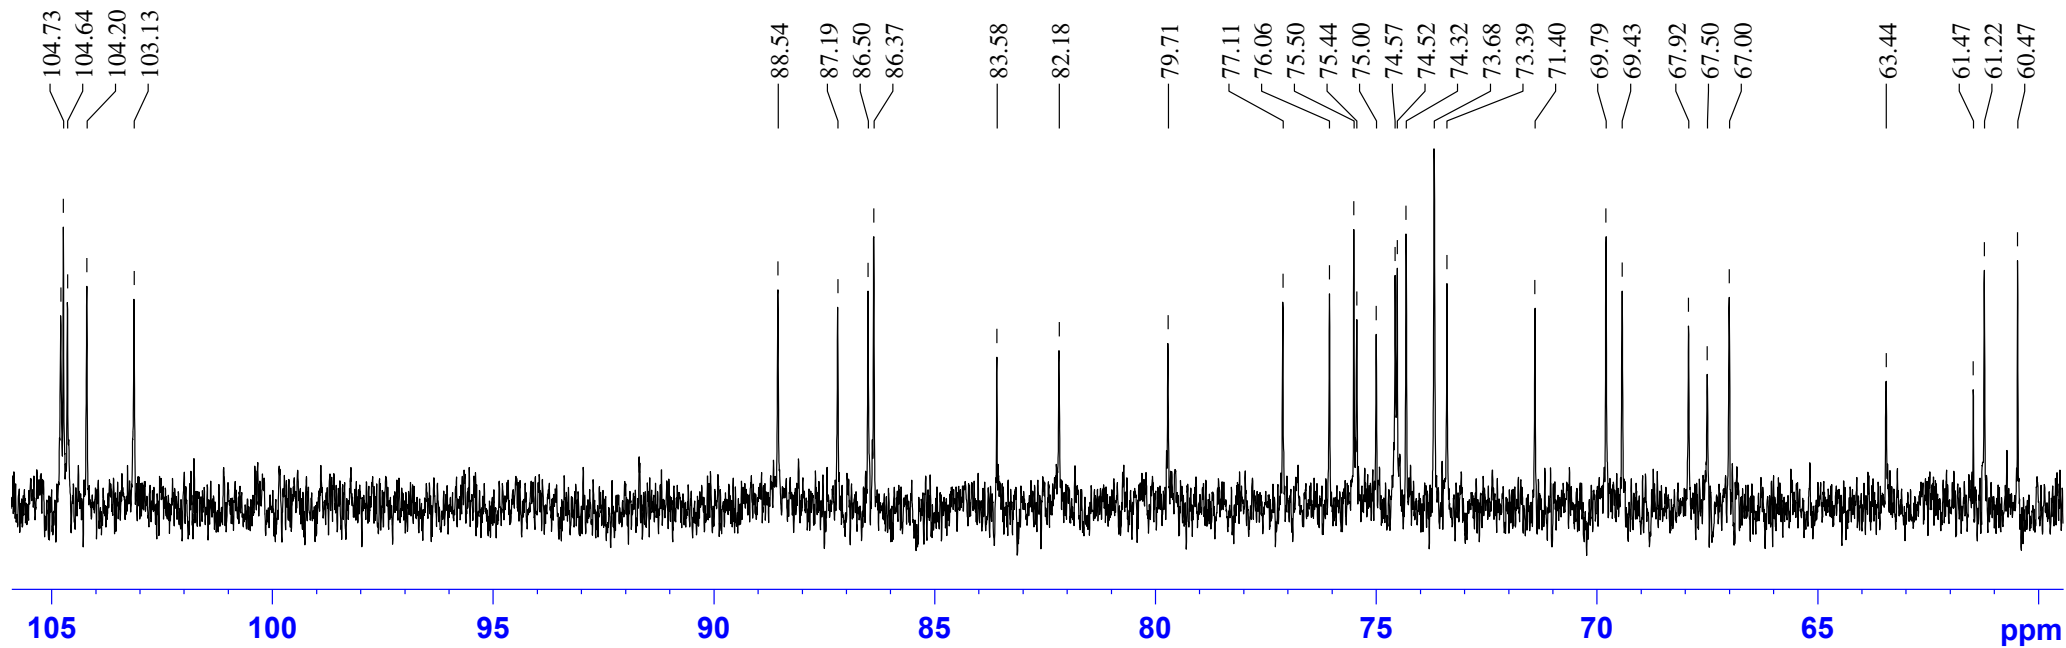

Figure 45. The  $^{13}\text{C}$  NMR (176.04 MHz) spectrum of the carbohydrate moiety of **9** in  $\text{C}_5\text{D}_5\text{N}/\text{D}_2\text{O}$  (4/1).

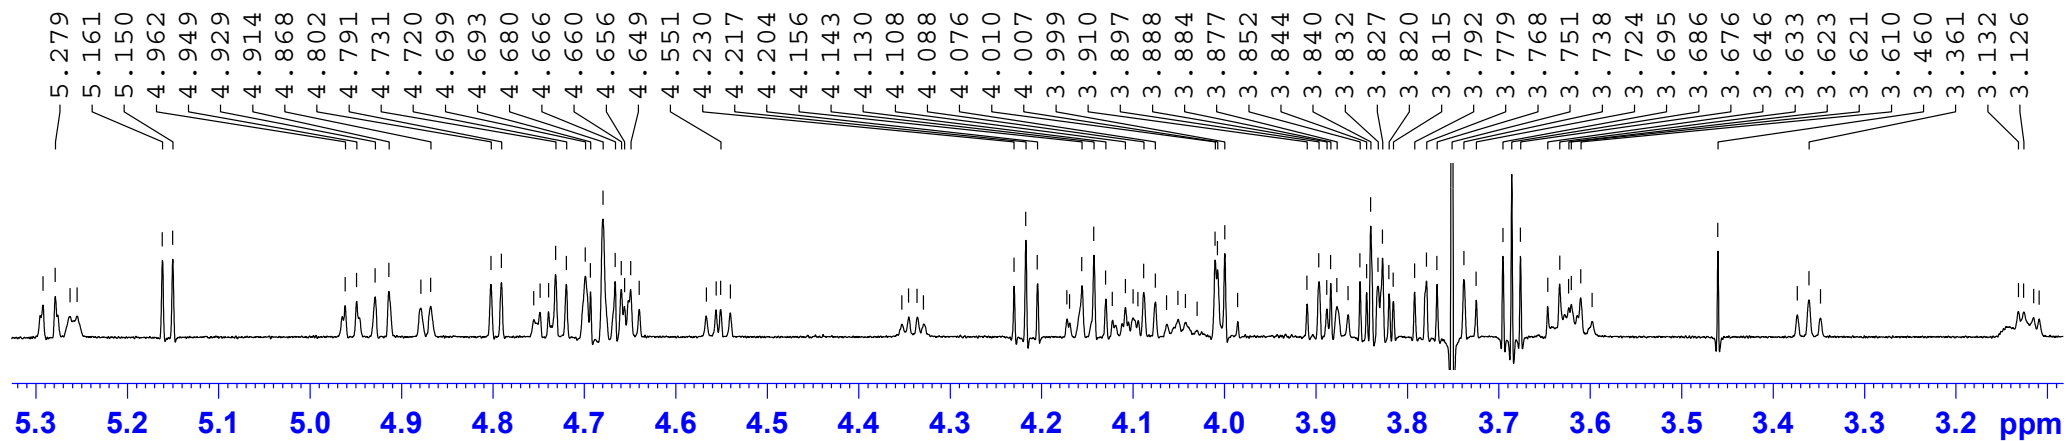

Figure 46. The  $^1\text{H}$  NMR (700.13 MHz) spectrum of the carbohydrate moiety of **9** in  $\text{C}_5\text{D}_5\text{N}/\text{D}_2\text{O}$  (4/1).

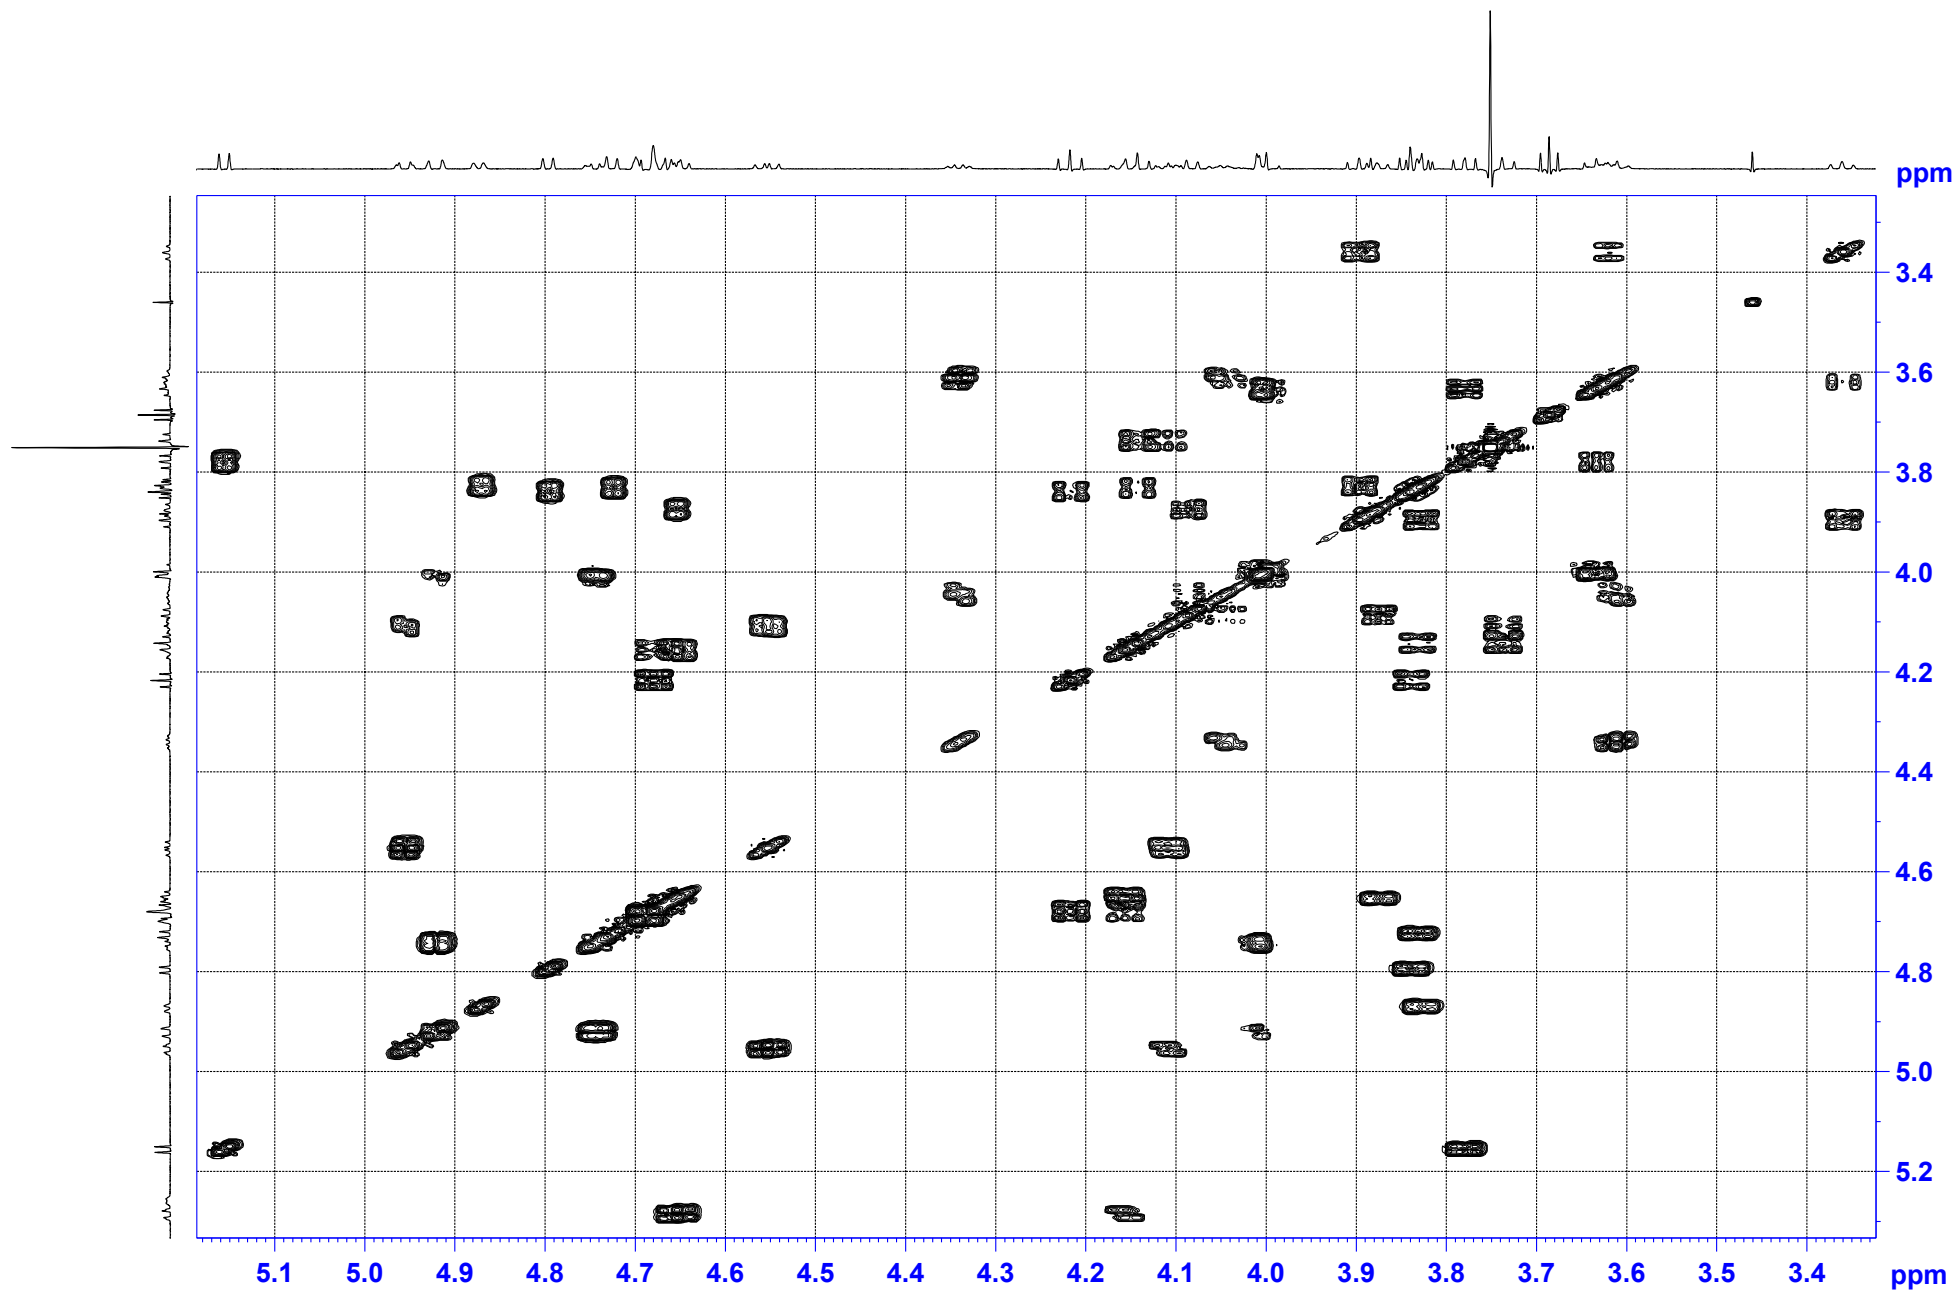

Figure 47. The COSY (700.13 MHz) spectrum of the carbohydrate moiety of 9 in C<sub>5</sub>D<sub>5</sub>N/D<sub>2</sub>O (4/1).

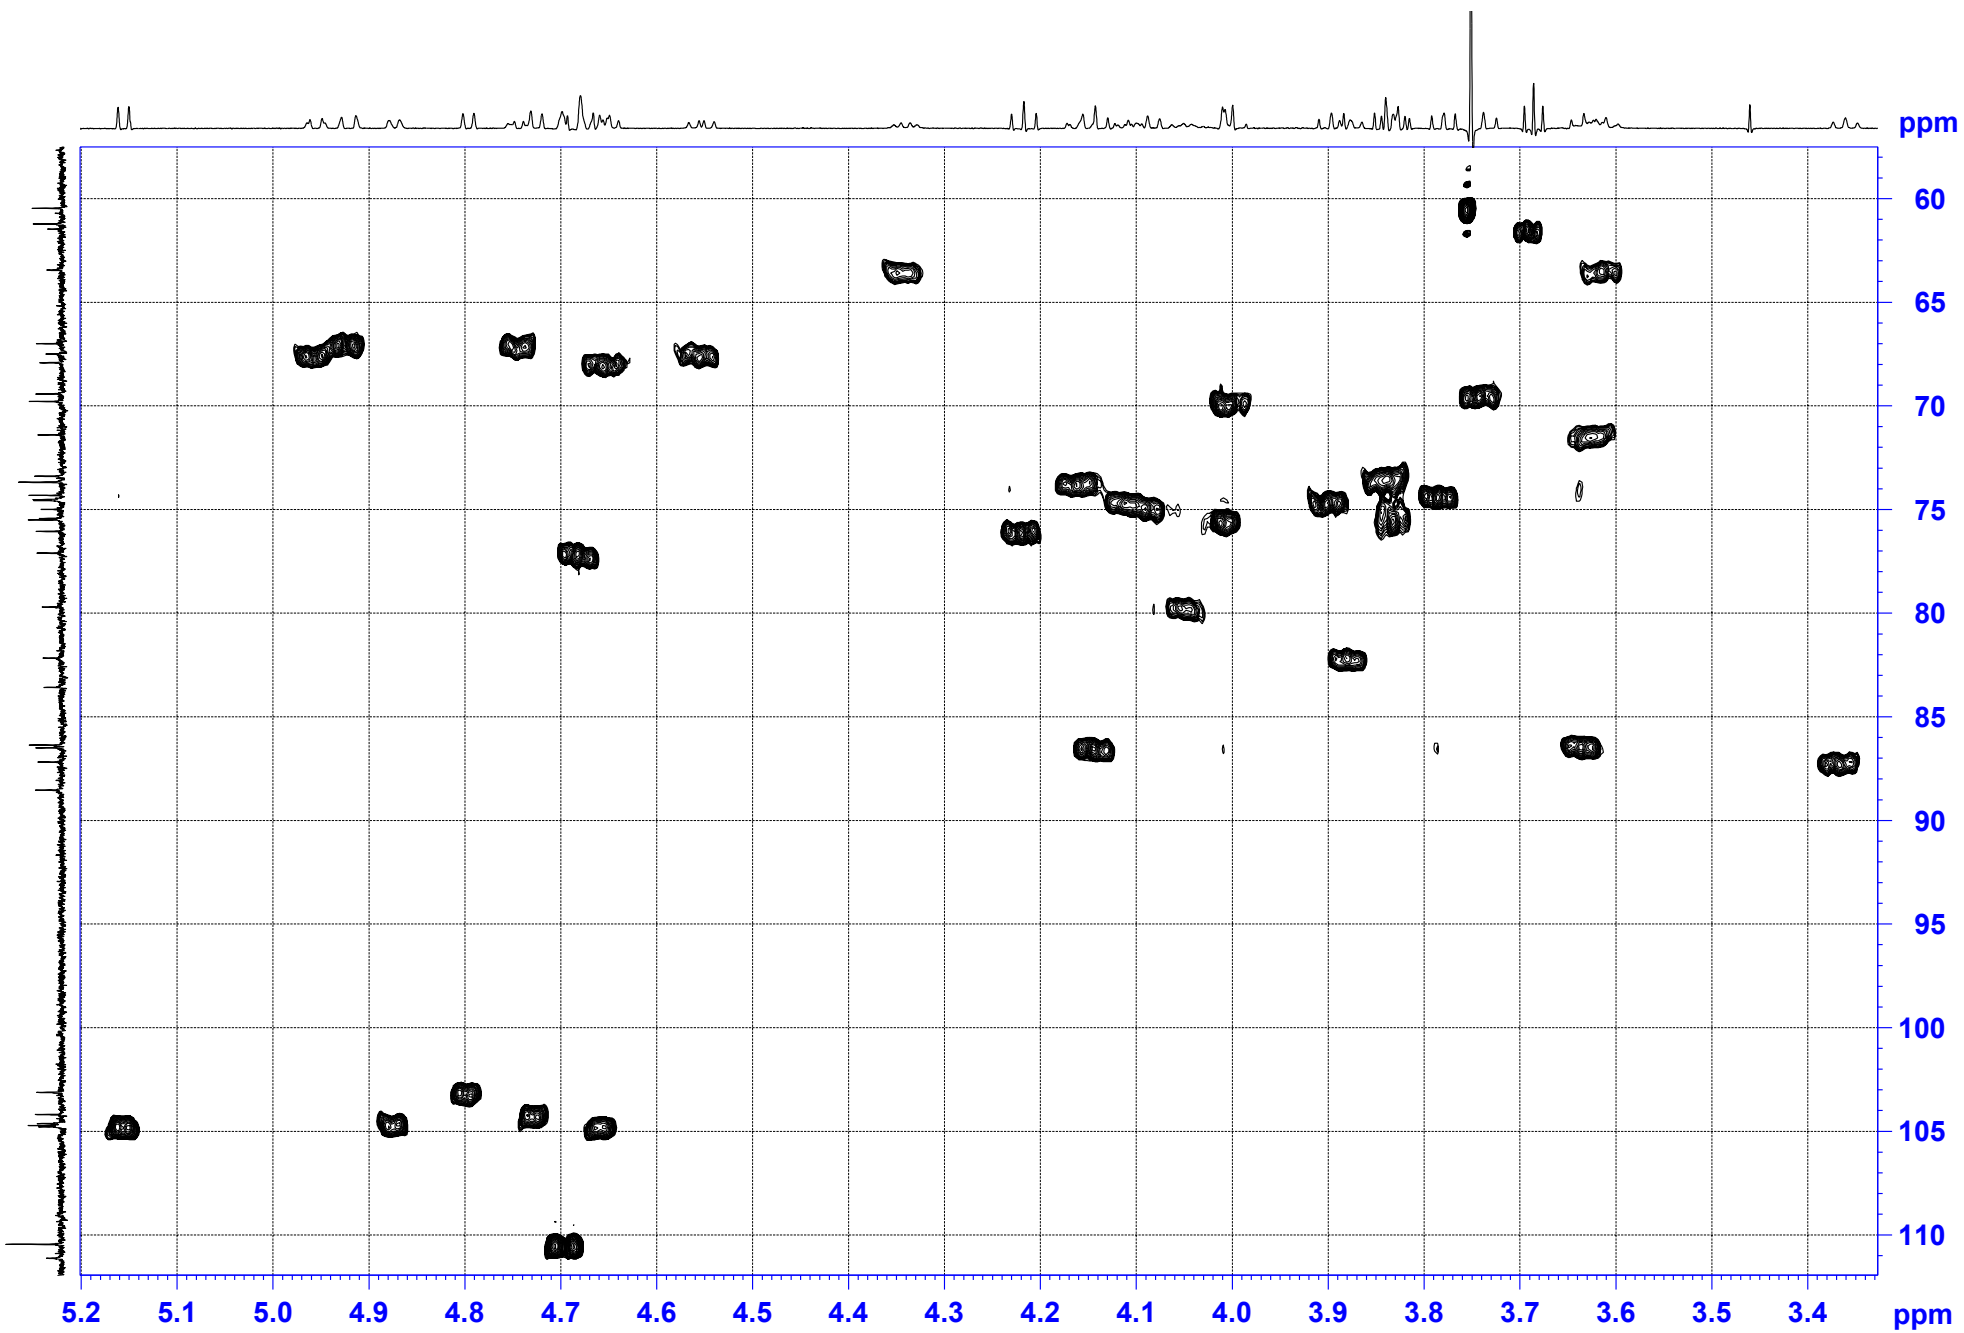

Figure 48. The HSQC (700.13 MHz) spectrum of the carbohydrate moiety of **9** in  $\text{C}_5\text{D}_5\text{N}/\text{D}_2\text{O}$  (4/1).

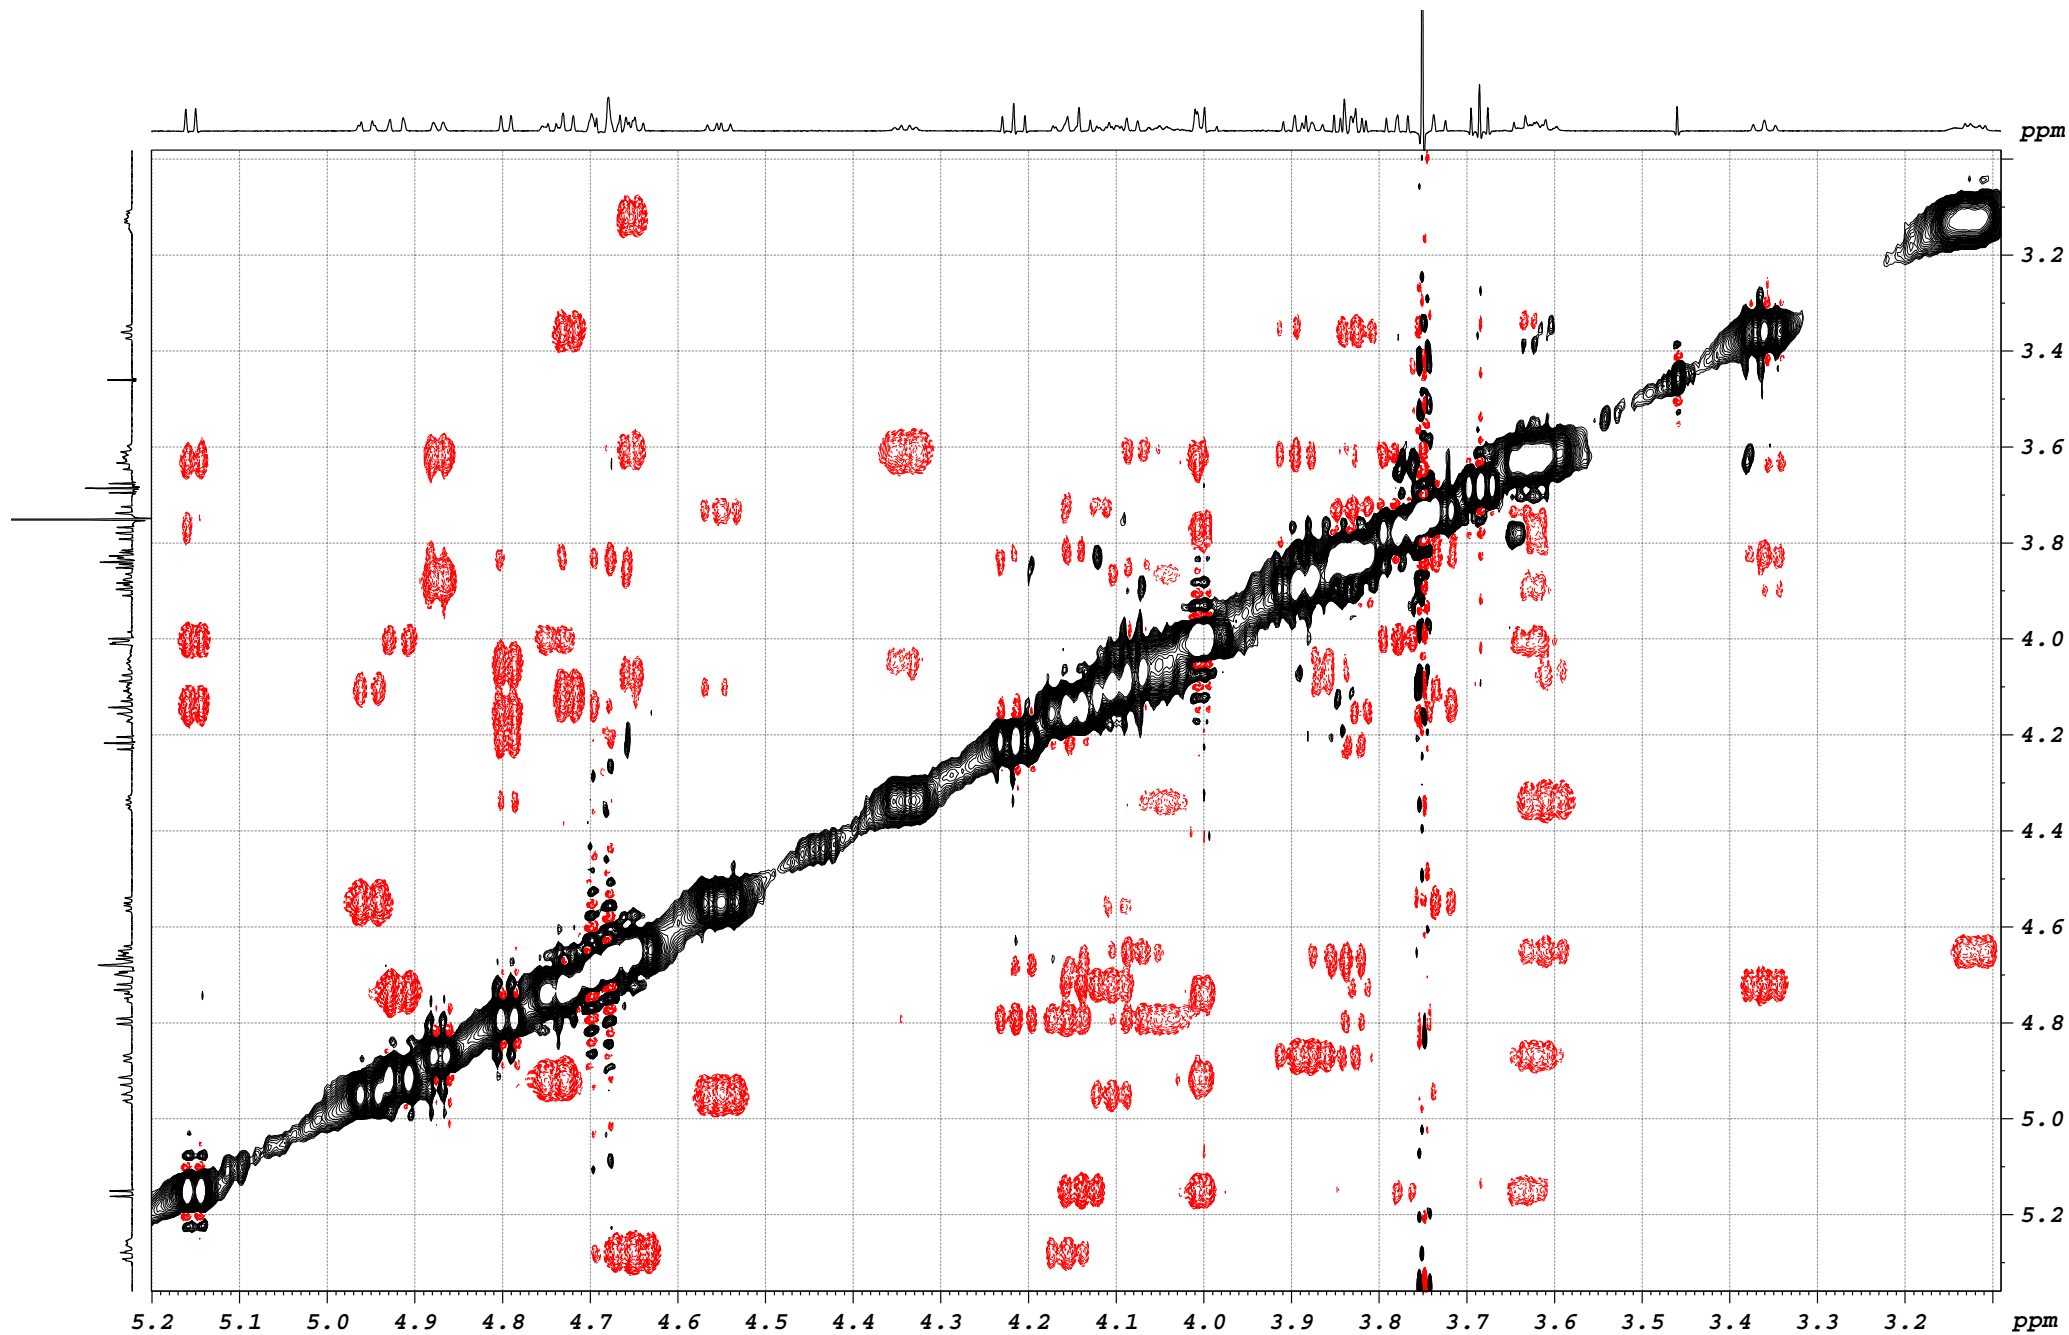

Figure 49. The ROESY (500.13 MHz) spectrum of the carbohydrate moiety of **9** in C<sub>5</sub>D<sub>5</sub>N/D<sub>2</sub>O (4/1).

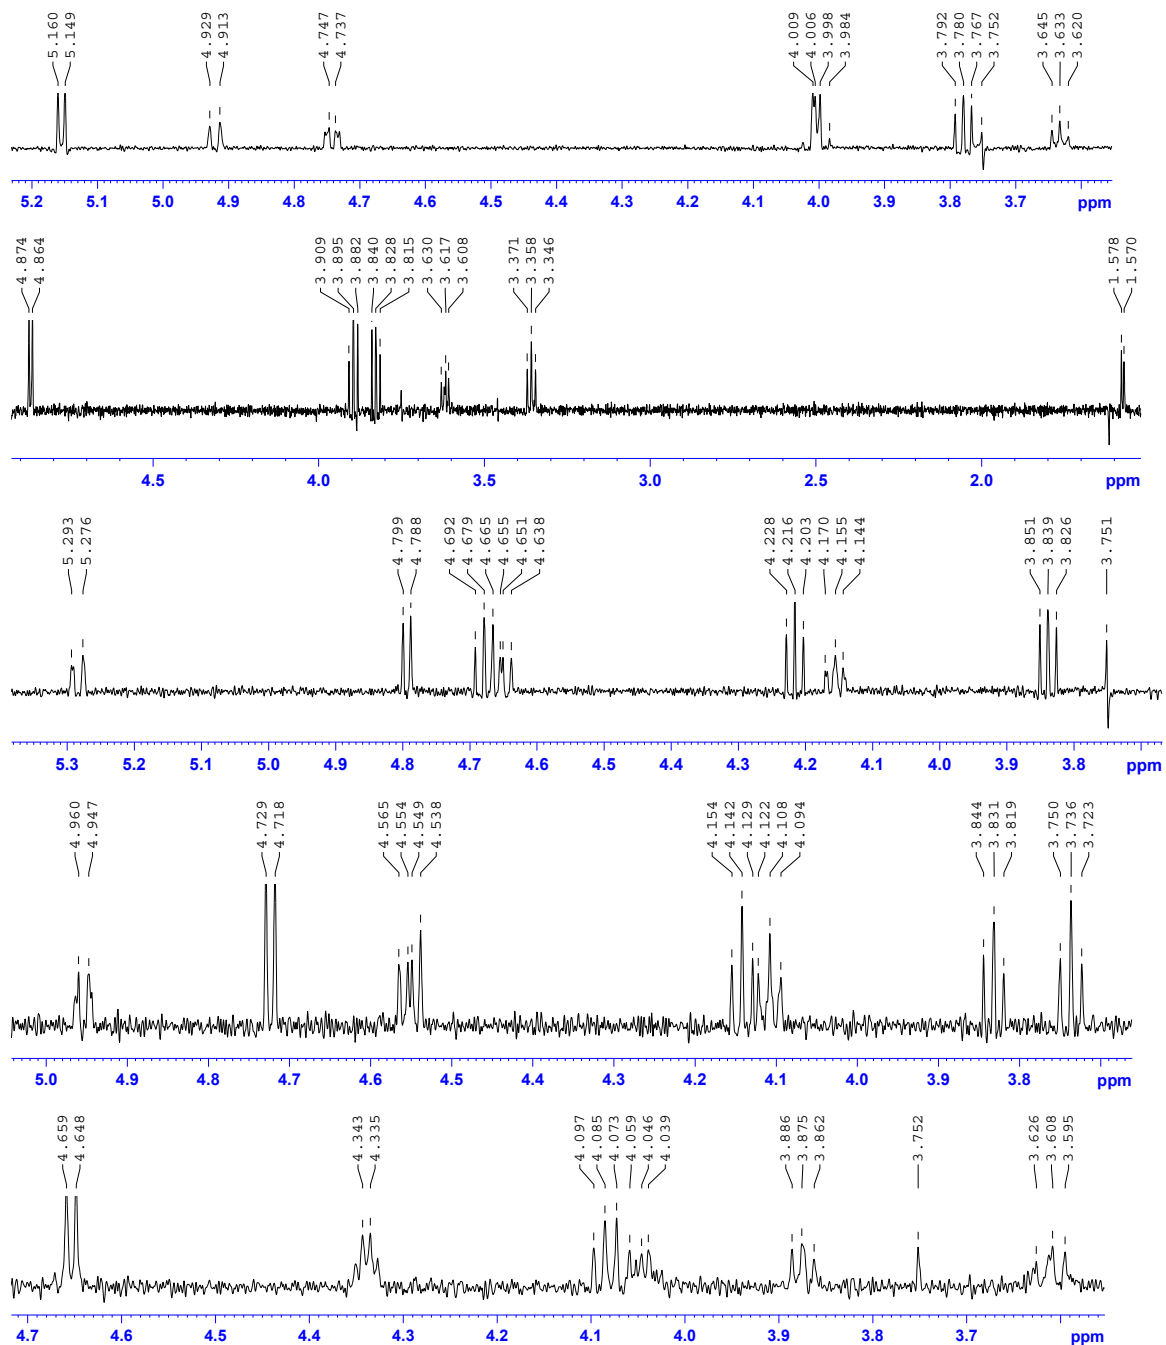

**Figure 50.** 1D TOCSY (700.13 MHz) spectra of the monosaccharide residues in **9** in  $C_5D_5N/D_2O$  (4/1).

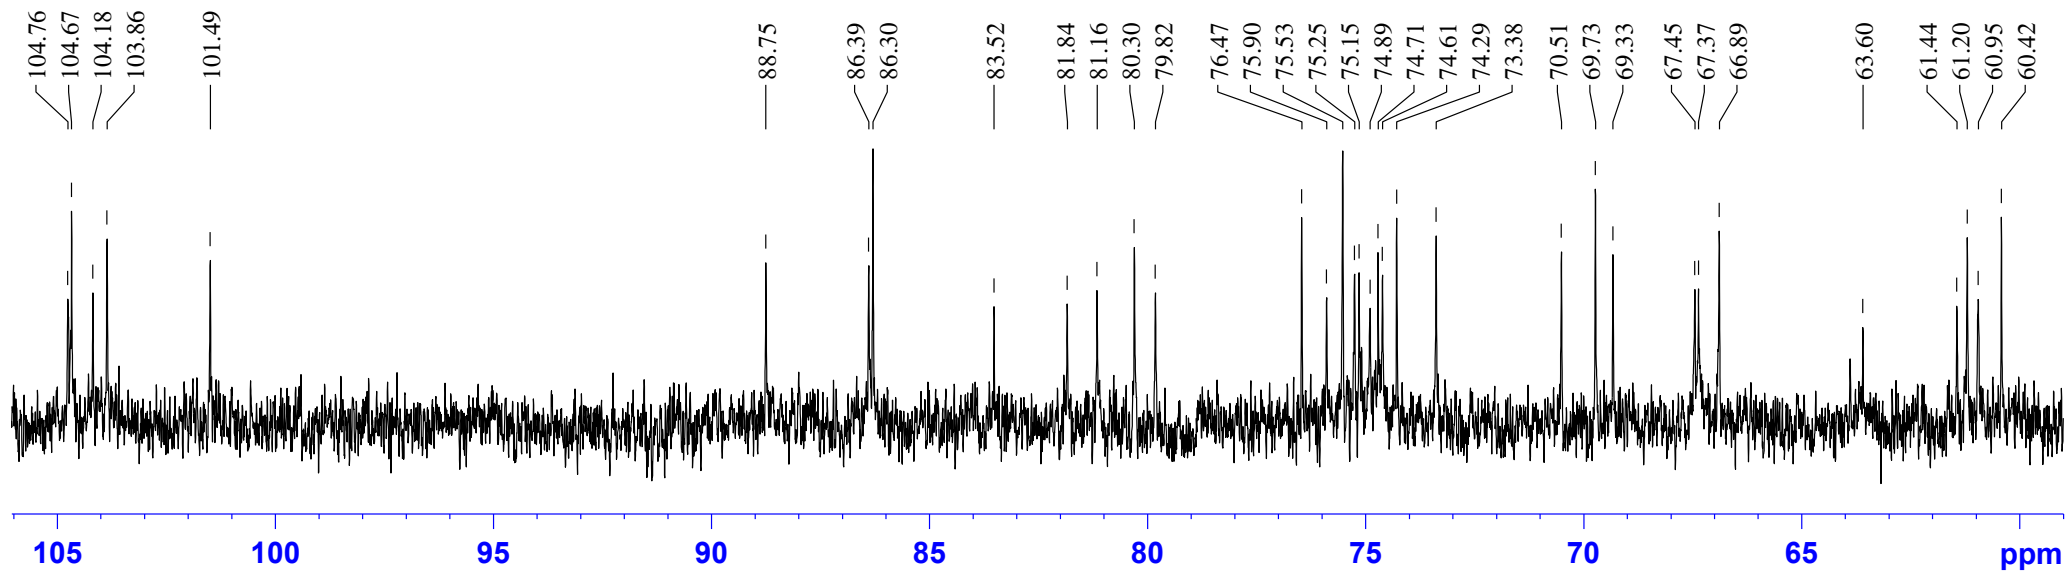

Figure 51. The  $^{13}\text{C}$  NMR (176.04 MHz) spectrum of the carbohydrate moiety of **10** in  $\text{C}_5\text{D}_5\text{N}/\text{D}_2\text{O}$  (4/1).

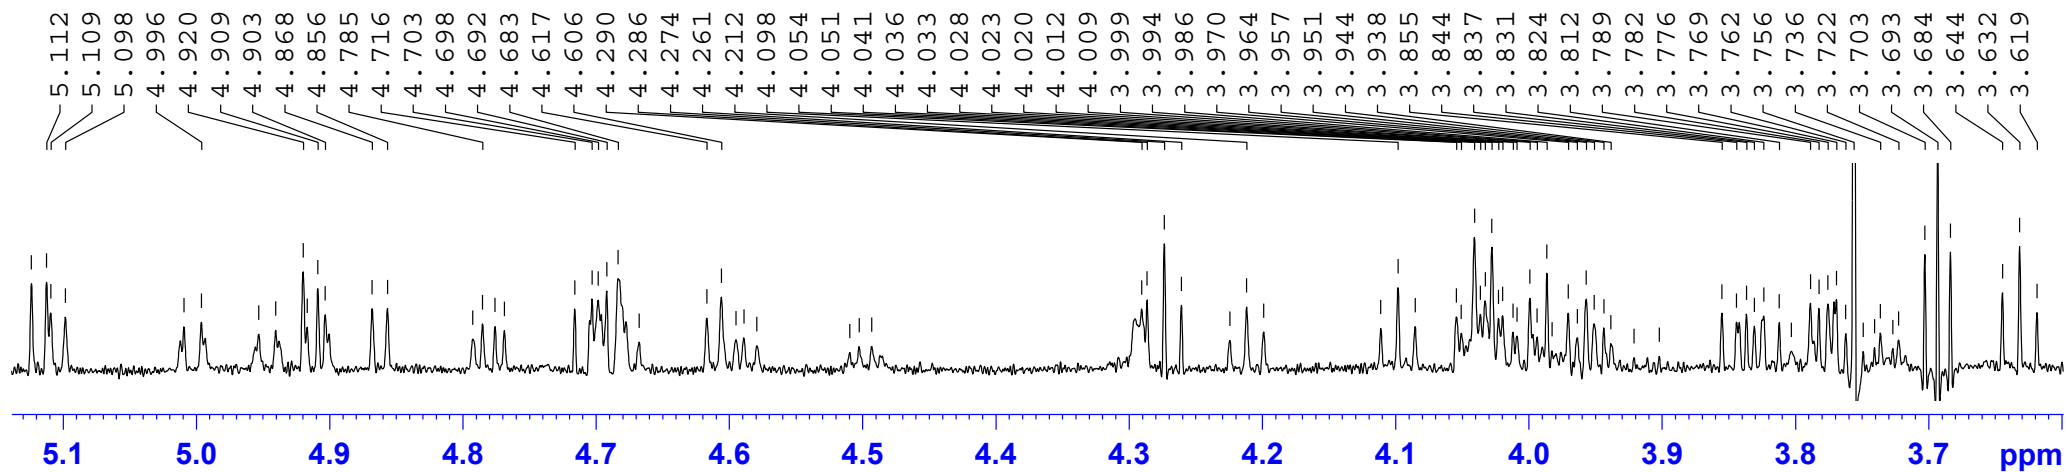

Figure 52. The  $^1\text{H}$  NMR (700.13 MHz) spectrum of the carbohydrate moiety of **10** in  $\text{C}_5\text{D}_5\text{N}/\text{D}_2\text{O}$  (4/1).



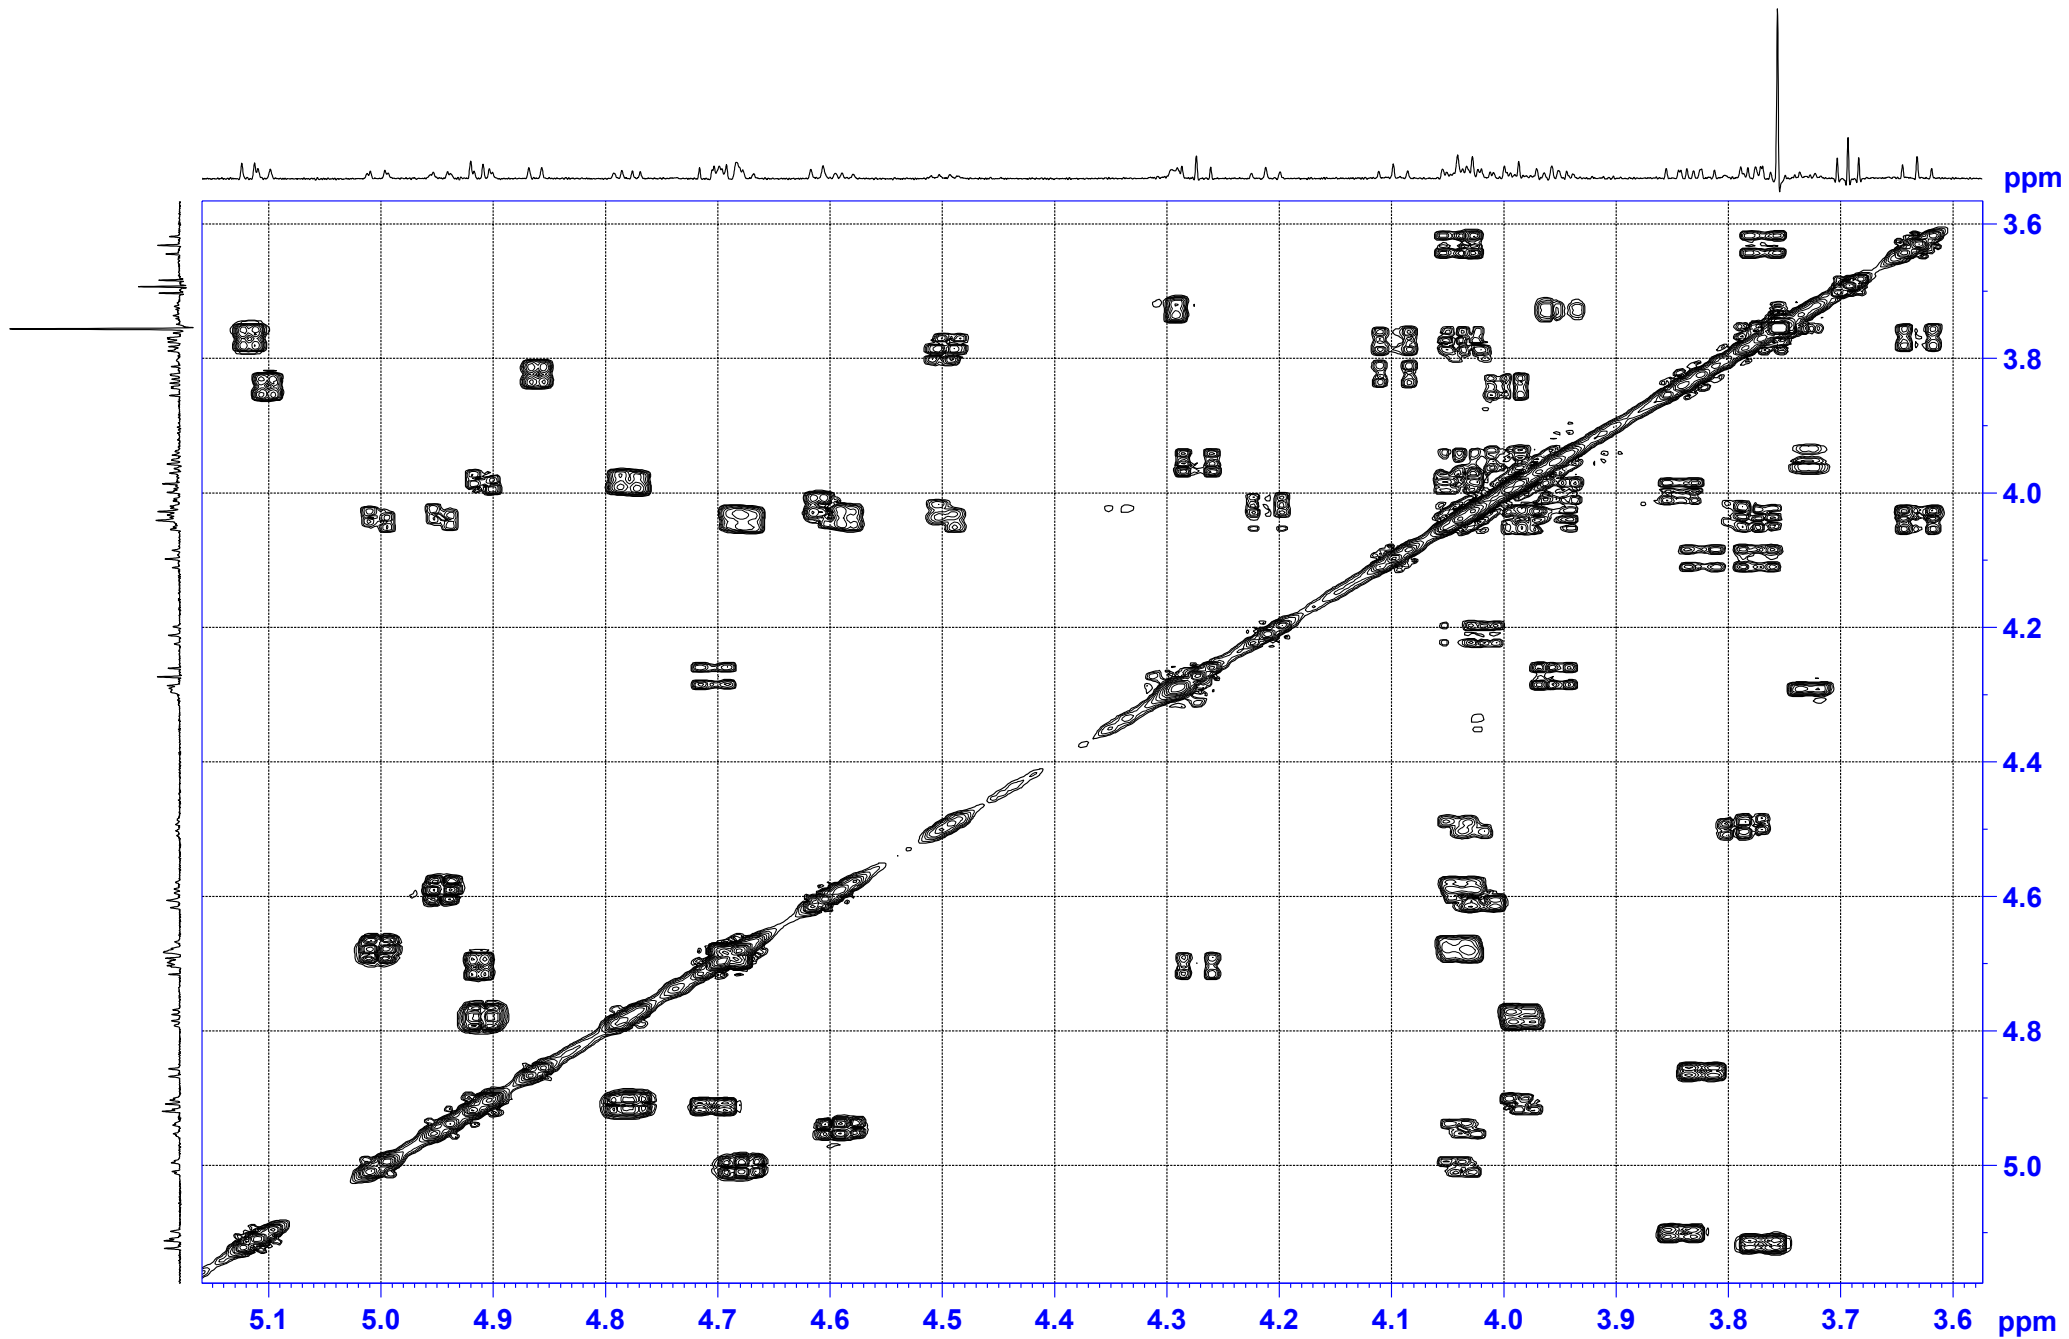

Figure 53. The COSY (700.13 MHz) spectrum of the carbohydrate moiety of 10 in C<sub>5</sub>D<sub>5</sub>N/D<sub>2</sub>O (4/1).

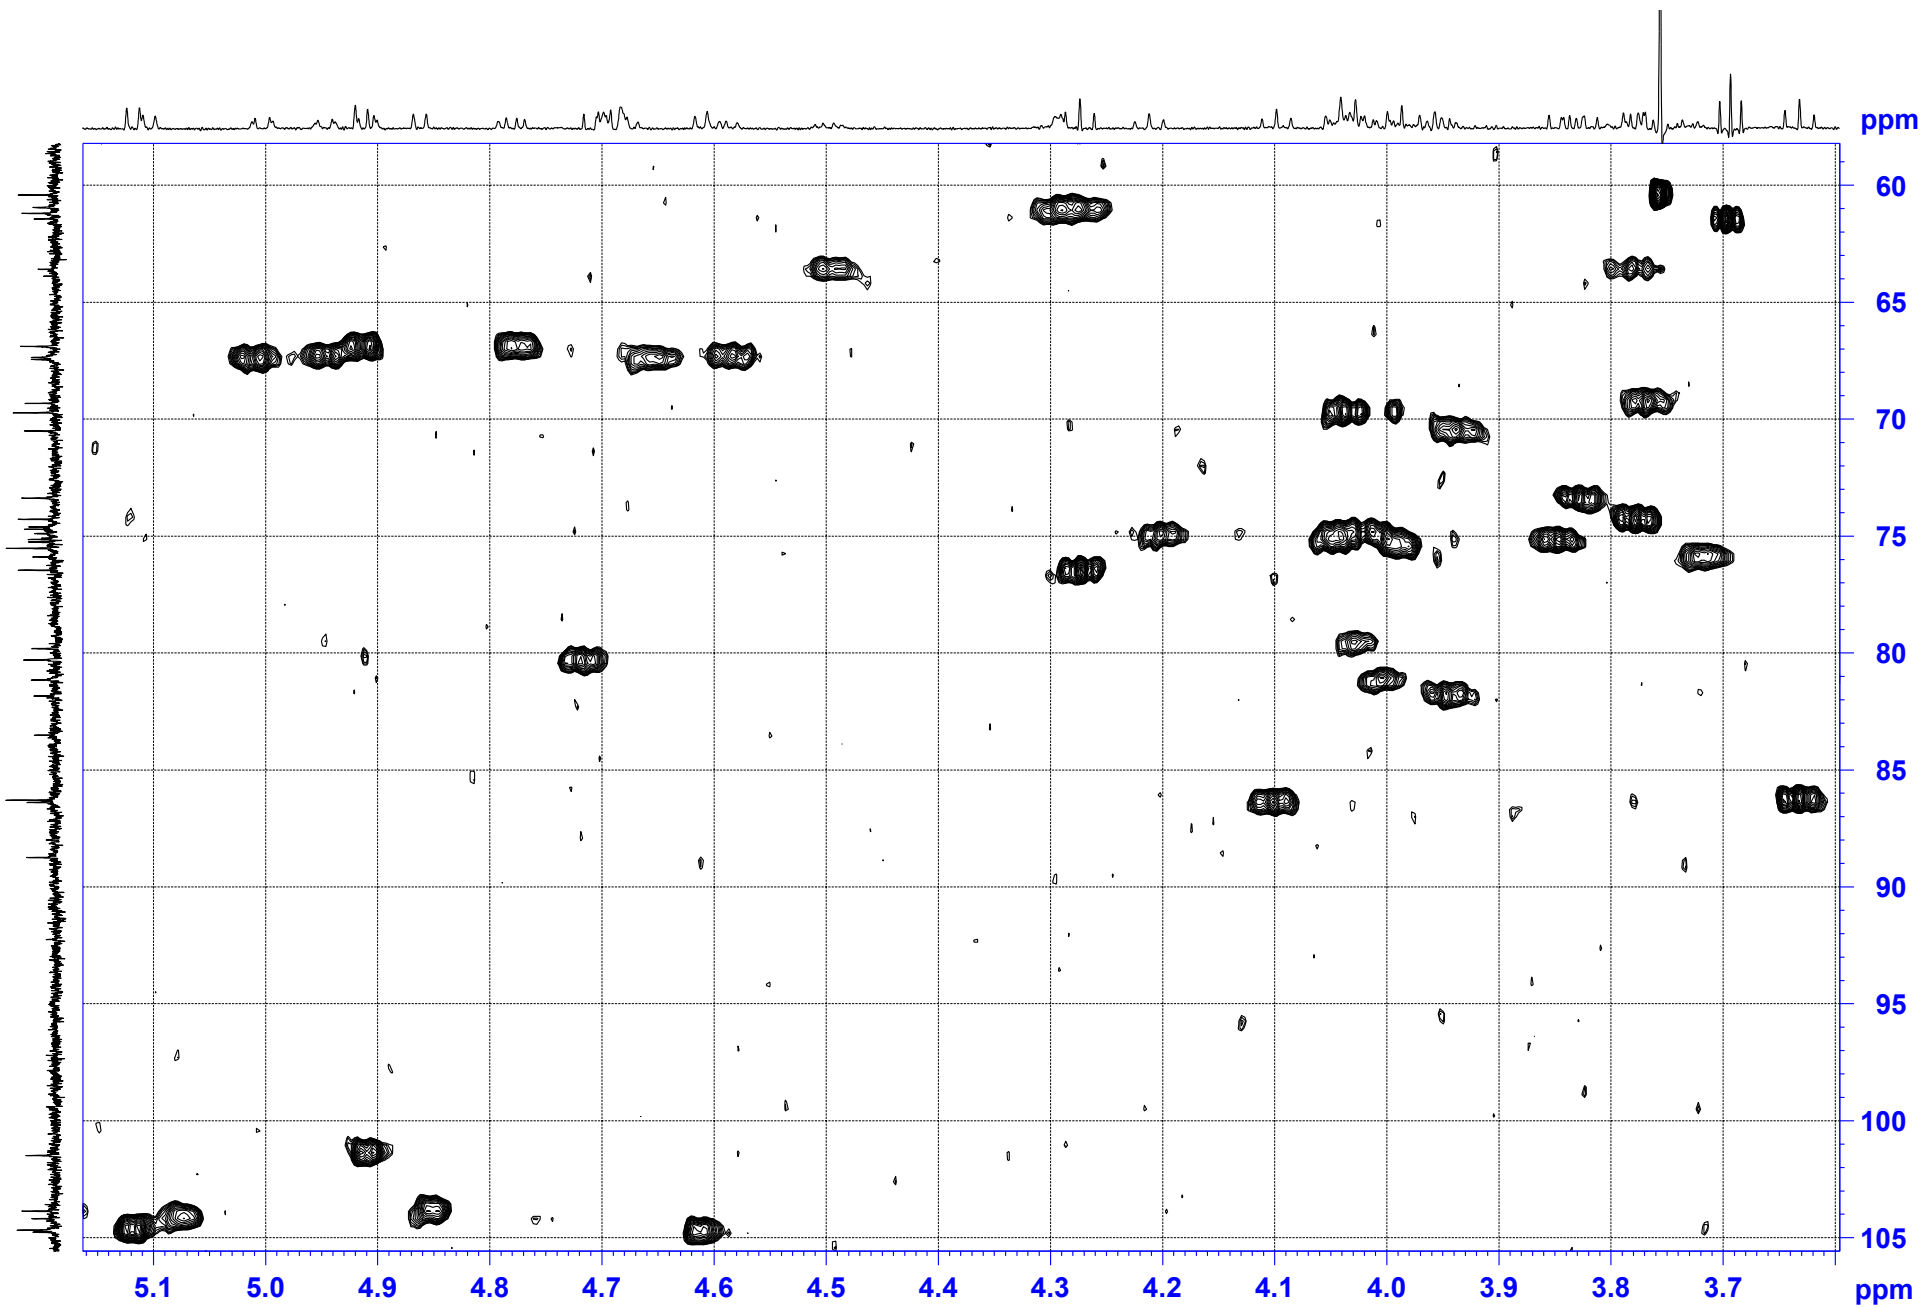

Figure 54. The HSQC (700.13 MHz) spectrum of the carbohydrate moiety of **10** in  $\text{C}_5\text{D}_5\text{N}/\text{D}_2\text{O}$  (4/1).

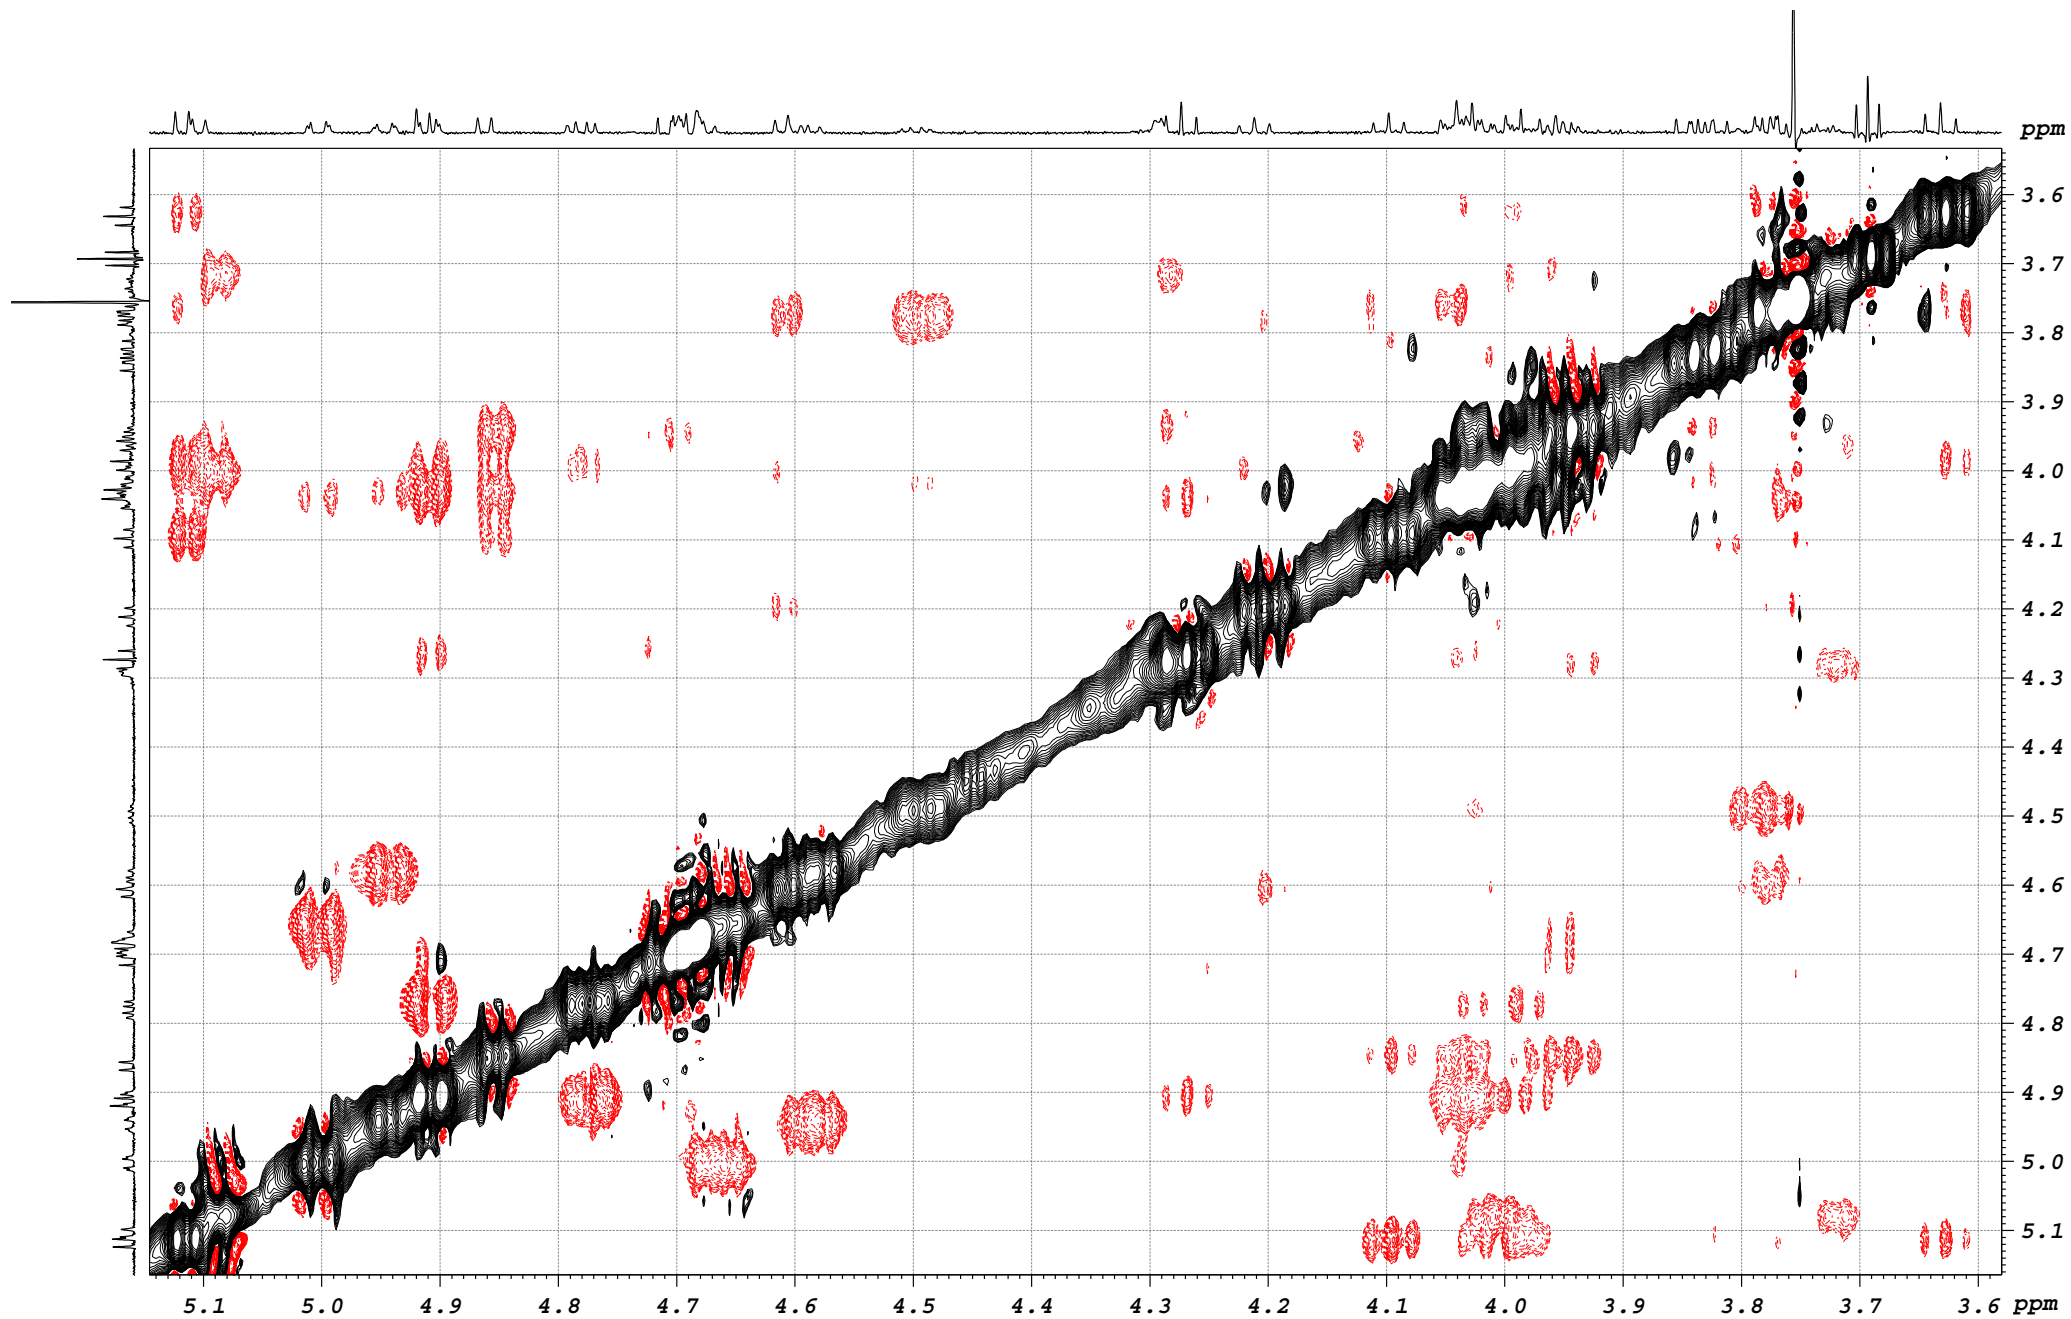

Figure 55. The ROESY (500.13 MHz) spectrum of the carbohydrate moiety of **10** in C<sub>5</sub>D<sub>5</sub>N/D<sub>2</sub>O (4/1).

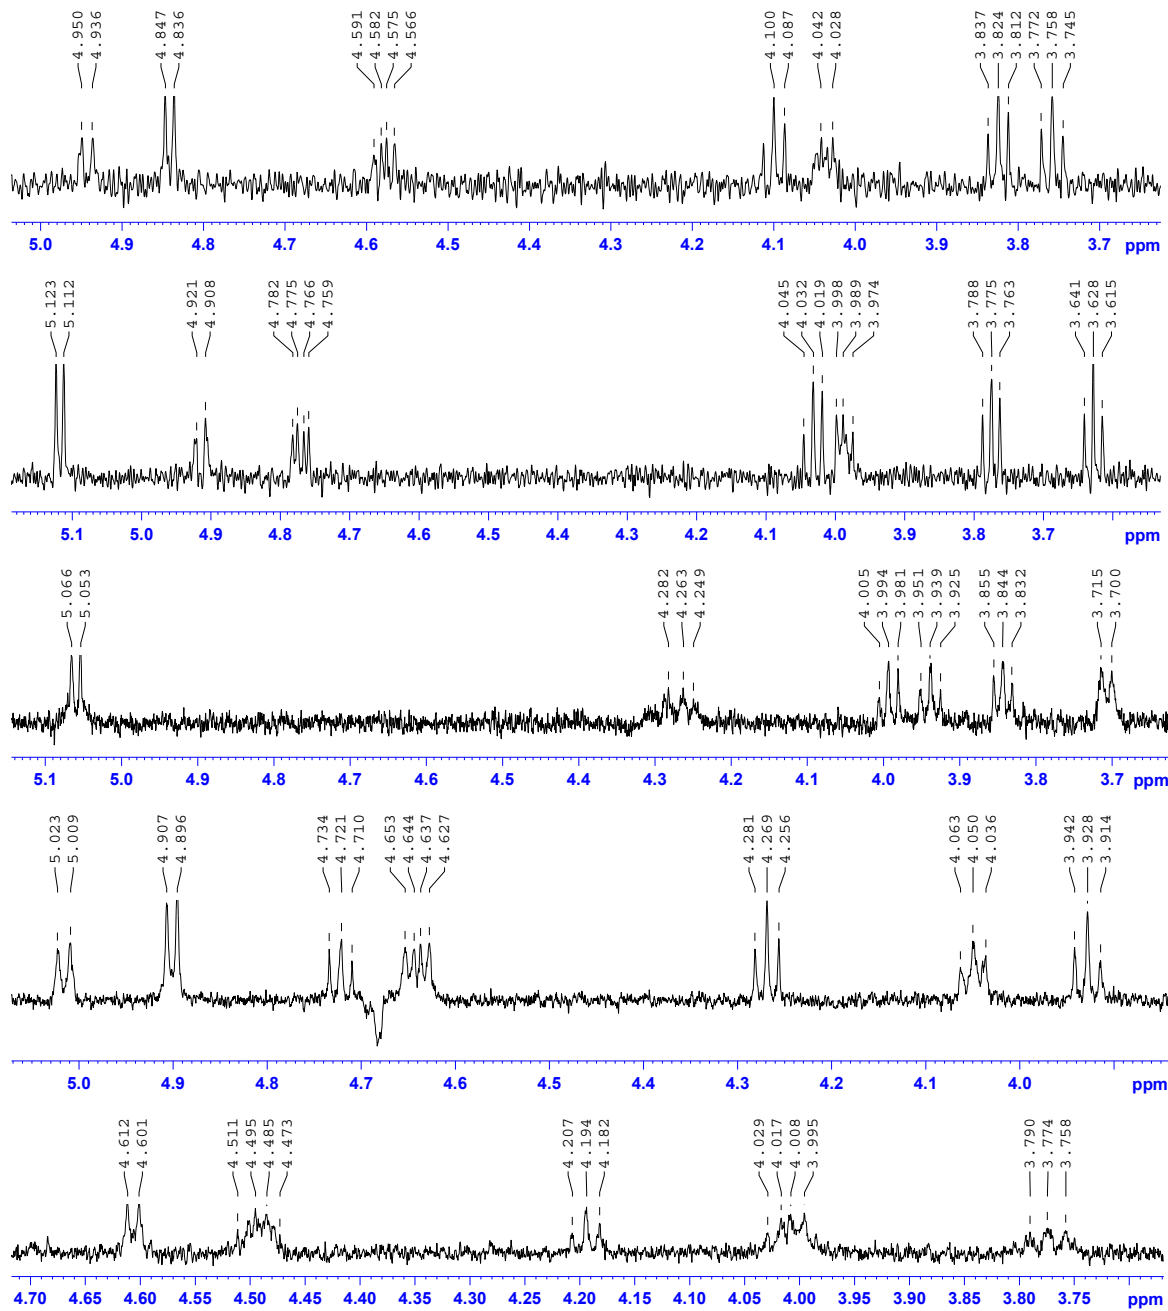

Figure 56. 1D TOCSY (700.13 MHz) spectra of the monosaccharide residues in **10** in  $C_5D_5N/D_2O$  (4/1).

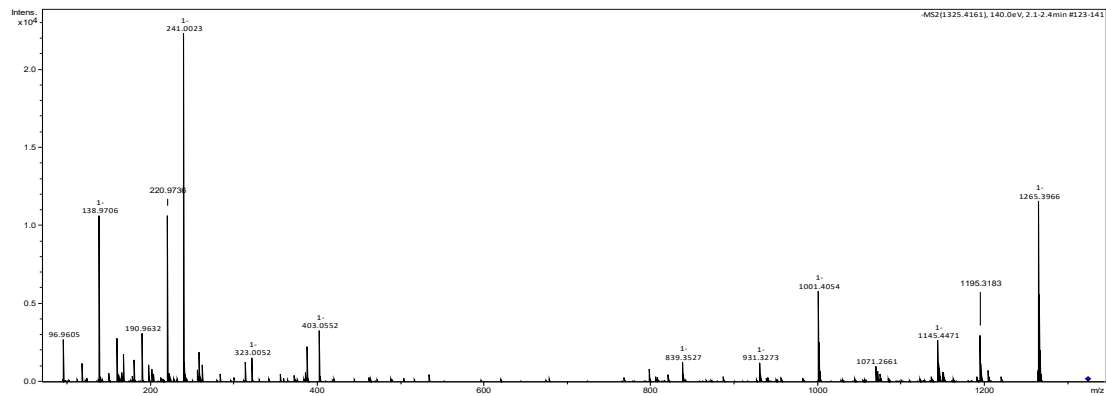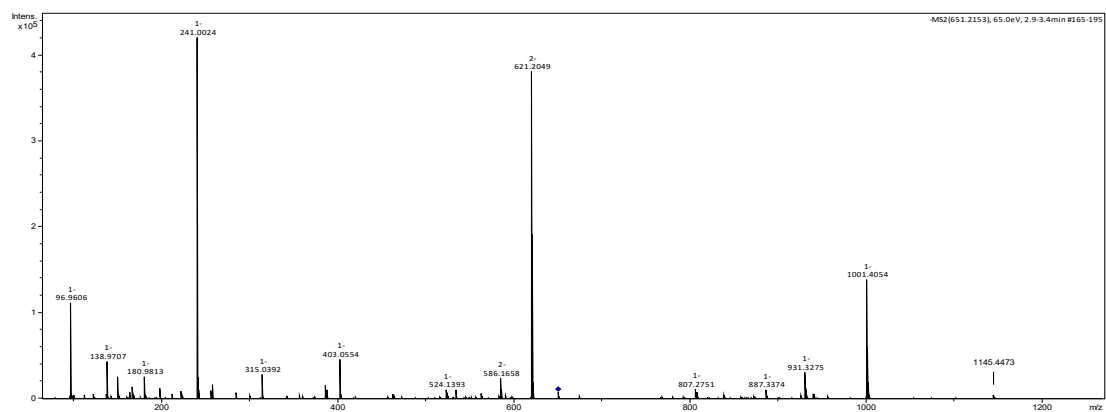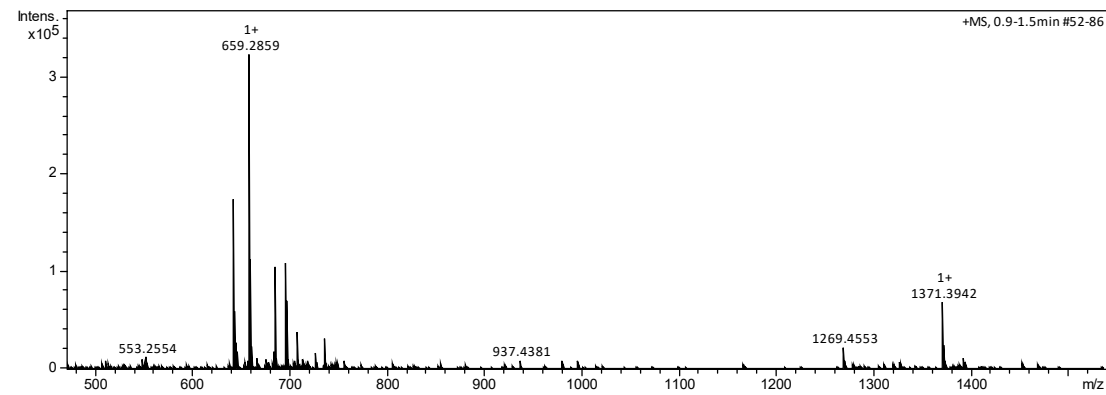

Figure 57. ESI-MS (-) spectra of psuloside B<sub>1</sub> (1).

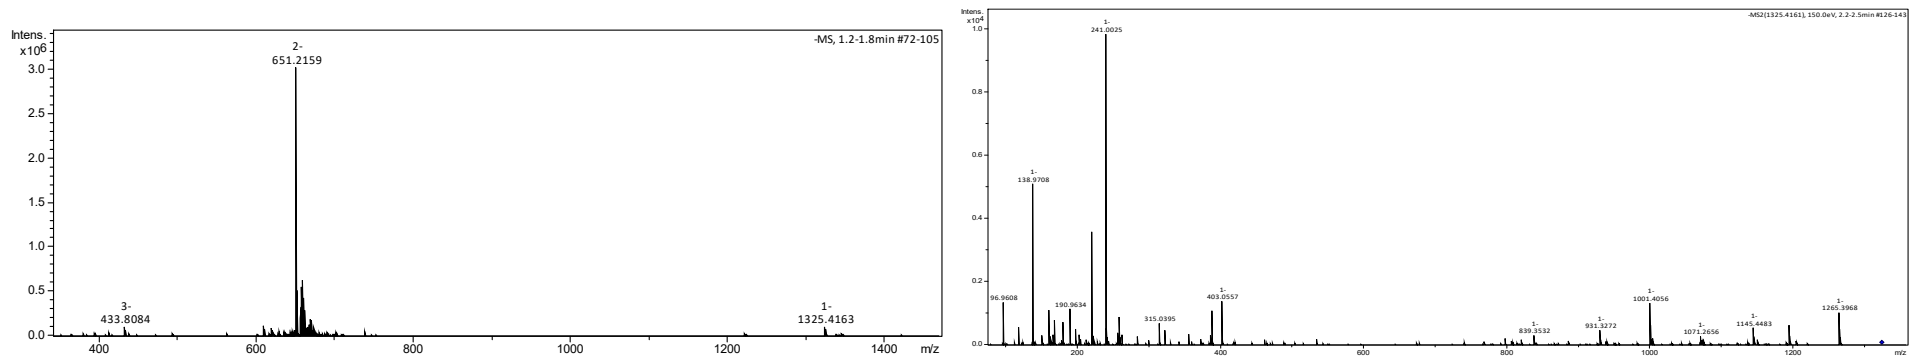

Figure 58. ESI-MS (-) spectra of psuloside B2 (2).

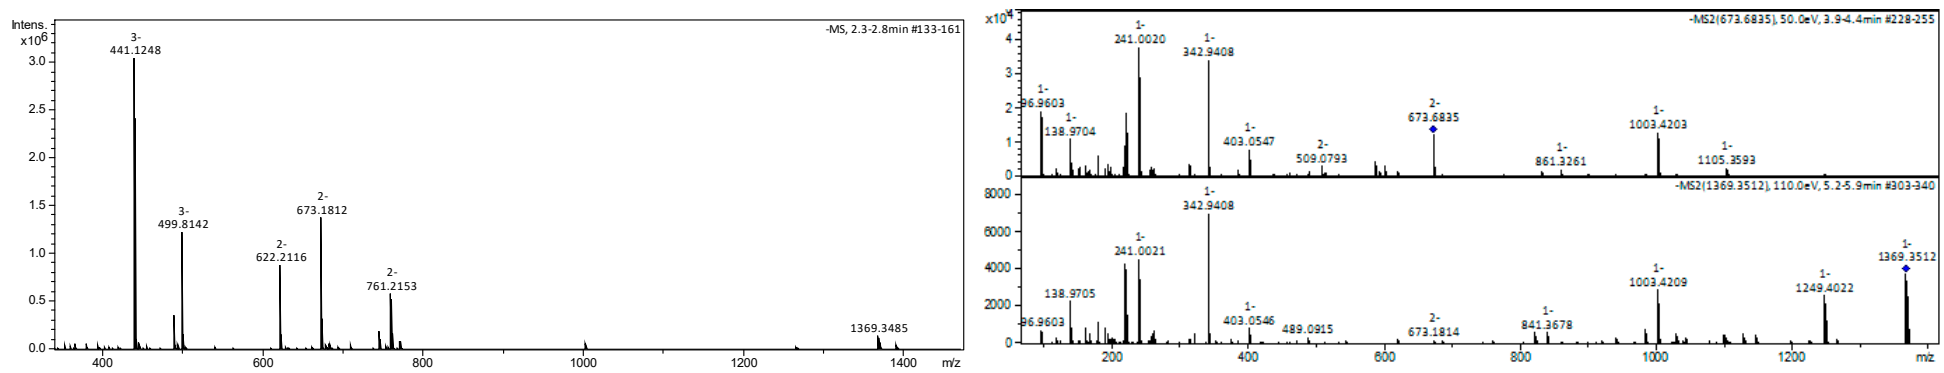

Figure 59. ESI-MS (-) spectra of psuloside J (3).

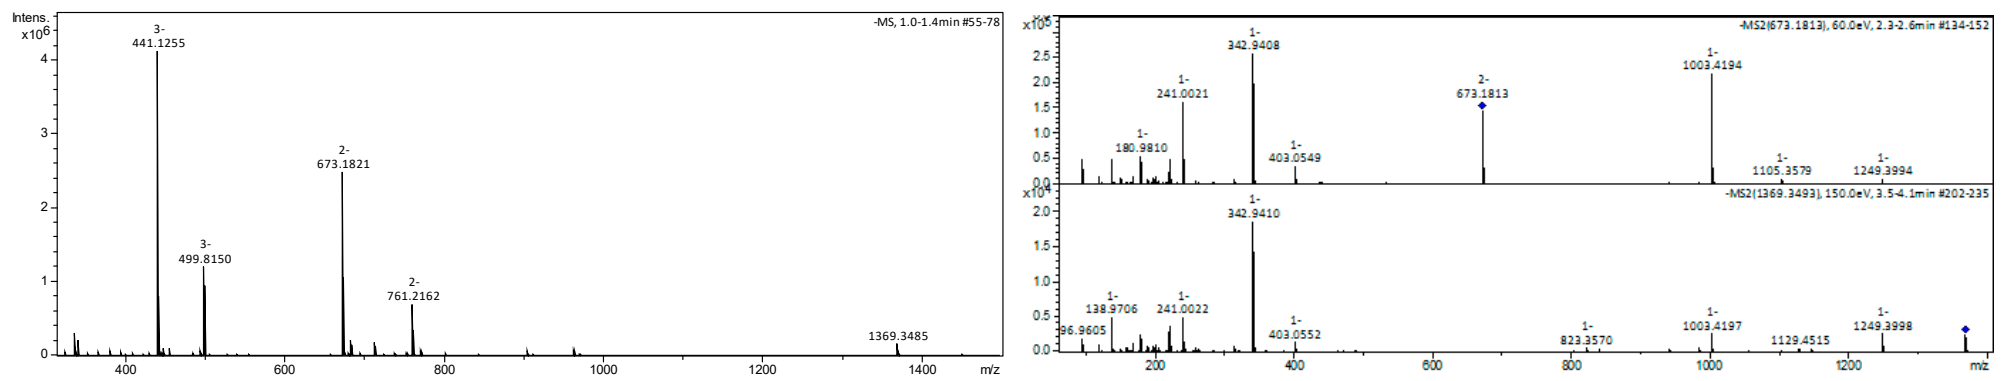

Figure 60. ESI-MS (-) spectra of psuloside K (4).

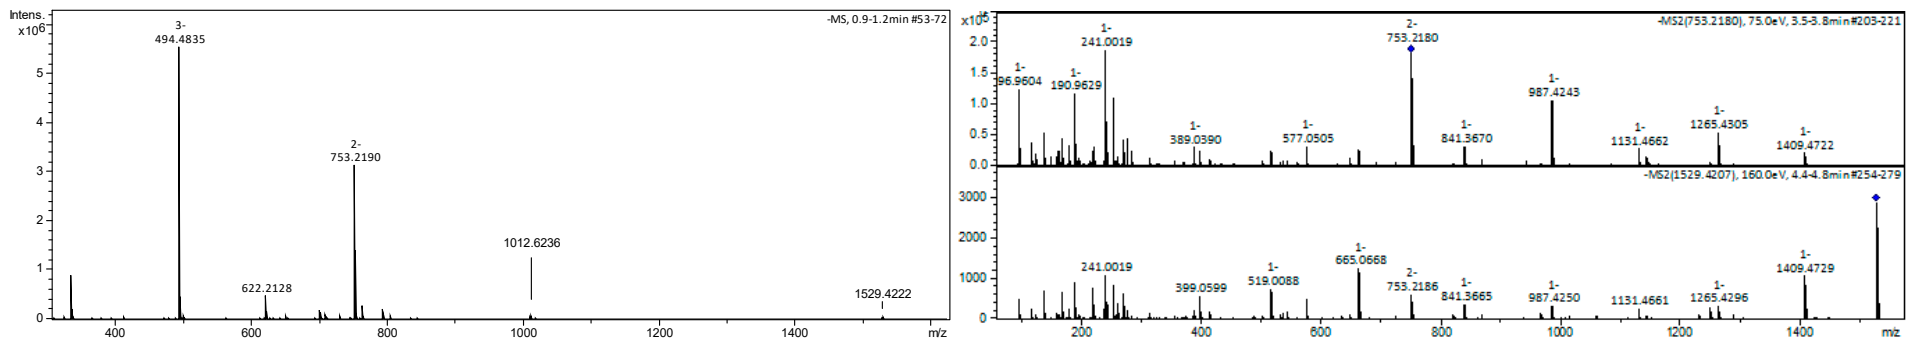

Figure 61. ESI-MS (-) spectra of psulososide L (5).

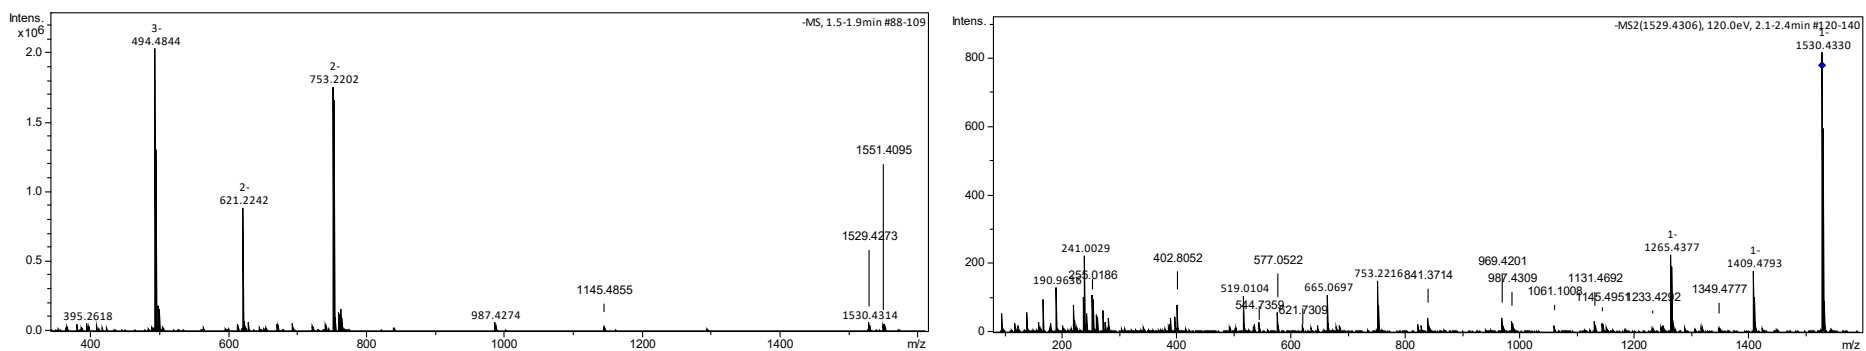

Figure 62. ESI-MS (-) spectra of psulososide M (6).

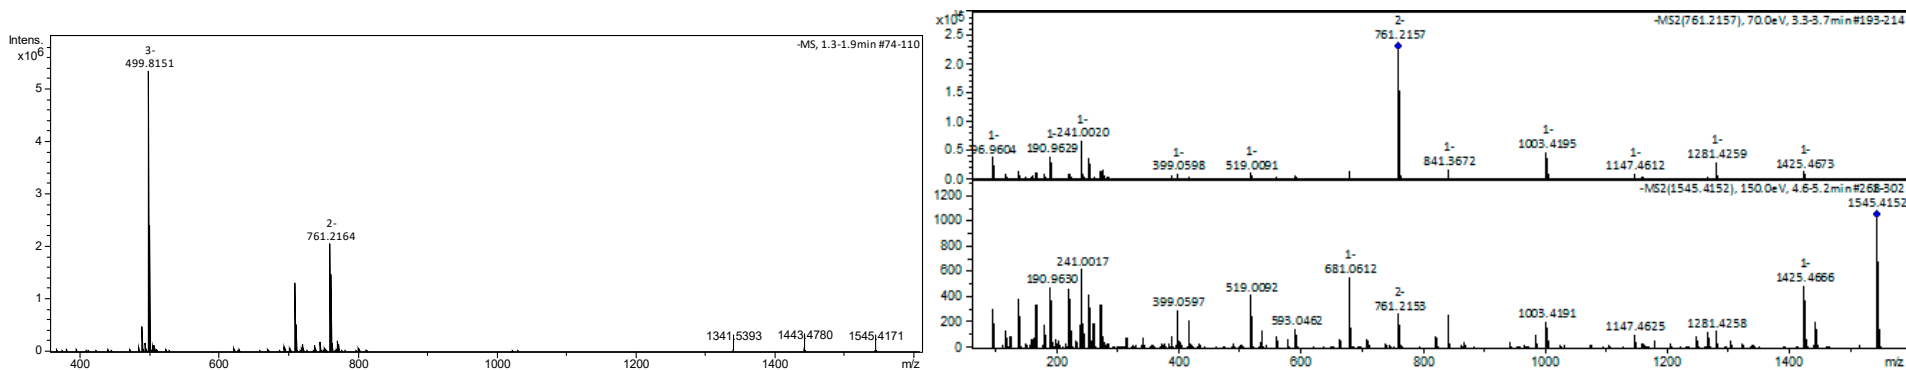

Figure 63. ESI-MS (-) spectra of psulososide N (7).

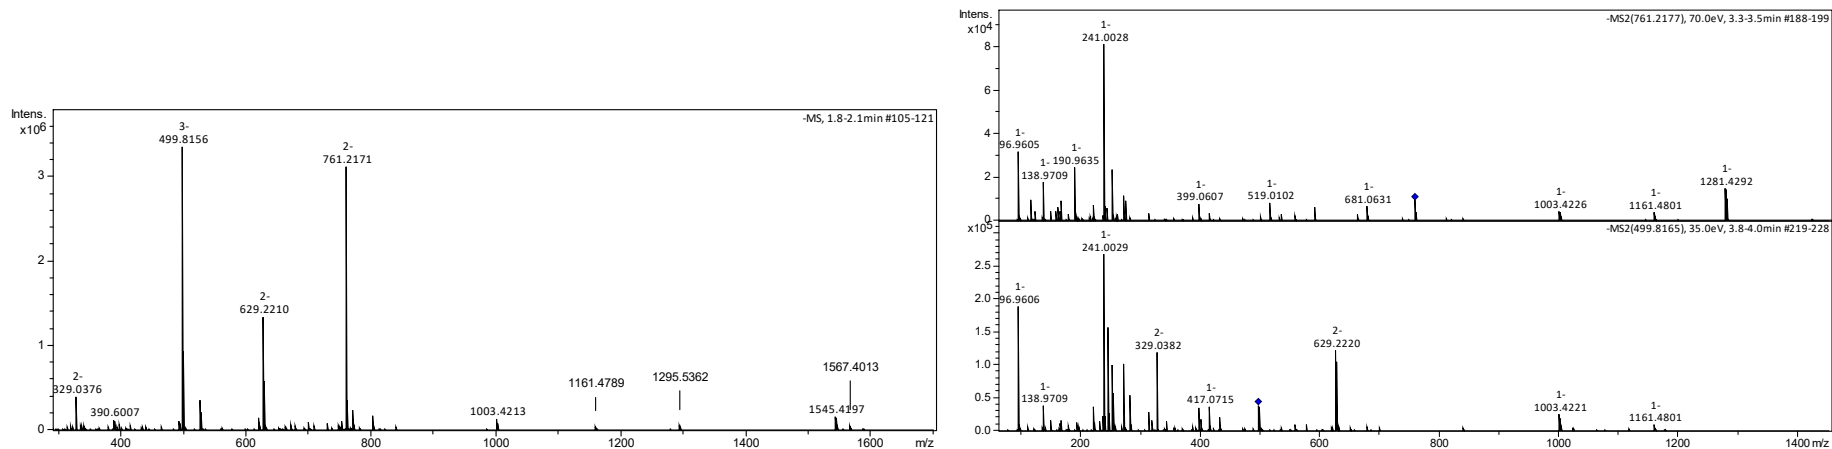

Figure 64. ESI-MS (-) spectra of psuloside O (8).

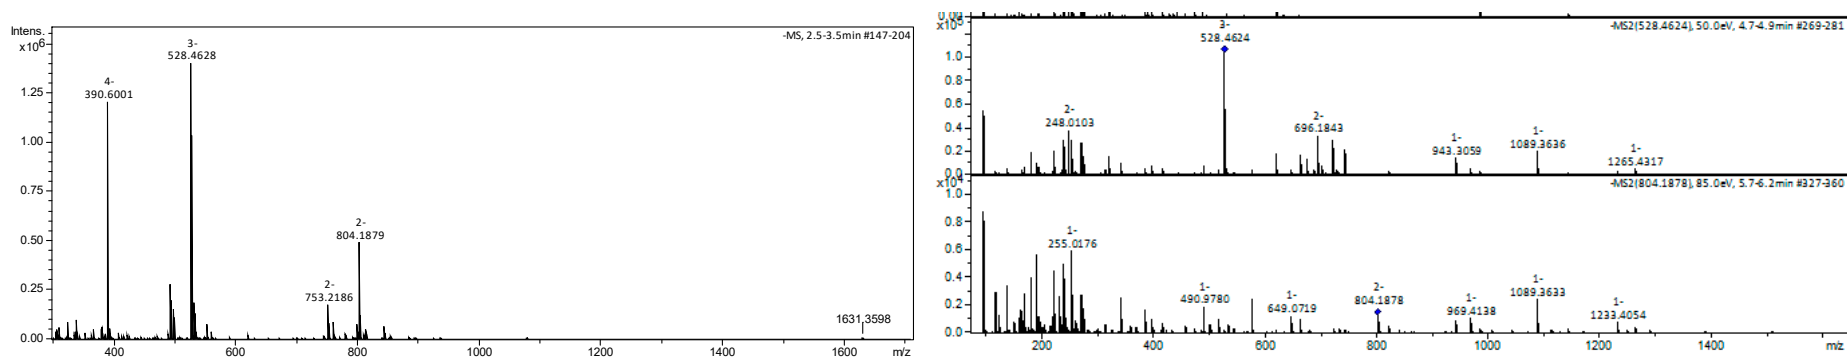

Figure 65. ESI-MS (-) spectra of psuloside P (9).

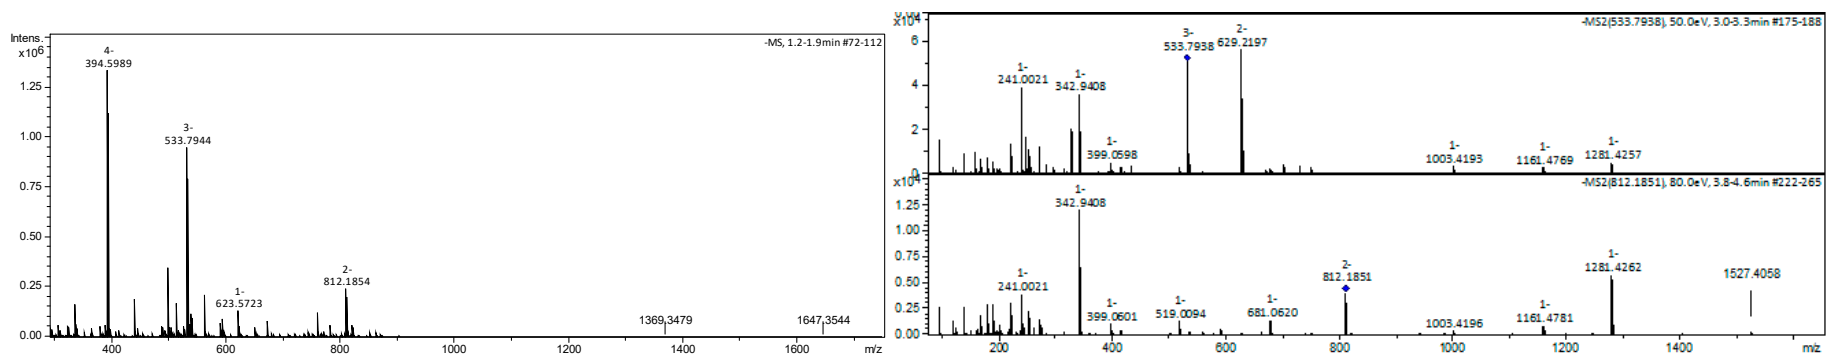

Figure 66. ESI-MS (-) spectra of psuloside Q (10).
